# Supplementary material for: Sex differences and sex bias in human circadian and sleep physiology research
Source: eLife. 2022 Feb 18;11:e65419. doi: 10.7554/eLife.65419 (PMC8963875; doi:10.7554/eLife.65419)
Supplement: Figure 1—source data 1. [file elife-65419-fig1-data1.xlsx]

## Sheet: 20191022_SCOPUS_edited
Authors	Author(s) ID	Title	Year	Source title	Volume	Issue	Art. No.	Page start	Page end	Page count	Cited by	DOI	Link	Affiliations	Authors with affiliations	Abstract	Author Keywords	Index Keywords	Molecular Sequence Numbers	Chemicals/CAS	Tradenames	Manufacturers	Funding Details	Funding Text 1	Funding Text 2	Funding Text 3	Correspondence Address	Editors	Sponsors	Publisher	Conference name	Conference date	Conference location	Conference code	ISSN	ISBN	CODEN	PubMed ID	Language of Original Document	Abbreviated Source Title	Document Type	Publication Stage	Access Type	Source	EID	ID	Filename	Sci-Hub Link	Downloaded?
Lewy A.J., Wehr T.A., Goodwin F.K., Newsome D.A., Markey S.P.	7004848014;7004768783;16197069900;57200926644;57206931094;	Light suppresses melatonin secretion in humans	1980	Science	210	4475		1267	1269		1279	10.1126/science.7434030	https://www.scopus.com/inward/record.uri?eid=2-s2.0-0019202320&doi=10.1126%2fscience.7434030&partnerID=40&md5=8a9e7498f9e78ad5d10784ab009f465f	Clinical Psychobiology Branch, National Institute of Mental Health, Bethesda, MD 20205, United States; Clinical Branch, National Eye Institute, National Institutes of Health, Bethesda, MD 20205, United States; Laboratory of Clinical Science, National Institute of Mental Health	Lewy, A.J., Clinical Psychobiology Branch, National Institute of Mental Health, Bethesda, MD 20205, United States; Wehr, T.A., Clinical Psychobiology Branch, National Institute of Mental Health, Bethesda, MD 20205, United States; Goodwin, F.K., Clinical Psychobiology Branch, National Institute of Mental Health, Bethesda, MD 20205, United States; Newsome, D.A., Clinical Branch, National Eye Instit…	Bright artificial light suppressed nocturnal secretion of melatonin in six normal human subjects. Room light of less intensity, which is sufficient to suppress melatonin secretion in other mammals, failed to do so in humans. In contrast to the results of previous experiments in which ordinary room light was used, these findings establish that the human response to light is qualitatively similar t…		melatonin; endocrine system; human cell; light; normal human; pineal body; supraoptic nucleus; Circadian Rhythm; Dose-Response Relationship, Radiation; Female; Humans; Light; Male; Melatonin; Pineal Gland; Secretory Rate; Mammalia		melatonin, 73-31-4; Melatonin, 73-31-4							Lewy, A.J.; Clinical Psychobiology Branch, National Institute of Mental Health, Bethesda, MD 20205, United States								368075			7434030	English		Article	Final		Scopus	2-s2.0-0019202320	1980_Lewy_Light	1980_Lewy_Light.pdf	https://sci-hub.se/10.1126/science.7434030	Y
Brainard G.C., Hanifin J.R., Greeson J.M., Byrne B., Glickman G., Gerner E., Rollag M.D.	7003540124;7102742786;6603018311;8336699800;7003492763;8336699900;7004476998;	Action spectrum for melatonin regulation in humans: Evidence for a novel circadian photoreceptor	2001	Journal of Neuroscience	21	16		6405	6412		1048	10.1523/jneurosci.21-16-06405.2001	https://www.scopus.com/inward/record.uri?eid=2-s2.0-0035882385&partnerID=40&md5=3c80f8bc5be9656b27ff372973450d91	Department of Neurology, Thomas Jefferson University, Philadelphia, PA 19107, United States; Department of Anatomy, Physiology and Genetics, Uniformed Services University of Health Sciences, Bethesda, MD 20814, United States; Department of Neurology, Thomas Jefferson University, 1025 Walnut Street, Philadelphia, PA 19107, United States	Brainard, G.C., Department of Neurology, Thomas Jefferson University, Philadelphia, PA 19107, United States, Department of Neurology, Thomas Jefferson University, 1025 Walnut Street, Philadelphia, PA 19107, United States; Hanifin, J.R., Department of Neurology, Thomas Jefferson University, Philadelphia, PA 19107, United States; Greeson, J.M., Department of Neurology, Thomas Jefferson University, …	The photopigment in the human eye that transduces light for circadian and neuroendocrine regulation, is unknown. The aim of this study was to establish an action spectrum for light-induced melatonin suppression that could help elucidate the ocular photoreceptor system for regulating the human pineal gland. Subjects (37 females, 35 males, mean age of 24.5 ± 0.3 years) were healthy and had normal c…	Action spectrum; Circadian; Human; Light; Melatonin; Neuroendocrine; Photopigment; Photoreception; Pineal gland; Wavelength	melatonin; opsin; pigment; retinal; adult; article; circadian rhythm; color vision; female; hormonal regulation; hormone action; hormone release; human; human experiment; light exposure; male; normal human; photoreceptor; priority journal; retina cone; retina rod; NASA Discipline Regulatory Physiology; Non-NASA Center; Adolescent; Adult; Circadian Rhythm; Dose-Response Relationship, Radiation; Ey…		Melatonin, 73-31-4; Mydriatics; Opsin							Brainard, G.C.; Department of Neurology, Thomas Jefferson University, 1025 Walnut Street, Philadelphia, PA 19107, United States; email: george.brainard@mail.tju.edu								2706474		JNRSD	11487664	English	J. Neurosci.	Article	Final		Scopus	2-s2.0-0035882385	2001_Brainard_Action	2001_Brainard_Action.pdf	https://sci-hub.se/10.1523/jneurosci.21-16-06405.2001	Y
Thapan K., Arendt J., Skene D.J.	8267252200;7101704924;21035951300;	An action spectrum for melatonin suppression: Evidence for a novel non-rod, non-cone photoreceptor system in humans	2001	Journal of Physiology	535	1		261	267		765	10.1111/j.1469-7793.2001.t01-1-00261.x	https://www.scopus.com/inward/record.uri?eid=2-s2.0-0035880993&doi=10.1111%2fj.1469-7793.2001.t01-1-00261.x&partnerID=40&md5=75a33fc14b07f7295f701322c4df3271	Centre for Chronobiology, School of Biomedical and Life Sciences, University of Surrey, Guildford, Surrey GU2 7XH, United Kingdom; School of Biomedical and Life Sciences, University of Surrey, Guildford GU2 7XH, United Kingdom	Thapan, K., Centre for Chronobiology, School of Biomedical and Life Sciences, University of Surrey, Guildford, Surrey GU2 7XH, United Kingdom; Arendt, J., Centre for Chronobiology, School of Biomedical and Life Sciences, University of Surrey, Guildford, Surrey GU2 7XH, United Kingdom; Skene, D.J., Centre for Chronobiology, School of Biomedical and Life Sciences, University of Surrey, Guildford, S…	1. Non-image forming, irradiance-dependent responses mediated by the human eye include synchronisation of the circadian axis and suppression of pineal melatonin production. The retinal photopigment(s) transducing these light responses in humans have not been characterised. 2. Using the ability of light to suppress nocturnal melatonin production, we aimed to investigate its spectral sensitivity an…		cryptochrome; melatonin; rhodopsin; visual pigment; cryptochrome 1; cryptochrome 2; rhodopsin; adult; article; circadian rhythm; controlled study; eye; female; hormone synthesis; human; light; light absorption; male; night; night vision; nomogram; normal human; photopic vision; photoreceptor; pineal body; priority journal; retina cone; retina rod; spectral sensitivity; volunteer; action spectrum;…		Melatonin, 73-31-4; Opsin; Rhodopsin, 9009-81-8; melatonin, 73-31-4; rhodopsin, 60383-01-9, 9009-81-8							Skene, D.J.; School of Biomedical/Life Sciences, University of Surrey, Center for Chronobiology, Guildford, Surrey GU2 7XH, United Kingdom; email: d.skene@surrey.ac.uk								223751		JPHYA	11507175	English	J. Physiol.	Article	Final		Scopus	2-s2.0-0035880993	2001_Thapan_An	2001_Thapan_An.pdf	https://sci-hub.se/10.1111/j.1469-7793.2001.t01-1-00261.x	Y
Schernhammer E.S., Laden F., Speizer F.E., Willett W.C., Hunter D.J., Kawachi I., Colditz G.A.	7004207502;56752552900;35380894300;56803239300;56447806500;7103096477;57206520256;	Rotating night shifts and risk of breast cancer in women participating in the nurses' health study	2001	Journal of the National Cancer Institute	93	20		1563	1568		745	10.1093/jnci/93.20.1563	https://www.scopus.com/inward/record.uri?eid=2-s2.0-0035904335&doi=10.1093%2fjnci%2f93.20.1563&partnerID=40&md5=0aa8ef1f4fe44096de0708b427f9fe57	Department of Medicine, Brigham and Women's Hospital, Harvard Medical School, Boston, MA, United States; Department for Environmental Health, Harvard School of Public Health, Boston, MA, United States; Departments of Epidemiology and Nutrition, Harvard School of Public Health, Boston, MA, United States; Department of Epidemiology, Harvard School of Public Health, Harvard Center for Cancer Prevent…	Schernhammer, E.S., Department of Medicine, Brigham and Women's Hospital, Harvard Medical School, Boston, MA, United States, Channing Laboratory, 181 Longwood Ave, Boston, MA 02115, United States; Laden, F., Department of Medicine, Brigham and Women's Hospital, Harvard Medical School, Boston, MA, United States, Department for Environmental Health, Harvard School of Public Health, Boston, MA, Unit…	Background: Melatonin shows potential oncostatic action, and light exposure during night suppresses melatonin production. There is little information, however, about the direct effect of night work on the risk of cancer. We investigated the effect of night work in breast cancer. Methods: We examined the relationship between breast cancer and working on rotating night shifts during 10 years of fol…		melatonin; article; breast cancer; calculation; cancer incidence; cancer risk; controlled study; female; follow up; human; light exposure; major clinical study; medical documentation; medical information; multivariate analysis; night work; nurse; priority journal; regression analysis; shift worker; statistical analysis		melatonin, 73-31-4							Colditz, G.A.; Nurses' Health Study, Channing Laboratory, 181 Longwood Ave., Boston, MA 02115, United States			Oxford University Press					278874		JNCIA	11604480	English	J. Natl. Cancer Inst.	Article	Final	Open Access	Scopus	2-s2.0-0035904335	2001_Schernhammer_Rotating	2001_Schernhammer_Rotating.pdf	https://sci-hub.se/10.1093/jnci/93.20.1563	Y
Zeitzer J.M., Dijk D.-J., Kronauer R.E., Brown E.N., Czeisler C.A.	6602853952;7007018167;57196395263;57201225828;7006224092;	Sensitivity of the human circadian pacemaker to nocturnal light: Melatonin phase resetting and suppression	2000	Journal of Physiology	526	3		695	702		651	10.1111/j.1469-7793.2000.00695.x	https://www.scopus.com/inward/record.uri?eid=2-s2.0-0033841139&doi=10.1111%2fj.1469-7793.2000.00695.x&partnerID=40&md5=94c3f10221cd6ee2227ea129a9326fe0	Program in Neuroscience, Harvard Medical School, Boston, MA 02115, United States; Department of Medicine, Harvard Medical School, Brigham and Women's Hospital, Boston, MA 02115, United States; Division of Applied Sciences, Harvard University, Cambridge, MA 02138, United States; MIT Division of Health Sciences and Technology, Medical Education Center 213, Boston, MA 02115, United States; Departmen…	Zeitzer, J.M., Program in Neuroscience, Harvard Medical School, Boston, MA 02115, United States, Department of Medicine, Harvard Medical School, Brigham and Women's Hospital, Boston, MA 02115, United States, Department of Neurology, UCLA School of Medicine, Los Angeles, CA 90095, United States; Dijk, D.-J., Department of Medicine, Harvard Medical School, Brigham and Women's Hospital, Boston, MA 0…	1. Ocular exposure to early morning room light can significantly advance the timing of the human circadian pacemaker. The resetting response to such light has a non-linear relationship to illuminance. The dose-response relationship of the human circadian pacemaker to late evening light of dim to moderate intensity has not been well established. 2. Twenty-three healthy young male and female volunt…		melatonin; adult; article; brightness; circadian rhythm; controlled study; female; hormone blood level; human; human experiment; illumination; light; light exposure; male; night; normal human; pacemaker; priority journal; stimulus response; Article; circadian pacemaker; dose response; hormone action; melatonin blood level; melatonin suppression; nocturnal light		melatonin, 73-31-4							Czeisler, C.A.; Neuroendocrine/Sleep Disorders Sec., Harvard Medical School, Brigham and Women's Hospital, 221 Longwood Avenue, Boston, MA 02115, United States; email: caczeisler@gere.bwh.harvard.edu			Cambridge University Press					223751		JPHYA	10922269	English	J. Physiol.	Article	Final		Scopus	2-s2.0-0033841139	2000_Zeitzer_Sensitivity	2000_Zeitzer_Sensitivity.pdf	https://sci-hub.se/10.1111/j.1469-7793.2000.00695.x	Y
Klein D.C., Weller J.L.	7402360691;35508815600;	Indole metabolism in the pineal gland: A circadian rhythm in N-acetyltransferase	1970	Science	169	3950		1093	1095		621	10.1126/science.169.3950.1093	https://www.scopus.com/inward/record.uri?eid=2-s2.0-0014941795&doi=10.1126%2fscience.169.3950.1093&partnerID=40&md5=a982d3750c59458a1d504417de382133	Section on Physiological Controls, Laboratory of Biomedical Sciences, National Institute of Child Health and Human Development, Bethesda, MD 20014, United States	Klein, D.C., Section on Physiological Controls, Laboratory of Biomedical Sciences, National Institute of Child Health and Human Development, Bethesda, MD 20014, United States; Weller, J.L., Section on Physiological Controls, Laboratory of Biomedical Sciences, National Institute of Child Health and Human Development, Bethesda, MD 20014, United States	The activity of N-acetyltransferase in the rat pineal gland is more than 15 times higher at night than during the day. This circadian rhythm persists in complete darkness, or in blinded animals, and is suppressed in constant lighting. The N-acetyltransferase rhythm is 180° out of phase with the serotonin rhythm and is similar to the norepinephrine and melatonin rhythms. Experiments in vitro indic…		adrenalin; aniline derivative; carbon; melatonin; noradrenalin; octopamine; serotonin; transferase; animal; article; biosynthesis; circadian rhythm; enzymology; light; male; metabolism; pineal body; radiation response; rat; stimulation; Aniline Compounds; Animal; Carbon Isotopes; Circadian Rhythm; Epinephrine; Light; Male; Melatonin; Norepinephrine; Octopamine; Pineal Gland; Radiation Effects; Ra…		adrenalin, 51-43-4, 55-31-2, 6912-68-1; carbon, 7440-44-0; melatonin, 73-31-4; noradrenalin, 1407-84-7, 51-41-2; octopamine, 104-14-3; serotonin, 50-67-9; transferase, 9047-61-4; Aniline Compounds; Carbon Isotopes; Epinephrine, 51-43-4; Melatonin, 73-31-4; Norepinephrine, 51-41-2; Octopamine, 104-14-3; Serotonin, 50-67-9; Transferases, EC 2.							Klein, D.C.; Section on Physiological Controls, Laboratory of Biomedical Sciences, National Institute of Child Health and Human Development, Bethesda, MD 20014, United States								368075			4915470	English		Article	Final		Scopus	2-s2.0-0014941795	1970_Klein_Indole	1970_Klein_Indole.pdf	https://sci-hub.se/10.1126/science.169.3950.1093	Y
Davis S., Mirick D.K., Stevens R.G.	55465579200;6506871448;56788478400;	Night shift work, light at night, and risk of breast cancer	2001	Journal of the National Cancer Institute	93	20		1557	1562		613	10.1093/jnci/93.20.1557	https://www.scopus.com/inward/record.uri?eid=2-s2.0-0035904292&doi=10.1093%2fjnci%2f93.20.1557&partnerID=40&md5=f32d345c5098e0db39111af4020121b1	Program in Epidemiology, Division of Public Health Sciences, Fred Hutchinson Cancer Research Center, Seattle, WA, United States; Department of Community Medicine, University of Connecticut Health Center, Farmington, CT, United States; Program in Epidemiology, Division of Public Health Sciences, Fred Hutchinson Cancer Research Center, 1100 Fairview Ave., N., Seattle, WA 98109-1024, United States	Davis, S., Program in Epidemiology, Division of Public Health Sciences, Fred Hutchinson Cancer Research Center, 1100 Fairview Ave., N., Seattle, WA 98109-1024, United States; Mirick, D.K., Program in Epidemiology, Division of Public Health Sciences, Fred Hutchinson Cancer Research Center, Seattle, WA, United States; Stevens, R.G., Department of Community Medicine, University of Connecticut Health…	Background: Exposure to light at night may increase the risk of breast cancer by suppressing the normal nocturnal production of melatonin by the pineal gland, which, in turn, could increase the release of estrogen by the ovaries. This study investigated whether such exposure is associated with an increased risk of breast cancer in women. Methods: Case patients (n = 813), aged 20-74 years, were di…		estrogen; melatonin; adult; aged; article; breast cancer; cancer risk; controlled study; estrogen release; female; human; information processing; interview; light exposure; major clinical study; night work; occupation; ovary; pineal body; priority journal; regression analysis; shift worker; sleep; telephone		melatonin, 73-31-4							Davis, S.; Program in Epidemiology, Division of Public Health Sciences, Fred Hutchinson Cancer Research Ctr., 1100 Fairview Ave., Seattle, WA 98109-1024, United States; email: sdavis@fhcrc.org			Oxford University Press					278874		JNCIA	11604479	English	J. Natl. Cancer Inst.	Article	Final	Open Access	Scopus	2-s2.0-0035904292	2001_Davis_Night	2001_Davis_Night.pdf	https://sci-hub.se/10.1093/jnci/93.20.1557	Y
Lewy A.J., Ahmed S., Jackson J.M.L., Sack R.L.	7004848014;57198883720;57199275380;7102549707;	Melatonin shifts human circadian rhythms according to a phase-response curve	1992	Chronobiology International	9	5		380	392		588	10.3109/07420529209064550	https://www.scopus.com/inward/record.uri?eid=2-s2.0-0026661007&doi=10.3109%2f07420529209064550&partnerID=40&md5=15350eba442bd6bc7f8038c9446f73a4	Sleep and Mood Disorders Laboratory, Departments of Psychiatry, Ophthalmology and Pharmacology, Oregon Health Sciences University, Portland, Oregon, United States	Lewy, A.J., Sleep and Mood Disorders Laboratory, Departments of Psychiatry, Ophthalmology and Pharmacology, Oregon Health Sciences University, Portland, Oregon, United States; Ahmed, S., Sleep and Mood Disorders Laboratory, Departments of Psychiatry, Ophthalmology and Pharmacology, Oregon Health Sciences University, Portland, Oregon, United States; Jackson, J.M.L., Sleep and Mood Disorders Labora…	A physiological dose of orally administered melatonin shifts circadian rhythms in humans according to a phase-response curve (PRC) that is nearly opposite in phase with the PRCs for light exposure: melatonin delays circadian rhythms when administered in the morning and advances them when administered in the afternoon or early evening. The human melatonin PRC provides critical information for usin…	Circadian phase shifts; Circadian phase sleep and mood disorders; Dim light melatonin onset (DLMO); Melatonin administration; Phase-response curve (PRC)	melatonin; placebo; adult; article; circadian rhythm; controlled study; dose time effect relation; female; human; human experiment; light dark cycle; male; mood; normal human; oral drug administration; sleep; Adult; Circadian Rhythm; Darkness; Female; Human; Light; Male; Melatonin; Middle Age; Sleep; Support, U.S. Gov't, P.H.S.; Suprachiasmatic Nucleus		melatonin, 73-31-4; Melatonin, 73-31-4		regis, United States	CRC	Acknowledgment: We wish to thank the nursing staff of the OHSU CRC and to acknowledge the assistance of Gregory Clarke, Mary Cardoza, Vance Bauer, Carol A. Gawryla, Neil L. Cutler, and Mary L. Blood. Supported by research grants MH 40161 (AJL), MH 00703 (AJL), and 5M01 RR 00334 (OHSU CRC).			Lewy, A.J.; Department of Psychiatry L469, Oregon Health Sciences University, 3181 SW Sam Jackson Park Road, Portland, OR,97201-3098, United States			Informa Healthcare					7420528		CHBIE	1394610	English	Chronobiol. Int.	Article	Final		Scopus	2-s2.0-0026661007	1992_Lewy_Melatonin	1992_Lewy_Melatonin.pdf	https://sci-hub.se/10.3109/07420529209064550	Y
Lewy A.J., Sack R.L., Stephen Miller L., Hoban T.M.	7004848014;7102549707;57019986500;7003894641;	Antidepressant and circadian phase-shifting effects of light	1987	Science	235	4786		352	354		540	10.1126/science.3798117	https://www.scopus.com/inward/record.uri?eid=2-s2.0-0023120917&doi=10.1126%2fscience.3798117&partnerID=40&md5=56ffe9e053d937d2ce09d0d32d16c5b4	Sleep and Mood Disorders, Laboratory, Departments Psyhiatry, Ophthalmology, and Pharmacology, Oregon Health Sciences University, Portland, OR 97201	Lewy, A.J., Sleep and Mood Disorders, Laboratory, Departments Psyhiatry, Ophthalmology, and Pharmacology, Oregon Health Sciences University, Portland, OR 97201; Sack, R.L., Sleep and Mood Disorders, Laboratory, Departments Psyhiatry, Ophthalmology, and Pharmacology, Oregon Health Sciences University, Portland, OR 97201; Stephen Miller, L., Sleep and Mood Disorders, Laboratory, Departments Psyhiat…	Bright light can suppress nighttime melatonin a production in humans, but ordinary indoor light does not have this effect. This findings suggested that bright light may have other chronobiologic effects in humans as well. Eight patients who regularly became depressed in the winter (as day length shortens) signifcantly improved after 1 week of exposure to bright light in the morning (but not after…		ELECTRIC LAMPS; ELECTRIC LIGHTING; LIGHT; ANTIDEPRESSANT EFFECTS OF LIGHT; BRIGHT LIGHT EFFECTS; CHRONOBIOLOGIC EFFECTS IN HUMANS; CIRCADIAN PHASE-SHIFTING EFFECTS OF LIGHT; MELATONIN PRODUCTION; BIOMEDICAL ENGINEERING; melatonin; adult; case report; central nervous system; circadian rhythm; depression; human; light; priority journal; psychological aspect; therapy; Circadian Rhythm; Depression; H…		melatonin, 73-31-4; Melatonin, 73-31-4							Lewy, A.J.; Sleep and Mood Disorders, Laboratory, Departments Psyhiatry, Ophthalmology, and Pharmacology, Oregon Health Sciences University, Portland, OR 97201								368075			3798117	English		Article	Final		Scopus	2-s2.0-0023120917	1987_Lewy_Antidepressant	1987_Lewy_Antidepressant.pdf	https://sci-hub.se/10.1126/science.3798117	Y
Schernhammer E.S., Laden F., Speizer F.E., Willet W.C., Hunter D.J., Kawachi I., Fuchs C.S., Colditz G.A.	7004207502;56752552900;35380894300;56803239300;56447806500;7103096477;7202461389;57206520256;	Night-shift work and risk of colorectal cancer in the Nurses' Health Study	2003	Journal of the National Cancer Institute	95	11		825	828		507	10.1093/jnci/95.11.825	https://www.scopus.com/inward/record.uri?eid=2-s2.0-0037704257&doi=10.1093%2fjnci%2f95.11.825&partnerID=40&md5=d0e247a0e6f5e0b36a356d09195da545	Channing Laboratory, Department of Medicine, Brigham/Women's Hosp./Harvard, 181 Longwood Ave., Boston, MA 02115, United States; Ludwig Boltzmann-Institute, Applied Cancer Research, Kaiser Franz-Josef-Spital, Vienna, Austria; Dept. for Environ. Health, Harvard Sch. of Pub. Htlh./Epidemiol, Dana-Farber Cancer Institute, Boston, MA, United States; Department of Epidemiology, Harvard School of Public…	Schernhammer, E.S., Channing Laboratory, Department of Medicine, Brigham/Women's Hosp./Harvard, 181 Longwood Ave., Boston, MA 02115, United States, Ludwig Boltzmann-Institute, Applied Cancer Research, Kaiser Franz-Josef-Spital, Vienna, Austria; Laden, F., Channing Laboratory, Department of Medicine, Brigham/Women's Hosp./Harvard, 181 Longwood Ave., Boston, MA 02115, United States, Dept. for Envir…	Exposure to light at night suppresses the physiologic production of melatonin, a hormone that has antiproliferative effects on intestinal cancers. Although observational studies have associated night-shift work with an increased risk of breast cancer, the effect of night-shift work on the risk of other cancers is not known. We prospectively examined the relationship between working rotating night…		melatonin; melatonin; adult; aged; article; breast cancer; cancer inhibition; cancer risk; colorectal cancer; controlled study; female; follow up; human; intestine cancer; light exposure; major clinical study; medical documentation; multivariate analysis; night work; priority journal; prospective study; blood; case control study; colorectal tumor; epidemiology; health survey; lifestyle; methodolo…		melatonin, 73-31-4; Melatonin, 73-31-4							Schernhammer, E.S.; Channing Laboratory, Department of Medicine, Brigham/Women's Hosp/Harvard, 181 Longwood Ave., Boston, MA 02115, United States; email: eva.schernhammer@channing.harvard.edu			Oxford University Press					278874		JNCIA	12783938	English	J. Natl. Cancer Inst.	Article	Final	Open Access	Scopus	2-s2.0-0037704257	2003_Schernhammer_Night-shift	2003_Schernhammer_Night-shift.pdf	https://sci-hub.se/10.1093/jnci/95.11.825	Y
Claustrat B., Brun J., Chazot G.	24494646700;7202514547;7005725003;	The basic physiology and pathophysiology of melatonin	2005	Sleep Medicine Reviews	9	1		11	24		486	10.1016/j.smrv.2004.08.001	https://www.scopus.com/inward/record.uri?eid=2-s2.0-11844277100&doi=10.1016%2fj.smrv.2004.08.001&partnerID=40&md5=1fa6cdd7a92e3fb65920eead87dc9f22	Ctr. de Méd. Nucléaire, Service de Radioanalyse, Hop. Neuro-Cardiologique, 59 B., France; Service de Neurologie, Hôpital Neuro-Cardiologique, Lyon, France, France	Claustrat, B., Ctr. de Méd. Nucléaire, Service de Radioanalyse, Hop. Neuro-Cardiologique, 59 B., France; Brun, J., Ctr. de Méd. Nucléaire, Service de Radioanalyse, Hop. Neuro-Cardiologique, 59 B., France; Chazot, G., Service de Neurologie, Hôpital Neuro-Cardiologique, Lyon, France, France	Melatonin is a methoxyindole synthesized and secreted principally by the pineal gland at night under normal environmental conditions. The endogenous rhythm of secretion is generated by the suprachiasmatic nuclei and entrained to the light/dark cycle. Light is able to either suppress or synchronize melatonin production according to the light schedule. The nycthohemeral rhythm of this hormone can b…	Circadian rhythms; Human; Melatonin; Pathophysiology; Physiology	4 aminobutyric acid; antineoplastic agent; benzodiazepine derivative; beta adrenergic receptor blocking agent; calcium antagonist; cisplatin; clonidine; dihydropyridine derivative; dopamine; dopamine receptor blocking agent; dopamine receptor stimulating agent; etoposide; fluvoxamine; folic acid; glutamic acid; melatonin; metirosine; monoamine oxidase inhibitor; neuropeptide Y; noradrenalin; opia…		4 aminobutyric acid, 28805-76-7, 56-12-2; cisplatin, 15663-27-1, 26035-31-4, 96081-74-2; clonidine, 4205-90-7, 4205-91-8, 57066-25-8; dopamine, 51-61-6, 62-31-7; etoposide, 33419-42-0, 433304-61-1; fluvoxamine, 54739-18-3; folic acid, 59-30-3, 6484-89-5; glutamic acid, 11070-68-1, 138-15-8, 56-86-0, 6899-05-4; melatonin, 73-31-4; metirosine, 672-87-7; neuropeptide Y, 82785-45-3, 83589-17-7; norad…										W.B. Saunders Ltd					10870792		SMREF		English	Sleep Med. Rev.	Article	Final		Scopus	2-s2.0-11844277100	2005_Claustrat_The	2005_Claustrat_The.pdf	https://sci-hub.se/10.1016/j.smrv.2004.08.001	Y
Lockley S.W., Brainard G.C., Czeisler C.A.	56751118900;7003540124;7006224092;	High sensitivity of the human circadian melatonin rhythm to resetting by short wavelength light	2003	Journal of Clinical Endocrinology and Metabolism	88	9		4502	4505		470	10.1210/jc.2003-030570	https://www.scopus.com/inward/record.uri?eid=2-s2.0-0141675944&doi=10.1210%2fjc.2003-030570&partnerID=40&md5=c3d2eeb0996f1cce593913c7df14a1d0	Division of Sleep Medicine, Brigham and Women's Hospital, Boston, MA 02115, United States; Division of Sleep Medicine, Harvard Medical School, Boston, MA 02115, United States; Department of Neurology, Jefferson Medical College, Thomas Jefferson University, Philadelphia, PA 19107, United States	Lockley, S.W., Division of Sleep Medicine, Brigham and Women's Hospital, Boston, MA 02115, United States, Division of Sleep Medicine, Harvard Medical School, Boston, MA 02115, United States; Brainard, G.C., Department of Neurology, Jefferson Medical College, Thomas Jefferson University, Philadelphia, PA 19107, United States; Czeisler, C.A., Division of Sleep Medicine, Brigham and Women's Hospital…	The endogenous circadian oscillator in mammals, situated in the suprachiasmatic nuclei, receives environmental photic input from specialized subsets of photoreceptive retinal ganglion cells. The human circadian pacemaker is exquisitely sensitive to ocular light exposure, even in some people who are otherwise totally blind. The magnitude of the resetting response to white light depends on the timi…		melatonin; adult; article; circadian rhythm; controlled study; human; light; light exposure; normal human; photon; photopic vision; pineal body; priority journal; Non-programmatic; Adult; Area Under Curve; Circadian Rhythm; Female; Humans; Light; Male; Melatonin; Pineal Gland; Saliva; Mammalia		melatonin, 73-31-4; Melatonin, 73-31-4							Lockley, S.W.; Division of Sleep Medicine, Brigham and Women's Hospital, Boston, MA 02115, United States								0021972X		JCEMA	12970330	English	J. Clin. Endocrinol. Metab.	Article	Final	Open Access	Scopus	2-s2.0-0141675944	2003_Lockley_High	2003_Lockley_High.pdf	https://sci-hub.se/10.1210/jc.2003-030570	Y
Cajochen C., Münch M., Kobialka S., Kräuchi K., Steiner R., Oelhafen P., Orgül S., Wirz-Justice A.	7003530216;8986126800;8268598800;7003651460;57197492489;57204296589;7006417447;7005425500;	High sensitivity of human melatonin, alertness, thermoregulation, and heart rate to short wavelength light	2005	Journal of Clinical Endocrinology and Metabolism	90	3		1311	1316		451	10.1210/jc.2004-0957	https://www.scopus.com/inward/record.uri?eid=2-s2.0-15944371341&doi=10.1210%2fjc.2004-0957&partnerID=40&md5=543a8b23370e94262f44830748d6de78	Centre for Chronobiology, Psychiatric University Clinic, CH-4025 Basel, Switzerland; Institute of Physics, University of Basel, CH-4056 Basel, Switzerland; Eye Clinic, University Hospital, CH-4012 Basel, Switzerland; Centre for Chronobiology, Psychiatric University Clinic, Wilhelm Kleinstr. 27, CH-4025 Basel, Switzerland	Cajochen, C., Centre for Chronobiology, Psychiatric University Clinic, CH-4025 Basel, Switzerland, Centre for Chronobiology, Psychiatric University Clinic, Wilhelm Kleinstr. 27, CH-4025 Basel, Switzerland; Münch, M., Centre for Chronobiology, Psychiatric University Clinic, CH-4025 Basel, Switzerland; Kobialka, S., Centre for Chronobiology, Psychiatric University Clinic, CH-4025 Basel, Switzerland…	Light can elicit acute physiological and alerting responses in humans, the magnitude of which depends on the timing, intensity, and duration of light exposure. Here, we report that the alerting response of light as well as its effects on thermoregulation and heart rate are also wavelength dependent. Exposure to 2 h of monochromatic light at 460 nm in the late evening induced a significantly great…		melatonin; melatonin; adult; alertness; article; body temperature; circadian rhythm; controlled study; heart rate; human; human experiment; light; male; normal human; photopic vision; photoreceptor; priority journal; sensitivity analysis; skin temperature; statistical significance; thermoregulation; vasoconstriction; color; light; metabolism; physiology; radiation exposure; retina cone; sleep sta…		melatonin, 73-31-4; Melatonin, 73-31-4							Cajochen, C.; Centre for Chronobiology, Psychiatric University Clinic, Wilhelm Kleinstr. 27, CH-4025 Basel, Switzerland; email: christian.cajochen@pukbasel.ch								0021972X		JCEMA	15585546	English	J. Clin. Endocrinol. Metab.	Article	Final	Open Access	Scopus	2-s2.0-15944371341	2005_Cajochen_High	2005_Cajochen_High.pdf	https://sci-hub.se/10.1210/jc.2004-0957	Y
Czeisler C.A., Shanahan T.L., Klerman E.B., Martens H., Brotman D.J., Emens J.S., Klein T., Rizzo J.F.	7006224092;7006153552;6701750101;57194838947;7004189042;6603612337;7202313626;7103216592;	Suppression of melatonin secretion in some blind patients by exposure to bright light	1995	New England Journal of Medicine	332	1		6	11		443	10.1056/NEJM199501053320102	https://www.scopus.com/inward/record.uri?eid=2-s2.0-0028891043&doi=10.1056%2fNEJM199501053320102&partnerID=40&md5=a5d3db90e9182e6872ce6ed8d67d91a1	Sleep Disorders and Circadian Medicine, Division of Endocrinology, Department of Medicine, Harvard Medical School and Brigham and Women's Hospital, United States; Department of Ophthalmology, Harvard Medical School, Massachusetts Eye and Ear Infirmary, Boston, United States	Czeisler, C.A., Sleep Disorders and Circadian Medicine, Division of Endocrinology, Department of Medicine, Harvard Medical School and Brigham and Women's Hospital, United States; Shanahan, T.L., Sleep Disorders and Circadian Medicine, Division of Endocrinology, Department of Medicine, Harvard Medical School and Brigham and Women's Hospital, United States; Klerman, E.B., Sleep Disorders and Circad…	Background: Complete blindness generally results in the loss of synchronization of circadian rhythms to the 24-hour day and in recurrent insomnia. However, some blind patients maintain circadian entrainment. We undertook this study to determine whether some blind patients' eyes convey sufficient photic information to entrain the hypothalamic circadian pacemaker and suppress melatonin secretion, d…		melatonin; melatonin receptor; adult; aged; article; blindness; body temperature; circadian rhythm; clinical article; controlled study; female; hormone blood level; hormone inhibition; human; insomnia; light dark cycle; male; photostimulation; priority journal; sleep waking cycle; Adolescent; Adult; Aged; Blindness; Circadian Rhythm; Female; Human; Light; Male; Melatonin; Middle Age; Photic Stimu…		melatonin, 73-31-4; Melatonin, 73-31-4							Rizzo, J.F.; Section on Sleep Disorders and Circadian Medicine, Division of Endocrinology, Department of Medicine, Harvard Medical School, Brigham and Women's Hospital, 221 Longwood Ave., Boston, MA 02115, United States								284793			7990870	English	New Engl. J. Med.	Article	Final		Scopus	2-s2.0-0028891043	1995_Czeisler_Suppression	1995_Czeisler_Suppression.pdf	https://sci-hub.se/10.1056/NEJM199501053320102	Y
Lucas R.J., Freedman M.S., Muñoz M., Garcia-Fernández J.-M., Foster R.G.	7201704107;7203068603;22135300300;9038711600;7402462300;	Regulation of the mammalian pineal by non-rod, non-cone, ocular photoreceptors	1999	Science	284	5413		505	507		366	10.1126/science.284.5413.505	https://www.scopus.com/inward/record.uri?eid=2-s2.0-0033574769&doi=10.1126%2fscience.284.5413.505&partnerID=40&md5=cc60bf66a2ed9e00ccd28a64e32d90b0	Department of Biology, Sir Alexander Fleming Building, Imp. Coll. Sci., Technol. and Med., London, SW7 2AZ, United Kingdom; Departmento de Morfol. y Biol. Cell., Universidad de Oviedo, Oviedo 33073, Spain	Lucas, R.J., Department of Biology, Sir Alexander Fleming Building, Imp. Coll. Sci., Technol. and Med., London, SW7 2AZ, United Kingdom; Freedman, M.S., Department of Biology, Sir Alexander Fleming Building, Imp. Coll. Sci., Technol. and Med., London, SW7 2AZ, United Kingdom; Muñoz, M., Departmento de Morfol. y Biol. Cell., Universidad de Oviedo, Oviedo 33073, Spain; Garcia-Fernández, J.-M., Depa…	In mammals, ocular photoreceptors mediate an acute inhibition of pineal melatonin by light. The effect of rod and cone loss on this response was assessed by combining the rd mutation with a transgenic ablation of cones (cl) to produce mice lacking both photoreceptor classes. Despite the loss of all known retinal photoreceptors, rd/rd cl mice showed normal suppression of pineal melatonin in respon…		melatonin; article; gene mutation; immunocytochemistry; light; mammal; photoreceptor; physiology; pineal body; priority journal; retina cone; retina rod; transgene; Animals; Biological Clocks; Circadian Rhythm; Darkness; Drosophila Proteins; Eye Proteins; Flavoproteins; Light; Melatonin; Mice; Mice, Inbred C3H; Mice, Transgenic; Photoreceptors, Invertebrate; Photoreceptors, Vertebrate; Phototrans…		cryptochrome protein, Drosophila; cryptochrome; Drosophila Proteins; Eye Proteins; Flavoproteins; Melatonin, 73-31-4; Receptors, G-Protein-Coupled; Retinal Pigments							Lucas, R.J.; Department of Biology, Sir Alexander Fleming Building, Imperial College of Science, London SW7 2AZ, United Kingdom; email: r.j.lucas@ic.ac.uk								368075		SCIEA	10205062	English	Science	Article	Final		Scopus	2-s2.0-0033574769	1999_Lucas_Regulation	1999_Lucas_Regulation.pdf	https://sci-hub.se/10.1126/science.284.5413.505	Y
Cajochen C., Zeitzer J.M., Czeisler C.A., Dijk D.-J.	7003530216;6602853952;7006224092;7007018167;	Dose-response relationship for light intensity and ocular and electroencephalographic correlates of human alertness	2000	Behavioural Brain Research	115	1		75	83		342	10.1016/S0166-4328(00)00236-9	https://www.scopus.com/inward/record.uri?eid=2-s2.0-0033829618&doi=10.1016%2fS0166-4328%2800%2900236-9&partnerID=40&md5=37a641a21b3cb4fc39390b259ecb361d	Department of Medicine, Harvard Medical School, Brigham and Women’s Hospital, Boston, MA 02115, United States	Cajochen, C., Department of Medicine, Harvard Medical School, Brigham and Women’s Hospital, Boston, MA 02115, United States; Zeitzer, J.M., Department of Medicine, Harvard Medical School, Brigham and Women’s Hospital, Boston, MA 02115, United States; Czeisler, C.A., Department of Medicine, Harvard Medical School, Brigham and Women’s Hospital, Boston, MA 02115, United States; Dijk, D.-J., Departme…	Light can elicit both circadian and acute physiological responses in humans. In a dose response protocol men and women were exposed to illuminances ranging from 3 to 9100 lux for 6.5 h during the early biological night after they had been exposed to<3 lux for several hours. Light exerted an acute alerting response as assessed by a reduction in the incidence of slow-eye movements, a reduction of E…	Acute effect of light; Circadian rhythm; Illuminance; Logistic regression model; Melatonin suppression; Spectral analysis	melatonin; adult; alertness; alpha rhythm; article; circadian rhythm; controlled study; electroencephalography; eye movement; female; hormone blood level; human; human experiment; human tissue; light exposure; male; normal human; priority journal; somnolence; theta rhythm; NASA Discipline Space Human Factors; Non-NASA Center; Adolescent; Adult; Algorithms; Arousal; Body Temperature; Dose-Response…		melatonin, 73-31-4; Melatonin, 73-31-4			National Aeronautics and Space Administration: NAS9-19435 Cement Association of Canada: NCC 9-58 National Space Biomedical Research Institute National Institute of Mental Health: RO1 MH45130 823A-046640	We thank the subject volunteers and the research technicians for their help. Dr Sat Bir S. Khalsa for his helpful comments on an earlier version of the manuscript and Ms J. Jackson and Mr J.M. Ronda for their technical support. Research supported by grants from the NASA (NAS9-19435), NIMH (RO1 MH45130) to CAC and by the NASA Cooperative Agreement NCC 9-58 with the National Space Biomedical Resear…											1664328			10996410	English	Behav. Brain Res.	Article	Final		Scopus	2-s2.0-0033829618	2000_Cajochen_Dose-response	2000_Cajochen_Dose-response.pdf	https://sci-hub.se/10.1016/S0166-4328(00)00236-9	Y
Cagnacci A., Elliott J.A., Yen S.S.C.	7005516868;35757353900;7402687136;	Melatonin: A major regulator of the circadian rhythm of core temperature in humans	1992	Journal of Clinical Endocrinology and Metabolism	75	2		447	452		326	10.1210/jcem.75.2.1639946	https://www.scopus.com/inward/record.uri?eid=2-s2.0-0026730366&doi=10.1210%2fjcem.75.2.1639946&partnerID=40&md5=fb1f6cff72fb854be0c436baf86e38d8	Department of Reproductive Medicine and General Clinical Research Center, University of California-San Diego School of Medicine, 0802, La Jolla, CA, 92093-0802, United States	Cagnacci, A., Department of Reproductive Medicine and General Clinical Research Center, University of California-San Diego School of Medicine, 0802, La Jolla, CA, 92093-0802, United States; Elliott, J.A., Department of Reproductive Medicine and General Clinical Research Center, University of California-San Diego School of Medicine, 0802, La Jolla, CA, 92093-0802, United States; Yen, S.S.C., Depar…	The circadian rhythm of core body temperature (BTc), with maxima during the day and minima at night, is normally coupled with the sleep-wake cycle. Pineal melatonin secretion occurs contemporaneously during the nighttime hours and is mediated by the activation of β-adrenergic receptors during darkness. The hypothesis that nocturnal melatonin secretion may be involved in the regulation of the huma…		atenolol; melatonin; placebo; adult; article; circadian rhythm; controlled study; core temperature; female; follicular phase; hormonal regulation; hormone action; hormone blood level; hormone release; human; human experiment; menstrual cycle; normal human; oral drug administration; pineal body; priority journal; shift worker; sleep waking cycle; thermoregulation; Adult; Atenolol; Body Temperature…		Atenolol, 29122-68-7; Melatonin, 73-31-4; Placebos		sigma, United States					Yen, S.; Department of Reproductive Medicine, University of Califor-nia-San Diego, School of Medicine, La Jolla, CA, 92093, Netherlands								0021972X			1639946	English	J. Clin. Endocrinol. Metab.	Article	Final		Scopus	2-s2.0-0026730366	1992_Cagnacci_Melatonin:	1992_Cagnacci_Melatonin:.pdf	https://sci-hub.se/10.1210/jcem.75.2.1639946	Y
Gooley J.J., Lu J., Fischer D., Saper C.B.	6506691564;57199237874;7402955310;7103374507;	A broad role for melanopsin in nonvisual photoreception	2003	Journal of Neuroscience	23	18		7093	7106		322	10.1523/jneurosci.23-18-07093.2003	https://www.scopus.com/inward/record.uri?eid=2-s2.0-0043127450&partnerID=40&md5=bb408771c2d37434a110f6fcf5ac3f20	Department of Neurology, Beth Israel Deaconess Medical Center, Boston, MA 02215, United States; Program in Neuroscience, Harvard Medical School, Boston, MA 02115, United States; Labs. Neurosci. Res. in Neurosurg., Children's Hospital, Boston, MA 02115, United States; Department of Neurology, Beth Israel Deaconess Medical Center, 330 Brookline Avenue, Boston, MA 02215, United States	Gooley, J.J., Department of Neurology, Beth Israel Deaconess Medical Center, Boston, MA 02215, United States, Program in Neuroscience, Harvard Medical School, Boston, MA 02115, United States; Lu, J., Department of Neurology, Beth Israel Deaconess Medical Center, Boston, MA 02215, United States, Program in Neuroscience, Harvard Medical School, Boston, MA 02115, United States; Fischer, D., Labs. Ne…	The rod and cone photoreceptors that mediate visual phototransduction in mammals are not required for light-induced circadian entrainment, negative masking of locomotor activity, suppression of pineal melatonin, or the pupillary light reflex. The photopigment melanopsin has recently been identified in intrinsically photosensitive retinal ganglion cells (RGCs) that project to the suprachiasmatic n…	Adeno-associated virus; Circadian; Entrainment; Ganglion cells; Hypothalamus; Intergeniculate; Masking; Melanopsin; Pretectal; Pupillary light reflex; Retina; Sleep; Subparaventricular; Suprachiasmatic; Ventrolateral preoptic nucleus	melanopsin; messenger RNA; unclassified drug; visual pigment; animal cell; animal experiment; animal tissue; article; circadian rhythm; controlled study; lateral geniculate body; male; nonhuman; olivary nucleus; preoptic nucleus; pretectum; priority journal; protein expression; rat; retina ganglion cell; sleep waking cycle; superior colliculus; suprachiasmatic nucleus; visual masking; Animals; Ce…		melanopsin, 403476-86-8; Cholera Toxin, 9012-63-9; Green Fluorescent Proteins, 147336-22-9; Luminescent Proteins; melanopsin; Opsin; RNA, Messenger							Saper, C.B.; Department of Neurology, Beth Israel Deaconess Medical Center, 330 Brookline Avenue, Boston, MA 02215, United States; email: csaper@caregroup.harvard.edu								2706474		JNRSD	12904470	English	J. Neurosci.	Article	Final		Scopus	2-s2.0-0043127450	2003_Gooley_A	2003_Gooley_A.pdf	https://sci-hub.se/10.1523/jneurosci.23-18-07093.2003	Y
Schernhammer E.S., Kroenke C.H., Laden F., Hankinson S.E.	7004207502;6601935569;56752552900;7102950324;	Night work and risk of breast cancer	2006	Epidemiology	17	1		108	111		319	10.1097/01.ede.0000190539.03500.c1	https://www.scopus.com/inward/record.uri?eid=2-s2.0-33644876181&doi=10.1097%2f01.ede.0000190539.03500.c1&partnerID=40&md5=651734716d6211995f5fa58ada6e018d	Department of Medicine, Brigham and Women's Hospital, Harvard Medical School, Boston, MA, United States; Ludwig Boltzmann-Institute for Applied Cancer Research, KFJ-Spital, Appl. Cancer Res.-Institute for Translational Research Vienna (LBI-ACR VIEnna and ACR-ITR VIEnna), Austria; Department of Epidemiology, Harvard School of Public Health, Boston, MA, United States; Department of Environmental He…	Schernhammer, E.S., Department of Medicine, Brigham and Women's Hospital, Harvard Medical School, Boston, MA, United States, Ludwig Boltzmann-Institute for Applied Cancer Research, KFJ-Spital, Appl. Cancer Res.-Institute for Translational Research Vienna (LBI-ACR VIEnna and ACR-ITR VIEnna), Austria, Channing Laboratory, 181 Longwood Avenue, Boston, MA 02115, United States; Kroenke, C.H., Departme…	Background: Melatonin shows potential oncostatic activity and is acutely suppressed by light exposure. Some evidence suggests an association between night work and breast cancer risk, possibly through the melatonin pathway. Methods: In a cohort of premenopausal nurses, we prospectively studied the relation between rotating night shift work and breast cancer risk. Total number of months during whi…		melatonin; adult; article; breast cancer; cancer invasion; cancer risk; confidence interval; female; follow up; human; light exposure; major clinical study; night work; nurse; premenopause; priority journal; proportional hazards model; prospective study; shift worker; breast tumor; cohort analysis; middle aged; United States; work schedule; Adult; Breast Neoplasms; Cohort Studies; Female; Humans;…		melatonin, 73-31-4							Schernhammer, E.S.; Channing Laboratory, 181 Longwood Avenue, Boston, MA 02115, United States; email: eva.schernhammer@channing.harvard.edu								10443983		EPIDE	16357603	English	Epidemiology	Article	Final		Scopus	2-s2.0-33644876181	2006_Schernhammer_Night	2006_Schernhammer_Night.pdf	https://sci-hub.se/10.1097/01.ede.0000190539.03500.c1	Y
Megdal S.P., Kroenke C.H., Laden F., Pukkala E., Schernhammer E.S.	15036068300;6601935569;56752552900;7102452915;7004207502;	Night work and breast cancer risk: A systematic review and meta-analysis	2005	European Journal of Cancer	41	13		2023	2032		303	10.1016/j.ejca.2005.05.010	https://www.scopus.com/inward/record.uri?eid=2-s2.0-27644485423&doi=10.1016%2fj.ejca.2005.05.010&partnerID=40&md5=b280f1fc78f86d13b09c265dbfa23877	Milken Community High School, Los Angeles, CA, United States; Department of Medicine, Brigham and Women's Hospital, Harvard Medical School, 181 Longwood Avenue, Boston, MA 02115, United States; Department of Epidemiology, Harvard School of Public Health, Boston, MA, United States; Exposure, Epidemiology, and Risk Program, Department of Environmental Health, Harvard School of Public Health, Boston…	Megdal, S.P., Milken Community High School, Los Angeles, CA, United States; Kroenke, C.H., Department of Medicine, Brigham and Women's Hospital, Harvard Medical School, 181 Longwood Avenue, Boston, MA 02115, United States, Department of Epidemiology, Harvard School of Public Health, Boston, MA, United States; Laden, F., Department of Medicine, Brigham and Women's Hospital, Harvard Medical School,…	The association between occupations that involve night shift work (a surrogate for exposure to light at night with subsequent melatonin suppression) and breast cancer risk is uncertain. We therefore conducted a systematic review and meta-analysis of observational studies to assess the effects of night work on breast cancer risk. Data sources were MEDLINE from January 1960 to January 2005, experts…	Breast cancer; Flight attendants; Night work	breast cancer; cancer risk; clinical trial; data base; human; MEDLINE; meta analysis; night work; priority journal; review; statistical analysis; systematic review									Schernhammer, E.S.; Department of Medicine, Brigham and Women's Hospital, Harvard Medical School, 181 Longwood Avenue, Boston, MA 02115, United States; email: eva.schernhammer@channing.harvard.edu			Elsevier Ltd					9598049		EJCAE	16084719	English	Eur. J. Cancer	Article	Final		Scopus	2-s2.0-27644485423	2005_Megdal_Night	2005_Megdal_Night.pdf	https://sci-hub.se/10.1016/j.ejca.2005.05.010	Y
Mclntyre I.M., Norman T.R., Burrows G.D., Armstrong S.M.	57191099254;7101661686;7202553584;55459530500;	Human Melatonin Suppression by Light is Intensity Dependent	1989	Journal of Pineal Research	6	2		149	156		302	10.1111/j.1600-079X.1989.tb00412.x	https://www.scopus.com/inward/record.uri?eid=2-s2.0-0024545763&doi=10.1111%2fj.1600-079X.1989.tb00412.x&partnerID=40&md5=7f3926f2784a5a17943d93fca75c1f9a	Psychoendocrine Research Unit, Department of Psychiatry, University of Melbourne, Austin Hospital, Heidelberg, Australia; Department of Psychology & Brain Behaviour Research Institute, Latrobe University, Bundoora, Australia	Mclntyre, I.M., Psychoendocrine Research Unit, Department of Psychiatry, University of Melbourne, Austin Hospital, Heidelberg, Australia; Norman, T.R., Psychoendocrine Research Unit, Department of Psychiatry, University of Melbourne, Austin Hospital, Heidelberg, Australia; Burrows, G.D., Psychoendocrine Research Unit, Department of Psychiatry, University of Melbourne, Austin Hospital, Heidelberg,…	Five intensities of artificial light were examined for the effect on nocturnal melatonin concentrations. Maximum suppression of melatonin following 1 hr of light at midnight was 71%, 67%, 44%, 38%, and 16% with intensities of 3,000, 1,000, 500, 350, and 200 lux (lx), respectively. In contrast to some previous reports, light of 1,000 lx intensity was sufficient to suppress melatonin to near daytim…	low light intensity; melatonin	melatonin; human; human experiment; light; normal human; Adult; Bipolar Disorder; Dose-Response Relationship, Radiation; Female; Human; Light; Lighting; Male; Melatonin; Reference Values; Support, Non-U.S. Gov't		melatonin, 73-31-4; Melatonin, 73-31-4							Mclntyre, I.M.; Psychoendocrine Research Unit, Department of Psychiatry, University of Melbourne, Austin Hospital, Heidelberg, Victoria, 3084, Australia								7423098			2915324	English	J. Pineal Res.	Article	Final		Scopus	2-s2.0-0024545763	1989_Mclntyre_Human	1989_Mclntyre_Human.pdf	https://sci-hub.se/10.1111/j.1600-079X.1989.tb00412.x	Y
Macchi M.M., Bruce J.N.	7004929936;7201835650;	Human pineal physiology and functional significance of melatonin	2004	Frontiers in Neuroendocrinology	25	2019-04-03		177	195		301	10.1016/j.yfrne.2004.08.001	https://www.scopus.com/inward/record.uri?eid=2-s2.0-10444245917&doi=10.1016%2fj.yfrne.2004.08.001&partnerID=40&md5=e4efed60a4ac6a5eb3a2945bcddf82b0	New York State Psychiatric Institute, College of Physicians and Surgeons, Columbia Univ., 1051 Riverside D., United States; Bartoli Brain Tum. Res. Laboratory, Neurological Institute, Columbia Presbyt. Med. Ctr. New Y., United States	Macchi, M.M., New York State Psychiatric Institute, College of Physicians and Surgeons, Columbia Univ., 1051 Riverside D., United States; Bruce, J.N., Bartoli Brain Tum. Res. Laboratory, Neurological Institute, Columbia Presbyt. Med. Ctr. New Y., United States	Descriptions of the pineal gland date back to antiquity, but its functions in humans are still poorly understood. In both diurnal and nocturnal vertebrates, its main product, the hormone melatonin, is synthesized and released in rhythmic fashion, during the dark portion of the day-night cycle. Melatonin production is controlled by an endogenous circadian timing system and is also suppressed by li…	Circadian rhythms; Melatonin; Pineal gland; Review; Sleep regulation	alprazolam; gamma interferon; interleukin 2; melanopsin; melatonin; melatonin receptor; monoamine oxidase inhibitor; anatomy; body temperature; cancer inhibition; cardiovascular system; circadian rhythm; histology; hormone action; hormone metabolism; hormone release; hormone synthesis; human; hypogonadism; immune system; infertility; insomnia; lymphocyte; lymphoid organ; mammal; medical literatur…		alprazolam, 28981-97-7; gamma interferon, 82115-62-6; interleukin 2, 85898-30-2; melanopsin, 403476-86-8; melatonin, 73-31-4			National Institute of Neurological Disorders and Stroke: R21 NS045086	We wish to thank Ziad Boulos Ph.D. for his careful reading of the manuscript and helpful suggestions. This work was supported by NINDS Grant R21 NS045086 (M.M.M.).						Academic Press Inc.					913022		FNEDA		English	Front. Neuroendocrinol.	Article	Final		Scopus	2-s2.0-10444245917	2004_Macchi_Human	2004_Macchi_Human.pdf	https://sci-hub.se/10.1016/j.yfrne.2004.08.001	Y
Chang A.-M., Aeschbach D., Duffy J.F., Czeisler C.A.	28567503000;6603015162;56494099000;7006224092;	Evening use of light-emitting eReaders negatively affects sleep, circadian timing, and next-morning alertness	2015	Proceedings of the National Academy of Sciences of the United States of America	112	4		1232	1237		299	10.1073/pnas.1418490112	https://www.scopus.com/inward/record.uri?eid=2-s2.0-84921712126&doi=10.1073%2fpnas.1418490112&partnerID=40&md5=5ab941da9385f4fe0008133ba45bf902	Division of Sleep and Circadian Disorders, Departments of Medicine and Neurology, Brigham and Women's Hospital, Boston, MA 02115, United States; Division of Sleep Medicine, Harvard Medical School, Boston, MA 02115, United States; Institute of Aerospace Medicine, German Aerospace Center, Cologne, 51147, Germany; Department of Biobehavioral Health, Pennsylvania State University, University ParkPA 1…	Chang, A.-M., Division of Sleep and Circadian Disorders, Departments of Medicine and Neurology, Brigham and Women's Hospital, Boston, MA 02115, United States, Division of Sleep Medicine, Harvard Medical School, Boston, MA 02115, United States, Department of Biobehavioral Health, Pennsylvania State University, University ParkPA 16802, United States; Aeschbach, D., Division of Sleep and Circadian D…	In the past 50 y, there has been a decline in average sleep duration and quality, with adverse consequences on general health. A representative survey of 1,508 American adults recently revealed that 90% of Americans used some type of electronics at least a few nights per week within 1 h before bedtime. Mounting evidence from countries around the world shows the negative impact of such technology …	Chronobiology; Digital media; Electronics; Phase-shifting; Sleep	melatonin; adult; alertness; Article; biological activity; book; circadian rhythm; clinical article; controlled study; crossover procedure; electronics; female; health; human; light exposure; male; polysomnography; priority journal; randomized controlled trial; reading; sleep; somnolence; task performance; adverse effects; blood; clinical trial; illumination; pathophysiology; reading; sleep disor…		melatonin, 73-31-4; Melatonin			National Institutes of Health, NIH: K01HL115458 National Aeronautics and Space Administration, NASA: NCC 9-58 National Aeronautics and Space Administration, NASA: NNX10AF47G National Institutes of Health, NIH: R01HL077453 National Institutes of Health, NIH: R01HL094654 National Center for Research Resources, NCRR: UL1 RR025758				Chang, A.-M.; Department of Biobehavioral Health, Pennsylvania State University, University ParkUnited States; email: amchang@psu.edu			National Academy of Sciences					278424		PNASA	25535358	English	Proc. Natl. Acad. Sci. U. S. A.	Article	Final	Open Access	Scopus	2-s2.0-84921712126	2015_Chang_Evening	2015_Chang_Evening.pdf	https://sci-hub.se/10.1073/pnas.1418490112	Y
Blask D.E., Brainard G.C., Dauchy R.T., Hanifin J.P., Davidson L.K., Krause J.A., Sauer L.A., Rivera-Bermudez M.A., Dubocovich M.L., Jasser S.A., Lynch D.T., Rollag M.D., Zalatan F.	7006151595;7003540124;7004364685;7102742786;55106670700;7202955193;7004486514;7801554686;7005904605;56633292700;7401568135;7004476998;6507836339;	Melatonin-depleted blood from premenopausal women exposed to light at night stimulates growth of human breast cancer xenografts in nude rats	2005	Cancer Research	65	23		11174	11184		284	10.1158/0008-5472.CAN-05-1945	https://www.scopus.com/inward/record.uri?eid=2-s2.0-28244481148&doi=10.1158%2f0008-5472.CAN-05-1945&partnerID=40&md5=ed03ab4c9da316639136dbc755b68036	Laboratory of Chrono-Neuroendocrine Oncology, Bassett Research Institute, Mary Imogene Bassett Hospital, Cooperstown, NY 13326, United States; Department of Neurology, Thomas Jefferson University, Philadelphia, PA, United States; Department of Molecular Pharmacology and Biological Chemistry, Northwestern University Feinberg School of Medicine, Chicago, IL, United States; Department of Anatomy, Ph…	Blask, D.E., Laboratory of Chrono-Neuroendocrine Oncology, Bassett Research Institute, Mary Imogene Bassett Hospital, Cooperstown, NY 13326, United States; Brainard, G.C., Department of Neurology, Thomas Jefferson University, Philadelphia, PA, United States; Dauchy, R.T., Laboratory of Chrono-Neuroendocrine Oncology, Bassett Research Institute, Mary Imogene Bassett Hospital, Cooperstown, NY 13326…	The increased breast cancer risk in female night shift workers has been postulated to result from the suppression of pineal melatonin production by exposure to light at night. Exposure of rats bearing rat hepatomas or human breast cancer xenografts to increasing intensities of white fluorescent light during each 12-hour dark phase (0-345 μW/cm2) resulted in a dose-dependent suppression of nocturn…		coriolic acid; linoleic acid; melatonin; mitogenic agent; pineal body hormone; adult; animal experiment; animal model; animal tissue; article; blood sampling; breast cancer; cancer growth; cancer risk; cell proliferation; controlled study; darkness; fatty acid metabolism; female; hormone blood level; hormone synthesis; human; human experiment; light exposure; liver cell carcinoma; male; night; no…	GENBANK: U14108, U14409, U25341, U28218	coriolic acid, 5204-88-6; linoleic acid, 1509-85-9, 2197-37-7, 60-33-3, 822-17-3; melatonin, 73-31-4; Melatonin, 73-31-4; Receptors, Melatonin; RNA, Messenger							Blask, D.E.; Laboratory of Chrono-Neuroendocrine Oncology, Bassett Research Institute, Mary Imogene Bassett Hospital, Cooperstown, NY 13326, United States; email: david.blask@bassett.org								85472		CNREA	16322268	English	Cancer Res.	Article	Final	Open Access	Scopus	2-s2.0-28244481148	2005_Blask_Melatonin-depleted	2005_Blask_Melatonin-depleted.pdf	https://sci-hub.se/10.1158/0008-5472.CAN-05-1945	Y
Lewy A.J., Bauer V.K., Ahmed S., Thomas K.H., Cutler N.L., Singer C.M., Moffit M.T., Sack R.L.	7004848014;7004992379;57198883720;57193363024;7103016719;7102316668;6603543975;7102549707;	The human phase response curve (PRC) to melatonin is about 12 hours out of phase with the PRC to light	1998	Chronobiology International	15	1		71	83		271	10.3109/07420529808998671	https://www.scopus.com/inward/record.uri?eid=2-s2.0-0031911537&doi=10.3109%2f07420529808998671&partnerID=40&md5=13fb46c46e39fe744ae7bf397ac292e0	Sleep and Mood Disorders Laboratory, Depts. Psychiat., Ophthalmol., P., Oregon Health Sciences University, Portland, OR 97201-3098, United States; Sleep and Mood Disorders Laboratory, L469, Oregon Health Sciences University, Portland, OR 97201-3098, United States	Lewy, A.J., Sleep and Mood Disorders Laboratory, Depts. Psychiat., Ophthalmol., P., Oregon Health Sciences University, Portland, OR 97201-3098, United States, Sleep and Mood Disorders Laboratory, L469, Oregon Health Sciences University, Portland, OR 97201-3098, United States; Bauer, V.K., Sleep and Mood Disorders Laboratory, Depts. Psychiat., Ophthalmol., P., Oregon Health Sciences University, Po…	Melatonin's timekeeping function is undoubtedly related to the fact that it is primarily produced during nighttime darkness; that is, melatonin and light occur at opposite times. The human phase response curve (PRC) to melatonin appears to be about 12h out of phase with the PRC to light. These striking complementarities, together with light's acute suppressant effect on melatonin production, sugg…	Circadian phase disorders; Dim light melatonin onset; Light phase response curve; Melatonin administration; Melatonin phase response curve	melatonin; article; circadian rhythm; human; light; light exposure; pacemaker; sleep waking cycle		melatonin, 73-31-4			Oregon Health and Science University U.S. Public Health Service: PO1 AG10794, R01 MH40161, KO2 MH00703, KO2 MH01005, M01 RR00334 National Alliance for Research on Schizophrenia and Depression	We wish to thank the nursing staff of the OHSU GCRC and to acknowledge the assistance of Richard Boney, Neil Anderson, and Aaron Clemons. This work was supported by Public Health Service research grants R01 MH40161, KO2 MH00703, KO2 MH01005 (R. L. S.), PO1 AG10794, and M01 RR00334 (OHSU GCRC) and by a grant from the National Alliance for Research on Schizophrenia and Depression.			Lewy, A.J.; Sleep and Mood Disorders Laboratory, L469, Oregon Health Sciences University, Portland, OR 97201-3098, United States			Informa Healthcare					7420528		CHBIE	9493716	English	Chronobiol. Int.	Article	Final		Scopus	2-s2.0-0031911537	1998_Lewy_The	1998_Lewy_The.pdf	https://sci-hub.se/10.3109/07420529808998671	Y
Lewy A.J., Kern H.A., Rosenthal N.E., Wehr T.A.	7004848014;36776899500;7102033351;7004768783;	Bright artificial light treatment of a manic-depressive patient with a seasonal mood cycle	1982	American Journal of Psychiatry	139	11		1496	1498		256	10.1176/ajp.139.11.1496	https://www.scopus.com/inward/record.uri?eid=2-s2.0-0019982678&doi=10.1176%2fajp.139.11.1496&partnerID=40&md5=e88035a3c75c849bf075ae132e885948	Clin. Psychobiol. Branch, Natl. Inst. Ment. Health, Bethesda, MD, United States	Lewy, A.J., Clin. Psychobiol. Branch, Natl. Inst. Ment. Health, Bethesda, MD, United States; Kern, H.A., Clin. Psychobiol. Branch, Natl. Inst. Ment. Health, Bethesda, MD, United States; Rosenthal, N.E., Clin. Psychobiol. Branch, Natl. Inst. Ment. Health, Bethesda, MD, United States; Wehr, T.A., Clin. Psychobiol. Branch, Natl. Inst. Ment. Health, Bethesda, MD, United States	The authors have recently shown that sunlight and bright artificial light can suppress human melatonin secretion. They now report on a patient with a seasonal mood cycle whose winter depression remitted when his hours of daylight were lengthened with bright artificial light.		melatonin; adult; case report; central nervous system; manic depressive psychosis; sunlight; therapy		melatonin, 73-31-4															0002953X		AJPSA	7137404	English	AM. J. PSYCHIATRY	Article	Final		Scopus	2-s2.0-0019982678	1982_Lewy_Bright	1982_Lewy_Bright.pdf	https://sci-hub.se/10.1176/ajp.139.11.1496	Y
Pierce M.E., Besharse J.C.	7102752937;7004828252;	Circadian regulation of retinomotor movements: I. Interaction of melatonin and, dopamine in the control of cone length	1985	Journal of General Physiology	86	5		671	689		247	10.1085/jgp.86.5.671	https://www.scopus.com/inward/record.uri?eid=2-s2.0-0022360406&doi=10.1085%2fjgp.86.5.671&partnerID=40&md5=b0ea5614445ecb7360e4bc875074312c	Department of Anatomy and Cell Biology, Emory University School of Medicine, Atlanta, GA, 30322, United States	Pierce, M.E., Department of Anatomy and Cell Biology, Emory University School of Medicine, Atlanta, GA, 30322, United States; Besharse, J.C., Department of Anatomy and Cell Biology, Emory University School of Medicine, Atlanta, GA, 30322, United States	In lower vertebrates, cone retinomotor movements occur in response to changes in lighting conditions and to an endogenous circadian clock. In the light, cone myoids contract, while in the dark, they elongate. In order to test the hypothesis that melatonin and dopamine may be involved in the regulation of cone movement, we have used an in vitro eyecup preparation from Xenopus laevis that sustains …		2,3,4,5 tetrahydro 7,8 dihydroxy 1 phenyl 1h 3 benzazepine; apomorphine; clonidine; dopamine; dopamine 2 receptor; melatonin; quinpirole; spiperone; animal cell; circadian rhythm; drug efficacy; frog; nonhuman; photoreceptor; priority journal; retina cone; visual system; xenopus laevis; Animal; Cell Movement; Circadian Rhythm; Dark Adaptation; Dopamine; Drug Interactions; In Vitro; Melatonin; Pho…		2,3,4,5 tetrahydro 7,8 dihydroxy 1 phenyl 1h 3 benzazepine, 67287-49-4; apomorphine, 314-19-2, 58-00-4; clonidine, 4205-90-7, 4205-91-8, 57066-25-8; dopamine, 51-61-6, 62-31-7; melatonin, 73-31-4; quinpirole, 73625-62-4, 80373-22-4, 85760-75-4, 85798-08-9; spiperone, 749-02-0; Dopamine, 51-61-6; Melatonin, 73-31-4	ly 171555; skf 38393	boehringer ingelheim, United States; janssen, United States; lilly, United States; merck sharp and dohme, United States; sigma, United States; sk & f, United States					Pierce, M.E.; Dept. of Anatomy, Emory University School of Medicine, Atlanta, GA, 30322, United States								221295			2999294	English	J. Gen. Physiol.	Article	Final	Open Access	Scopus	2-s2.0-0022360406	1985_Pierce_Circadian	1985_Pierce_Circadian.pdf	https://sci-hub.se/10.1085/jgp.86.5.671	Y
Cajochen C., Frey S., Anders D., Späti J., Bues M., Pross A., Mager R., Wirz-Justice A., Stefani O.	7003530216;26655559500;37030467300;15063541500;55030575500;35722811700;7004466702;7005425500;10139307000;	Evening exposure to a light-emitting diodes (LED)-backlit computer screen affects circadian physiology and cognitive performance	2011	Journal of Applied Physiology	110	5		1432	1438		232	10.1152/japplphysiol.00165.2011	https://www.scopus.com/inward/record.uri?eid=2-s2.0-79956083352&doi=10.1152%2fjapplphysiol.00165.2011&partnerID=40&md5=a42e3ac1a44bd4005d10ea833ff20403	Centre for Chronobiology, Psychiatric Hospital, University of Basel, Wilhelm Kleinstr. 27, CH-4012 Basel, Switzerland; Centre for Applied Technologies in Neuroscience, Psychiatric Hospitals, University of Basel, Basel, Switzerland; Competence Team Visual Technologies, Fraunhofer IAO, University Stuttgart IAT, Stuttgart, Germany	Cajochen, C., Centre for Chronobiology, Psychiatric Hospital, University of Basel, Wilhelm Kleinstr. 27, CH-4012 Basel, Switzerland; Frey, S., Centre for Chronobiology, Psychiatric Hospital, University of Basel, Wilhelm Kleinstr. 27, CH-4012 Basel, Switzerland; Anders, D., Centre for Chronobiology, Psychiatric Hospital, University of Basel, Wilhelm Kleinstr. 27, CH-4012 Basel, Switzerland; Späti,…	Many people spend an increasing amount of time in front of computer screens equipped with light-emitting diodes (LED) with a short wavelength (blue range). Thus we investigated the repercussions on melatonin (a marker of the circadian clock), alertness, and cognitive performance levels in 13 young male volunteers under controlled laboratory conditions in a balanced crossover design. A 5-h evening…	Alertness; Melatonin; Nonvisual effects of light; Shift work; Spectral analysis	adult; article; circadian rhythm; cognition; computer terminal; human; illumination; light; male; methodology; photostimulation; physiology; radiation dose; radiation exposure; semiconductor; task performance; Adult; Circadian Rhythm; Cognition; Computer Terminals; Humans; Light; Lighting; Male; Photic Stimulation; Radiation Dosage; Semiconductors; Task Performance and Analysis; Young Adult									Cajochen, C.; Centre for Chronobiology, Psychiatric Hospital, University of Basel, Wilhelm Kleinstr. 27, CH-4012 Basel, Switzerland; email: christian.cajochen@upkbs.ch								87507587		JAPHE	21415172	English	J. Appl. Physiol.	Article	Final		Scopus	2-s2.0-79956083352	2011_Cajochen_Evening	2011_Cajochen_Evening.pdf	https://sci-hub.se/10.1152/japplphysiol.00165.2011	Y
Hébert M., Martin S.K., Lee C., Eastman C.I.	7102121577;7404840604;7410151891;7102375338;	The effects of prior light history on the suppression of melatonin by light in humans	2002	Journal of Pineal Research	33	4		198	203		227	10.1034/j.1600-079X.2002.01885.x	https://www.scopus.com/inward/record.uri?eid=2-s2.0-0036830429&doi=10.1034%2fj.1600-079X.2002.01885.x&partnerID=40&md5=31a2effd350b76ca92517acb014e949e	Biological Rhythms Research Laboratory, Rush-Presbyterian-St. Luke's Medical Center, Chicago, IL, United States; Laval University Medical Research Center, Department of Ophthalmology, Laval University, Sainte-Foy, Que., Canada; Conservation and Research Department, Roger Williams Park Zoo, Providence, RI, United States; Rush-Presbyterian-St. Luke's Medical Center, Biological Rhythms Research Lab.…	Hébert, M., Biological Rhythms Research Laboratory, Rush-Presbyterian-St. Luke's Medical Center, Chicago, IL, United States, Laval University Medical Research Center, Department of Ophthalmology, Laval University, Sainte-Foy, Que., Canada; Martin, S.K., Biological Rhythms Research Laboratory, Rush-Presbyterian-St. Luke's Medical Center, Chicago, IL, United States, Conservation and Research Depart…	We investigated the impact of light exposure history on light sensitivity in humans, as assessed by the magnitude of the suppression of melatonin secretion by nocturnal light. The hypothesis was that following a week of increased daytime bright-light exposure, subjects would become less sensitive to light, and that after a week of restriction to dimmer light they would become more sensitive. Duri…	Circadian rhythms; Human; Light; Light sensitivity; Melatonin; Melatonin suppression	melatonin; adult; article; circadian rhythm; controlled study; female; hormone release; human; human experiment; light; light exposure; male; night; normal human; photosensitivity; saliva analysis; Adult; Female; Humans; Light; Male; Melatonin		Melatonin, 73-31-4							Eastman, C.I.; Rush-Presbyt.-St. Luke's Med. Center, Biological Rhythms Research Lab, 1645 W. Jackson Blvd., Chicago, IL 60612, United States; email: ceastman@rush.edu								7423098		JPRSE	12390501	English	J. Pineal Res.	Article	Final		Scopus	2-s2.0-0036830429	2002_Hébert_The	2002_Hébert_The.pdf	https://sci-hub.se/10.1034/j.1600-079X.2002.01885.x	Y
Pauley S.M.	6603323767;	Lighting for the human circadian clock: Recent research indicates that lighting has become a public health issue	2004	Medical Hypotheses	63	4		588	596		216	10.1016/j.mehy.2004.03.020	https://www.scopus.com/inward/record.uri?eid=2-s2.0-8444253636&doi=10.1016%2fj.mehy.2004.03.020&partnerID=40&md5=c5f8cd2bff739d0d2558186f0af73b4c	P.O. Box 3759, Ketchum, ID, United States	Pauley, S.M., P.O. Box 3759, Ketchum, ID, United States	The hypothesis that the suppression of melatonin (MLT) by exposure to light at night (LAN) may be one reason for the higher rates of breast and colorectal cancers in the developed world deserves more attention. The literature supports raising this subject for awareness as a growing public health issue. Evidence now exists that indirectly links exposures to LAN to human breast and colorectal cance…		melatonin; blue light; breast cancer; cancer growth; circadian rhythm; colorectal cancer; evolution; health hazard; human; illumination; light; lipid diet; medical research; nonhuman; nursing home; priority journal; retina ganglion cell; review; shift worker; tumor growth; Animalia; Mink cell focus-forming virus; Rattus norvegicus; Vertebrata		melatonin, 73-31-4							Pauley, S.M.; P.O. Box 3759, Ketchum, ID, United States; email: spauley@cox-internet.com			Churchill Livingstone					3069877		MEHYD	15325001	English	Med. Hypotheses	Article	Final		Scopus	2-s2.0-8444253636	2004_Pauley_Lighting	2004_Pauley_Lighting.pdf	https://sci-hub.se/10.1016/j.mehy.2004.03.020	Y
Falchi F., Cinzano P., Elvidge C.D., Keith D.M., Haim A.	6602900938;6602664021;7004441399;57197064052;35555504100;	Limiting the impact of light pollution on human health, environment and stellar visibility	2011	Journal of Environmental Management	92	10		2714	2722		209	10.1016/j.jenvman.2011.06.029	https://www.scopus.com/inward/record.uri?eid=2-s2.0-79960841378&doi=10.1016%2fj.jenvman.2011.06.029&partnerID=40&md5=b560016b078a6057e3fb84fdf1ccbfb0	Istituto di Scienza e Tecnologia dell'Inquinamento Luminoso, Via Roma 13, I-36106 Thiene, Italy; NOAA National Geophysical Data Center, Boulder, CO, United States; Marshall Design Inc., Boulder, CO, United States; The Israeli Center for Interdisciplinary Studies in Chronobiology, University of Haifa, Haifa 31905, Israel	Falchi, F., Istituto di Scienza e Tecnologia dell'Inquinamento Luminoso, Via Roma 13, I-36106 Thiene, Italy; Cinzano, P., Istituto di Scienza e Tecnologia dell'Inquinamento Luminoso, Via Roma 13, I-36106 Thiene, Italy; Elvidge, C.D., NOAA National Geophysical Data Center, Boulder, CO, United States; Keith, D.M., Marshall Design Inc., Boulder, CO, United States; Haim, A., The Israeli Center for In…	Light pollution is one of the most rapidly increasing types of environmental degradation. Its levels have been growing exponentially over the natural nocturnal lighting levels provided by starlight and moonlight. To limit this pollution several effective practices have been defined: the use of shielding on lighting fixture to prevent direct upward light, particularly at low angles above the horiz…	Health and light at night; Light pollution; Light technology; Sustainable lighting	atmospheric pollution; environmental degradation; environmental impact; light intensity; light pollution; light scattering; lightning; public health; article; environmental impact; human; illumination; light emitting diode; light pollution; night; nonhuman; photoreceptor; pollution; vision; Animals; Animals, Wild; Conservation of Natural Resources; Environment; Environmental Pollution; Eye; Healt…		Melatonin, 73-31-4; Sodium, 7440-23-5							Falchi, F.; Istituto di Scienza e Tecnologia dell'Inquinamento Luminoso, Via Roma 13, I-36106 Thiene, Italy; email: falchi@lightpollution.it								3014797		JEVMA	21745709	English	J. Environ. Manage.	Article	Final		Scopus	2-s2.0-79960841378	2011_Falchi_Limiting	2011_Falchi_Limiting.pdf	https://sci-hub.se/10.1016/j.jenvman.2011.06.029	Y
Skinner D.C., Malpaux B.	7201628039;7005437574;	High melatonin concentrations in third ventricular cerebrospinal fluid are not due to Galen vein blood recirculating through the choroid plexus	1999	Endocrinology	140	10		4399	4405		205	10.1210/endo.140.10.7074	https://www.scopus.com/inward/record.uri?eid=2-s2.0-0033305177&doi=10.1210%2fendo.140.10.7074&partnerID=40&md5=cd8148eda1c80bf4efce7edb20b374e6	Dept. of Clinical Veterinary Science, University of Bristol, Langford BS40 5DU, United Kingdom	Skinner, D.C., Dept. of Clinical Veterinary Science, University of Bristol, Langford BS40 5DU, United Kingdom; Malpaux, B., Dept. of Clinical Veterinary Science, University of Bristol, Langford BS40 5DU, United Kingdom	Melatonin has been implicated in several neurotropic effects, but few studies have investigated the bioavailability of melatonin in the brain. The discovery of periventricular sites of action adjacent to the third ventricle forced us to investigate the dynamics of cerebrospinal fluid (CSF) melatonin release and the source of this melatonin. Our first study demonstrated unequivocally that third ve…		melatonin; animal experiment; article; brain circulation; brain third ventricle; brain vein; cerebrospinal fluid; choroid plexus; hormone blood level; hormone release; nonhuman; priority journal		melatonin, 73-31-4							Skinner, D.C.; Dept. of Clinical Veterinary Science, University of Bristol, Langford BS40 5DU, United Kingdom			Endocrine Society					137227		ENDOA	10499491	English	Endocrinology	Article	Final	Open Access	Scopus	2-s2.0-0033305177	1999_Skinner_High	1999_Skinner_High.pdf	https://sci-hub.se/10.1210/endo.140.10.7074	Y
Phipps-Nelson J., Redman J.R., Dijk D.-J., Rajaratnam S.M.W.	8079119000;7102621664;7007018167;35615988800;	Daytime exposure to bright light, as compared to dim light, decreases sleepiness and improves psychomotor vigilance performance	2003	Sleep	26	6		695	700		204	10.1093/sleep/26.6.695	https://www.scopus.com/inward/record.uri?eid=2-s2.0-1442323338&doi=10.1093%2fsleep%2f26.6.695&partnerID=40&md5=731a7ff4dc7836d0bff752ce0f959190	Sch. Psychol., Psychiat. Psychol. M., Monash University, Australia; Surrey Sleep Research Centre, Sch. of Biomed. and Molec. Sciences, University of Surrey, Guildford, United Kingdom; Sch. Psychol., Psychiat. Psychol. M., Monash University, Building 17, Monash, Vic. 3800, Australia	Phipps-Nelson, J., Sch. Psychol., Psychiat. Psychol. M., Monash University, Australia, Sch. Psychol., Psychiat. Psychol. M., Monash University, Building 17, Monash, Vic. 3800, Australia; Redman, J.R., Sch. Psychol., Psychiat. Psychol. M., Monash University, Australia; Dijk, D.-J., Surrey Sleep Research Centre, Sch. of Biomed. and Molec. Sciences, University of Surrey, Guildford, United Kingdom; R…	Study Objectives: This study examined the effects of bright light exposure, as compared to dim light, on daytime subjective sleepiness, incidences of slow eye movements (SEMs), and psychomotor vigilance task (PVT) performance following 2 nights of sleep restriction. Design: The study had a mixed factorial design with 2 independent variables: light condition (bright light, 1,000 lux; dim light, < …	Bright light; Electrooculogram; Melatonin; Psychomotor vigilance performance; Sleep loss; Sleepiness; Slow eye movements	melatonin; melatonin; adult; article; controlled study; electrooculogram; eye movement; female; human; human experiment; light exposure; male; normal human; priority journal; psychomotor activity; research; somnolence; task performance; adolescent; arousal; chemistry; circadian rhythm; clinical trial; comparative study; controlled clinical trial; electroencephalography; electrooculography; factor…		melatonin, 73-31-4; Melatonin, 73-31-4							Phipps-Nelson, J.; Sch. Psychol., Psychiat. Psychol. M., Monash University, Building 17, Monash, Vic. 3800, Australia; email: Billie-Jo.Phipps-Nelson@med.monash.edu.au			American Academy of Sleep Medicine					1618105		SLEED	14572122	English	Sleep	Article	Final	Open Access	Scopus	2-s2.0-1442323338	2003_Phipps-Nelson_Daytime	2003_Phipps-Nelson_Daytime.pdf	https://sci-hub.se/10.1093/sleep/26.6.695	Y
Zaidi F.H., Hull J.T., Peirson StuartN., Wulff K., Aeschbach D., Gooley J.J., Brainard GeorgeC., Gregory-Evans K., Rizzo III JosephF., Czeisler C.A., Foster RussellG., Moseley M.J., Lockley S.W.	36842820800;7202421269;6506845266;7005365870;6603015162;6506691564;7003540124;6701536590;7103216592;7006224092;7402462300;7102055478;56751118900;	Short-Wavelength Light Sensitivity of Circadian, Pupillary, and Visual Awareness in Humans Lacking an Outer Retina	2007	Current Biology	17	24		2122	2128		194	10.1016/j.cub.2007.11.034	https://www.scopus.com/inward/record.uri?eid=2-s2.0-37449016355&doi=10.1016%2fj.cub.2007.11.034&partnerID=40&md5=c12521a7b8dd0d6607f49bf5f66969eb	Division of Neuroscience and Mental Health, Faculty of Medicine, Imperial College London, London, W6 8RF, United Kingdom; Division of Sleep Medicine, Brigham and Women's Hospital, Boston, MA 02115, United States; Nuffield Laboratory of Ophthalmology, University of Oxford, Wellcome Trust Centre for Human Genetics, Roosevelt Drive, Oxford, OX3 7BN, United Kingdom; Division of Sleep Medicine, Harvar…	Zaidi, F.H., Division of Neuroscience and Mental Health, Faculty of Medicine, Imperial College London, London, W6 8RF, United Kingdom; Hull, J.T., Division of Sleep Medicine, Brigham and Women's Hospital, Boston, MA 02115, United States; Peirson, StuartN., Nuffield Laboratory of Ophthalmology, University of Oxford, Wellcome Trust Centre for Human Genetics, Roosevelt Drive, Oxford, OX3 7BN, United…	As the ear has dual functions for audition and balance, the eye has a dual role in detecting light for a wide range of behavioral and physiological functions separate from sight [1-11]. These responses are driven primarily by stimulation of photosensitive retinal ganglion cells (pRGCs) that are most sensitive to short-wavelength (∼480 nm) blue light and remain functional in the absence of rods an…	HUMDISEASE	aged; article; awareness; blindness; case report; circadian rhythm; congenital malformation; female; human; light; male; middle aged; pathophysiology; physiology; pupil reflex; retina; retina ganglion cell; Aged, 80 and over; Awareness; Blindness; Circadian Rhythm; Female; Humans; Light; Male; Middle Aged; Reflex, Pupillary; Retina; Retinal Ganglion Cells					R01 AT002129 National Institutes of Health National Space Biomedical Research Institute Wellcome Trust: 069714 National Aeronautics and Space Administration: NCC9-58 R01 NS36590 National Center for Research Resources: M01 RR02635 National Institute of Neurological Disorders and Stroke: R01 NS040982	This paper is dedicated to the memory of the female subject, who completed these studies with good humor and unfailing enthusiasm. We would like to thank the technical, dietary, and clinical staff of the Division of Sleep Medicine and the General Clinical Research Centre at Brigham and Women's Hospital. This work was supported by the Wellcome Trust, UK (grant 069714 to R.G.F.) and the National In…			Foster, RussellG.; Nuffield Laboratory of Ophthalmology, University of Oxford, Wellcome Trust Centre for Human Genetics, Roosevelt Drive, Oxford, OX3 7BN, United Kingdom; email: russell.foster@eye.ox.ac.uk								9609822		CUBLE	18082405	English	Curr. Biol.	Article	Final	Open Access	Scopus	2-s2.0-37449016355	2007_Zaidi_	2007_Zaidi_.pdf	https://sci-hub.se/10.1016/j.cub.2007.11.034	Y
Chellappa S.L., Steiner R., Blattner P., Oelhafen P., Götz T., Cajochen C.	35112750100;57197492489;7003896534;57204296589;55004259200;7003530216;	Non-visual effects of light on melatonin, alertness and cognitive performance: Can blue-enriched light keep us alert?	2011	PLoS ONE	6	1	e16429				189	10.1371/journal.pone.0016429	https://www.scopus.com/inward/record.uri?eid=2-s2.0-79551517811&doi=10.1371%2fjournal.pone.0016429&partnerID=40&md5=202cb2d5a4dae90ed510ceab24e92f88	Centre for Chronobiology, Psychiatric Hospital of the University of Basel, Basel, Switzerland; The CAPES Foundation/Ministry of Education of Brazil, Brasilia, Brazil; Department of Physics, University of Basel, Basel, Switzerland; Federal Office of Metrology (METAS), Bern-Wabern, Switzerland	Chellappa, S.L., Centre for Chronobiology, Psychiatric Hospital of the University of Basel, Basel, Switzerland, The CAPES Foundation/Ministry of Education of Brazil, Brasilia, Brazil; Steiner, R., Department of Physics, University of Basel, Basel, Switzerland; Blattner, P., Federal Office of Metrology (METAS), Bern-Wabern, Switzerland; Oelhafen, P., Department of Physics, University of Basel, Bas…	Background: Light exposure can cascade numerous effects on the human circadian process via the non-imaging forming system, whose spectral relevance is highest in the short-wavelength range. Here we investigated if commercially available compact fluorescent lamps with different colour temperatures can impact on alertness and cognitive performance. Methods: Sixteen healthy young men were studied in…		melatonin; adult; alertness; article; brain function; cognition; enzyme repression; executive function; functional magnetic resonance imaging; human; human experiment; light; light exposure; light intensity; male; normal human; psychomotor performance; saliva analysis; salivation; sleep time; temperature; visual stimulation; wellbeing; workplace; circadian rhythm; clinical trial; color; controlle…		melatonin, 73-31-4; Melatonin, 73-31-4							Cajochen, C.; Centre for Chronobiology, Psychiatric Hospital of the University of Basel, Basel, Switzerland; email: Christian.Cajochen@upkbs.ch								19326203			21298068	English	PLoS ONE	Article	Final	Open Access	Scopus	2-s2.0-79551517811	2011_Chellappa_Non-visual	2011_Chellappa_Non-visual.pdf	https://sci-hub.se/10.1371/journal.pone.0016429	Y
Bojkowski C.J., Aldhous M.E., English J., Franey C., Poulton A.L., Skene D.J., Arendt J.	6602339871;6701707005;7202807110;6603360737;6701523863;21035951300;7101704924;	Suppression of nocturnal plasma melatonin and 6-sulphatoxymelatonin by bright and dim light in man	1987	Hormone and Metabolic Research	19	9		437	440		184	10.1055/s-2007-1011846	https://www.scopus.com/inward/record.uri?eid=2-s2.0-0023193078&doi=10.1055%2fs-2007-1011846&partnerID=40&md5=b27de64ae3fcee6f26af6e08bd0b938e	Department of Biochemistry, University of Surrey, Guildford, Surrey GU2 5XH, United Kingdom	Bojkowski, C.J., Department of Biochemistry, University of Surrey, Guildford, Surrey GU2 5XH, United Kingdom; Aldhous, M.E., Department of Biochemistry, University of Surrey, Guildford, Surrey GU2 5XH, United Kingdom; English, J., Department of Biochemistry, University of Surrey, Guildford, Surrey GU2 5XH, United Kingdom; Franey, C.; Poulton, A.L.; Skene, D.J.; Arendt, J.	Previous studies have shown that bright light (2500 lux) suppresses nocturnal secretion of melatonin, while dim light (500 lux) has little or no effect. We have studied the effect of varying intensities of light on 5 normal male volunteers (age 18-28). The experiment was divided into 3 parts which took place at weekly intervals. Subjects remained under artificial light (fluorescent strip 150-250 …		6 hydroxymelatonin o sulfate; melatonin; central nervous system; circadian rhythm; clinical article; endocrine system; human; human experiment; light exposure; normal human; visual system		6 hydroxymelatonin o sulfate, 2208-40-4; melatonin, 73-31-4										Georg Thieme Verlag					185043		HMMRA		English	HORM. METAB. RES.	Article	Final		Scopus	2-s2.0-0023193078	1987_Bojkowski_Suppression	1987_Bojkowski_Suppression.pdf	https://sci-hub.se/10.1055/s-2007-1011846	Y
Bittman E.L., Karsch F.J.	7004662497;7101883690;	Nightly duration of pineal melatonin secretion determines the reproductive response to inhibitory day length in the ewe.	1984	Biology of reproduction	30	3		585	593		179	10.1095/biolreprod30.3.585	https://www.scopus.com/inward/record.uri?eid=2-s2.0-0021414921&doi=10.1095%2fbiolreprod30.3.585&partnerID=40&md5=ad99bc707367a557cbb4822994a5e629		Bittman, E.L.; Karsch, F.J.	The pineal controls the reproductive response of ewes to both stimulatory (short) and inhibitory (long) day lengths. Melatonin, a pineal hormone whose nocturnal secretion is entrained by photoperiod, mediates the effect of stimulatory photoperiod. We now report that melatonin also mediates the effect of inhibitory day length, monitored as response to estradiol negative feedback on luteinizing hor…		luteinizing hormone; melatonin; animal; article; blood; circadian rhythm; female; light; physiology; pineal body; sexual behavior; sheep; Animals; Circadian Rhythm; Female; Light; Luteinizing Hormone; Melatonin; Pineal Gland; Sexual Behavior, Animal; Sheep		luteinizing hormone, 39341-83-8, 9002-67-9; melatonin, 73-31-4; Luteinizing Hormone, 9002-67-9; Melatonin, 73-31-4							Bittman, E.L.								63363			6722237	English	Biol. Reprod.	Article	Final	Open Access	Scopus	2-s2.0-0021414921	1984_Bittman_Nightly	1984_Bittman_Nightly.pdf	https://sci-hub.se/10.1095/biolreprod30.3.585	Y
Brainard G.C., Lewy A.J., Menaker M., Fredrickson R.H., Miller L.S., Weleber R.G., Cassone V., Hudson D.	7003540124;7004848014;7005336144;24387279800;55239587600;7005148782;56687667700;7202892918;	Dose-response relationship between light irradiance and the suppression of plasma melatonin in human volunteers	1988	Brain Research	454	2019-02-01		212	218		178	10.1016/0006-8993(88)90820-7	https://www.scopus.com/inward/record.uri?eid=2-s2.0-0023944789&doi=10.1016%2f0006-8993%2888%2990820-7&partnerID=40&md5=fe174609faf82e0c26662f0a47c3cba5	Department of Psychiatry and Ophthalmology, Oregon Health Sciences University, Portland, OR 97201, United States; Institute of Neuroscience, University of Oregon, Eugene, OR 97405, United States; Department of Neurology, Jefferson Medical College, Philadelphia, PA 19107, United States	Brainard, G.C., Department of Neurology, Jefferson Medical College, Philadelphia, PA 19107, United States; Lewy, A.J., Department of Psychiatry and Ophthalmology, Oregon Health Sciences University, Portland, OR 97201, United States; Menaker, M., Institute of Neuroscience, University of Oregon, Eugene, OR 97405, United States; Fredrickson, R.H., Institute of Neuroscience, University of Oregon, Eug…	This study tested the capacity of different irradiances of monochromatic light to reduce plasma melatonin in normal humans. Six healthy male volunteers, 24-34 years old, were exposed to 0.01, 0.3, 1.6,5, or 13 μW/cm2 of 509 nm monochromatic light for 1 h during the night on separate occasions. Light irradiance depressed plasma melatonin in a dose-response pattern. The data indicate that the mean …	Circadian; Light; Melatonin; Pineal; Wavelength	melatonin; adult; human; human cell; human experiment; light intensity; male; normal human; pineal body; wavelength; Adult; Human; Lighting; Male; Melatonin; Pineal Gland; Support, Non-U.S. Gov't; Support, U.S. Gov't, P.H.S.		melatonin, 73-31-4; Melatonin, 73-31-4							Brainard, G.C.; Department of Neurology, Jefferson Medical College, Philadelphia, PA 19107, United States								68993		BRREA	3409004	English	Brain Res.	Article	Final		Scopus	2-s2.0-0023944789	1988_Brainard_Dose-response	1988_Brainard_Dose-response.pdf	https://sci-hub.se/10.1016/0006-8993(88)90820-7	Y
Gooley J.J., Rajaratnam S.M.W., Brainard G.C., Kronauer R.E., Czeisler C.A., Lockley S.W.	6506691564;35615988800;7003540124;57196395263;7006224092;56751118900;	Spectral responses of the human circadian system depend on the irradiance and duration of exposure to light	2010	Science Translational Medicine	2	31					178	10.1126/scitranslmed.3000741	https://www.scopus.com/inward/record.uri?eid=2-s2.0-77953009762&doi=10.1126%2fscitranslmed.3000741&partnerID=40&md5=61c2e2c488611fb7bc6477bcc87e5186	Department of Medicine, Division of Sleep Medicine, Brigham and Women's Hospital, Boston, MA 02115, United States; Division of Sleep Medicine, Harvard Medical School, Boston, MA 02115, United States; Duke-NUS Graduate Medical School, Singapore 169857, Singapore; School of Psychology and Psychiatry, Monash University, Clayton 3800, VIC, Australia; Department of Neurology, Jefferson Medical College…	Gooley, J.J., Department of Medicine, Division of Sleep Medicine, Brigham and Women's Hospital, Boston, MA 02115, United States, Division of Sleep Medicine, Harvard Medical School, Boston, MA 02115, United States, Duke-NUS Graduate Medical School, Singapore 169857, Singapore; Rajaratnam, S.M.W., Department of Medicine, Division of Sleep Medicine, Brigham and Women's Hospital, Boston, MA 02115, Un…	In humans, modulation of circadian rhythms by light is thought to be mediated primarily by melanopsin-containing retinal ganglion cells, not rods or cones. Melanopsin cells are intrinsically blue light-sensitive but also receive input from visual photoreceptors. We therefore tested in humans whether cone photoreceptors contribute to the regulation of circadian and neuroendocrine light responses. …		melanopsin; melatonin; adult; article; circadian rhythm; controlled study; evoked visual response; hormone inhibition; hormone release; human; human experiment; light exposure; normal human; photoreceptor; priority journal; radiation exposure; spectral sensitivity; visual stimulation; Adolescent; Adult; Circadian Rhythm; Dose-Response Relationship, Radiation; Humans; Light; Melatonin; Photoperiod…		melanopsin, 403476-86-8; melatonin, 73-31-4; Melatonin, 73-31-4; Rod Opsins; melanopsin							Lockley, S. W.; Department of Medicine, Division of Sleep Medicine, Brigham and Women's Hospital, Boston, MA 02115, United States; email: slockley@hms.harvard.edu								19466234			20463367	English	Sci. Transl. Med.	Article	Final		Scopus	2-s2.0-77953009762	2010_Gooley_Spectral	2010_Gooley_Spectral.pdf	https://sci-hub.se/10.1126/scitranslmed.3000741	Y
Wang P., Sun X., Li C., Wei Z., Liang D., Ma F.	9633926000;55884975800;56384673700;55184797600;27171959200;24179180500;	Long-term exogenous application of melatonin delays drought-induced leaf senescence in apple	2013	Journal of Pineal Research	54	3		292	302		176	10.1111/jpi.12017	https://www.scopus.com/inward/record.uri?eid=2-s2.0-84874949201&doi=10.1111%2fjpi.12017&partnerID=40&md5=876119179573a5a8c9ea6a50c77f31f2	Department of Pomology, College of Horticulture, Northwest A and F University, Yangling, Shaanxi 712100, China	Wang, P., Department of Pomology, College of Horticulture, Northwest A and F University, Yangling, Shaanxi 712100, China; Sun, X., Department of Pomology, College of Horticulture, Northwest A and F University, Yangling, Shaanxi 712100, China; Li, C., Department of Pomology, College of Horticulture, Northwest A and F University, Yangling, Shaanxi 712100, China; Wei, Z., Department of Pomology, Col…	To examine the potential roles of melatonin in drought tolerance, we tested the effects of its long-term exogenous application on 'Hanfu' apple (Malus domestica Borkh.). When 100 μm melatonin was added to soils under drought conditions, the resultant oxidative stress was eased and leaf senescence was delayed. This molecule significantly reduced chlorophyll degradation and suppressed the up-regula…	apple; ascorbate-glutathione cycle; chlorophyll fluorescence; drought; leaf senescence; melatonin; photosynthesis	chlorophyll; hydrogen peroxide; melatonin; apple; article; chlorophyll fluorescence; drought; drought stress; drought tolerance; leaf gas exchange; leaf senescence; nonhuman; oxidative stress; photochemistry; photosynthesis; photosystem II; upregulation; Aging; Analysis of Variance; Antioxidants; Chlorophyll; Droughts; Malus; Melatonin; Oxygenases; Plant Leaves; Plant Proteins; Stress, Physiologi…		chlorophyll, 1406-65-1, 15611-43-5; hydrogen peroxide, 7722-84-1; melatonin, 73-31-4; Antioxidants; Chlorophyll, 1406-65-1; Melatonin, JL5DK93RCL; Oxygenases, 1.13.-; Plant Proteins; pheide a oxygenase, 1.13.-							Ma, F.; Department of Pomology, College of Horticulture, Northwest A and F University, Yangling, Shaanxi 712100, China; email: fwm64@sina.com								7423098		JPRSE	23106234	English	J. Pineal Res.	Article	Final		Scopus	2-s2.0-84874949201	2013_Wang_Long-term	2013_Wang_Long-term.pdf	https://sci-hub.se/10.1111/jpi.12017	Y
Gooley J.J., Chamberlain K., Smith K.A., Khalsa S.B.S., Rajaratnam S.M.W., Van Reen E., Zeitzer J.M., Czeisler C.A., Lockley S.W.	6506691564;41860941600;56302259000;7004760420;35615988800;8513612800;6602853952;7006224092;56751118900;	Exposure to room light before bedtime suppresses melatonin onset and shortens melatonin duration in humans	2011	Journal of Clinical Endocrinology and Metabolism	96	3		E463	E472		173	10.1210/jc.2010-2098	https://www.scopus.com/inward/record.uri?eid=2-s2.0-79952289333&doi=10.1210%2fjc.2010-2098&partnerID=40&md5=b00a596a13b38d3c8aa181f9caa9085a	Division of Sleep Medicine, Brigham and Women's Hospital, Harvard Medical School, 221 Longwood Avenue, Boston, MA 02115, United States; Faculty of Health and Medical Sciences, University of Surrey, Guildford, Surrey GU2 7XH, United Kingdom	Gooley, J.J., Division of Sleep Medicine, Brigham and Women's Hospital, Harvard Medical School, 221 Longwood Avenue, Boston, MA 02115, United States; Chamberlain, K., Faculty of Health and Medical Sciences, University of Surrey, Guildford, Surrey GU2 7XH, United Kingdom; Smith, K.A., Division of Sleep Medicine, Brigham and Women's Hospital, Harvard Medical School, 221 Longwood Avenue, Boston, MA …	Context: Millions of individuals habitually expose themselves to room light in the hours before bedtime, yet the effects of this behavior on melatonin signaling are not well recognized. Objective: We tested the hypothesis that exposure to room light in the late evening suppresses the onset of melatonin synthesis and shortens the duration of melatonin production. Design: In a retrospective analysi…		melatonin; adult; article; controlled study; hormone blood level; hormone release; hormone response; hormone synthesis; human; human experiment; light; light exposure; priority journal; room light; sleep time; Adolescent; Adult; Female; Humans; Light; Lighting; Male; Melatonin; Sleep; Time Factors; Young Adult		melatonin, 73-31-4; Melatonin, 73-31-4							Gooley, J. J.; Division of Sleep Medicine, Brigham and Women's Hospital, Harvard Medical School, 221 Longwood Avenue, Boston, MA 02115, United States; email: gmsjjg@nus.edu								0021972X		JCEMA	21193540	English	J. Clin. Endocrinol. Metab.	Article	Final	Open Access	Scopus	2-s2.0-79952289333	2011_Gooley_Exposure	2011_Gooley_Exposure.pdf	https://sci-hub.se/10.1210/jc.2010-2098	Y
Blask D.E., Sauer L.A., Dauchy R.T., Holowachuk E.W., Ruhoff M.S., Kopff H.S.	7006151595;7004486514;7004364685;6602980141;6506653439;6504827085;	Melatonin inhibition of cancer growth in vivo involves suppression of tumor fatty acid metabolism via melatonin receptor-mediated signal transduction events	1999	Cancer Research	59	18		4693	4701		171		https://www.scopus.com/inward/record.uri?eid=2-s2.0-0033567891&partnerID=40&md5=e56b9e887b42863f004b2d86e0fa9fe5	Lab. of Exp. Neuroendocrinol./Oncol., Bassett Research Institute, Cooperstown, NY 13326-1394, United States; Bassett Research Institute, One Atwell Road, Cooperstown, NY 13326-1394, United States	Blask, D.E., Lab. of Exp. Neuroendocrinol./Oncol., Bassett Research Institute, Cooperstown, NY 13326-1394, United States, Bassett Research Institute, One Atwell Road, Cooperstown, NY 13326-1394, United States; Sauer, L.A., Lab. of Exp. Neuroendocrinol./Oncol., Bassett Research Institute, Cooperstown, NY 13326-1394, United States; Dauchy, R.T., Lab. of Exp. Neuroendocrinol./Oncol., Bassett Researc…	The growth of rat hepatoma 7288CTC in Vivo is stimulated by the uptake of linoleic acid (LA) and its metabolism to 13-hydroxyoctadecadienoic acid (13-HODE), an important mitogenic signaling molecule within this tumor. Conversely, the growth of a variety of experimental cancers in vivo is inhibited by either physiological or pharmacological levels of the pineal gland hormone melatonin, although th…		8 bromo cyclic AMP; carrier protein; coriolic acid; cyclic AMP; forskolin; hormone antagonist; linoleic acid; melatonin; melatonin receptor; messenger RNA; pertussis toxin; animal experiment; animal model; animal tissue; antineoplastic activity; article; cancer inhibition; controlled study; dose time effect relation; fatty acid transport; hormone blood level; light dark cycle; male; mitosis inhib…		13-hydroxy-9,11-octadecadienoic acid, 5204-88-6; 8-Bromo Cyclic Adenosine Monophosphate, 23583-48-4; Forskolin, 66428-89-5; Linoleic Acid, 2197-37-7; Linoleic Acids; Melatonin, 73-31-4; N-(2-(1-naphthalenyl)ethyl)cyclobutanecarboxamide, 152302-33-5; Naphthalenes; Pertussis Toxin, EC 2.4.2.31; Receptors, Cell Surface; Receptors, Cytoplasmic and Nuclear; Receptors, Melatonin; Virulence Factors, Bor…							Blask, D.E.; Bassett Research Institute, One Atwell Road, Cooperstown, NY 13326-1394, United States; email: dblask@usa.net								85472		CNREA	10493527	English	Cancer Res.	Article	Final		Scopus	2-s2.0-0033567891	1999_Blask_Melatonin	1999_Blask_Melatonin.pdf	https://sci-hub.se/	?
Klerman E.B., Rimmer D.W., Dijk D.-J., Kronauer R.E., Rizzo III J.F., Czeisler C.A.	6701750101;7005223287;7007018167;57196395263;7103216592;7006224092;	Nonphotic entrainment of the human circadian pacemaker	1998	American Journal of Physiology - Regulatory Integrative and Comparative Physiology	274	4 43-4		R991	R996		167	10.1152/ajpregu.1998.274.4.r991	https://www.scopus.com/inward/record.uri?eid=2-s2.0-0031980303&partnerID=40&md5=c5313ff019b0929b6a792867df2565b9	Circadian, Neuroendocrine Sleep D., Endocrinology-Hypertension Division, Harvard Medical School, Boston, MA 02115, United States; Division of Applied Sciences, Harvard University, Cambridge, MA 02138, United States; Department of Ophthalmology, Harvard Medical School, Massachusetts Eye and Ear Infirmary, Boston, MA 02114, United States; Circadian, Neuroendocrine Sleep D., Endocrinology-Hypertensi…	Klerman, E.B., Circadian, Neuroendocrine Sleep D., Endocrinology-Hypertension Division, Harvard Medical School, Boston, MA 02115, United States, Circadian, Neuroendocrine Sleep D., Endocrinology-Hypertension Division, Harvard Medical School, 221 Longwood Ave., Boston, MA 02115, United States; Rimmer, D.W., Circadian, Neuroendocrine Sleep D., Endocrinology-Hypertension Division, Harvard Medical Sc…	In organisms as diverse as single-celled algae and humans, light is the primary stimulus mediating entrainment of the circadian biological clock. Reports that some totally blind individuals appear entrained to the 24-h day have suggested that nonphotic stimuli may also be effective circadian synchronizers in humans, although the nonphotic stimuli are probably comparatively weak synchronizers, bec…	Activity; Blindness; Circadian rhythms; Light	melatonin; adult; aged; article; blindness; circadian rhythm; controlled study; core temperature; female; hormone release; human; human experiment; illumination; light exposure; male; normal human; physical activity; priority journal; NASA Discipline Regulatory Physiology; Non-NASA Center; Adult; Aged; Blindness; Body Temperature; Circadian Rhythm; Female; Humans; Male; Melatonin; Middle Aged; Ph…		Melatonin, 73-31-4							Klerman, E.B.; Neuroendocrine/Sleep Disorders Sec., Brigham and Women's Hospital, Harvard Medical School, 221 Longwood Ave., Boston, MA 02115, United States								3636119		AJPRD	9575961	English	Am. J. Physiol. Regul. Integr. Comp. Physiol.	Article	Final		Scopus	2-s2.0-0031980303	1998_Klerman_Nonphotic	1998_Klerman_Nonphotic.pdf	https://sci-hub.se/10.1152/ajpregu.1998.274.4.r991	Y
Brainard G.C., Richardson B.A., King T.S., Reiter R.J.	7003540124;7202396064;25950264800;7402574751;	The influence of different light spectra on the suppression of pineal melatonin content in the syrian hamster	1984	Brain Research	294	2		333	339		164	10.1016/0006-8993(84)91045-X	https://www.scopus.com/inward/record.uri?eid=2-s2.0-0021331009&doi=10.1016%2f0006-8993%2884%2991045-X&partnerID=40&md5=0b8f4e420e1f335ad8547cebc88e1836	Department of Anatomy, The University of Texas Health Science Center at San Antonio, 7703 Floyd Curl Drive, San Antonio, TX 78284, United States	Brainard, G.C., Department of Anatomy, The University of Texas Health Science Center at San Antonio, 7703 Floyd Curl Drive, San Antonio, TX 78284, United States; Richardson, B.A., Department of Anatomy, The University of Texas Health Science Center at San Antonio, 7703 Floyd Curl Drive, San Antonio, TX 78284, United States; King, T.S., Department of Anatomy, The University of Texas Health Science…	The purpose of this study was to test the capacity of different visible wavelengths of light to suppress nocturnal levels of pineal melatonin in hamsters. It was found that the visible wavelengths vary in their ability to perturb pineal melatonin. During the period of peak pineal melatonin production, animals were exposed to fluorescent light sources having half-peak bandwidths of 339-371 nm (nea…	blue light; green light; light spectra; melatonin; pineal gland	melatonin; visual pigment; animal experiment; central nervous system; endocrine system; nonhuman; pineal body; spectral sensitivity; visual system; Animal; Hamsters; Light; Male; Melatonin; Mesocricetus; Pineal Gland; Support, U.S. Gov't, Non-P.H.S.		melatonin, 73-31-4; Melatonin, 73-31-4							Reiter, R.J.; Department of Anatomy, The University of Texas Health Science Center at San Antonio, 7703 Floyd Curl Drive, San Antonio, TX 78284, United States								68993		BRREA	6704731	English	Brain Res.	Article	Final		Scopus	2-s2.0-0021331009	1984_Brainard_The	1984_Brainard_The.pdf	https://sci-hub.se/10.1016/0006-8993(84)91045-X	Y
Wehr T.A., Jacobsen F.M., Sack D.A., Arendt J., Tamarkin L., Rosenthal N.E.	7004768783;7102473867;24397819900;7101704924;7003640553;7102033351;	Phototherapy of Seasonal Affective Disorder: Time of Day and Suppression of Melatonin Are Not Critical for Antidepressant Effects	1986	Archives of General Psychiatry	43	9		870	875		160	10.1001/archpsyc.1986.01800090060008	https://www.scopus.com/inward/record.uri?eid=2-s2.0-0022537533&doi=10.1001%2farchpsyc.1986.01800090060008&partnerID=40&md5=921b0210cf06894e7f60d7e8d86e15f7	Clinical Psychobiology Branch, National Institute of Mental Health, Bethesda, Md, United States	Wehr, T.A., Clinical Psychobiology Branch, National Institute of Mental Health, Bethesda, Md, United States; Jacobsen, F.M., Clinical Psychobiology Branch, National Institute of Mental Health, Bethesda, Md, United States; Sack, D.A., Clinical Psychobiology Branch, National Institute of Mental Health, Bethesda, Md, United States; Arendt, J., Clinical Psychobiology Branch, National Institute of Men…	Seasonal affective disorder is characterized by recurring cycles of fall-winter depression and spring-summer hypomania (or euthymia). In winter, depressed patients with seasonal affective disorder respond to daily treatments with five to six hours of bright artificial light in two to three days. They relapse two to three days after light is withdrawn. In this study carefully controlled experiment…		melatonin; affective neurosis; central nervous system; depression; human; photoperiodicity; phototherapy; priority journal; psychological aspect; therapy; Circadian Rhythm; Depressive Disorder; Evaluation Studies; Female; Humans; Male; Melatonin; Phototherapy; Psychiatric Status Rating Scales; Seasons		melatonin, 73-31-4; Melatonin, 73-31-4							Wehr, T.A.; National Institute of Mental Health, 10/4S239, 9000 Rockville Pike, Bethesda, MD 20892, United States								0003990X			3753164	English	Arch. Gen. Psychiatry	Article	Final		Scopus	2-s2.0-0022537533	1986_Wehr_Phototherapy	1986_Wehr_Phototherapy.pdf	https://sci-hub.se/10.1001/archpsyc.1986.01800090060008	Y
Olofsson K., Alling C., Lundberg D., Malmros C.	7003404663;57197578161;7005742321;6602877836;	Abolished circadian rhythm of melatonin secretion in sedated and artificially ventilated intensive care patients	2004	Acta Anaesthesiologica Scandinavica	48	6		679	684		159	10.1111/j.0001-5172.2004.00401.x	https://www.scopus.com/inward/record.uri?eid=2-s2.0-3042570072&doi=10.1111%2fj.0001-5172.2004.00401.x&partnerID=40&md5=d41ea92371aaece2347c0f7bf2bab66e	Dept. of Anesth. and Intensive Care, Helsingborg Hospital, 251 87 Helsingborg, Sweden; Department of Medical Neurochemistry, Lund University Hospital, Lund, Sweden; Dept. of Anesth. and Intensive Care, Lund University Hospital, Lund, Sweden	Olofsson, K., Dept. of Anesth. and Intensive Care, Helsingborg Hospital, 251 87 Helsingborg, Sweden, Dept. of Anesth. and Intensive Care, Lund University Hospital, Lund, Sweden; Alling, C., Department of Medical Neurochemistry, Lund University Hospital, Lund, Sweden; Lundberg, D., Dept. of Anesth. and Intensive Care, Lund University Hospital, Lund, Sweden; Malmros, C., Dept. of Anesth. and Intens…	Background: Sleep disturbance is common in intensive care patients. Aside from its unpleasantness, there is a correlation with intensive care unit (ICU) syndrome/delirium. Reasons for sleep deprivation appear to be multifactorial, including the underlying illness, an acute superimposed disturbance, medications, and the ICU environment itself. There are reasons to believe that alterations of the '…	Circadian rhythm; Critical illness; ICU syndrome; Intensive care; Melatonin; Sleep	corticosteroid; dopamine; fentanyl; melatonin; midazolam; noradrenalin; adult; aged; aorta rupture; article; artificial ventilation; bispectral index; circadian rhythm; clinical article; controlled study; critical illness; delirium; female; head injury; hormone blood level; hormone release; hormone urine level; human; hydrothorax; intensive care unit; male; pneumonia; priority journal; Pseudomona…		dopamine, 51-61-6, 62-31-7; fentanyl, 437-38-7; melatonin, 73-31-4; midazolam, 59467-70-8; noradrenalin, 1407-84-7, 51-41-2; Fentanyl, 437-38-7; Hypnotics and Sedatives; Melatonin, 73-31-4; Midazolam, 59467-70-8; Narcotics; Propofol, 2078-54-8							Olofsson, K.; Dept. of Anesth. and Intensive Care, Lund University Hospital, Lund, Sweden; email: karin.olofsson@helsingborgslasarett.se								15172		AANEA	15196098	English	Acta Anaesthesiol. Scand.	Article	Final		Scopus	2-s2.0-3042570072	2004_Olofsson_Abolished	2004_Olofsson_Abolished.pdf	https://sci-hub.se/10.1111/j.0001-5172.2004.00401.x	Y
Nurnberger J.I., Adkins S., Lahiri D.K., Mayeda A., Hu K., Lewy A., Miller A., Bowman E.S., Miller M.J., Rau N.L., Smiley C., Davis-Singh D.	35353542700;57197277527;7004866559;7004310437;14633760100;7004848014;57198654477;7102143038;55740635700;36960333800;7005681667;6504061509;	Melatonin suppression by light in euthymic bipolar and unipolar patients	2000	Archives of General Psychiatry	57	6		572	579		158	10.1001/archpsyc.57.6.572	https://www.scopus.com/inward/record.uri?eid=2-s2.0-0034085391&doi=10.1001%2farchpsyc.57.6.572&partnerID=40&md5=4decd7a6d3a9a90c14e8d158f5c7d1be	Department of Psychiatry, Indiana Univ. School of Medicine, Indianapolis, IN 46202-4887, United States; Department of Psychiatry, Roudebush Vet. Aff. Medical Center, Indianapolis, IN, United States; Institute of Psychiatric Research, Larue Carter Hospital, Indianapolis, IN, United States; Department of Psychiatry, Wishard Hospital, Indianapolis, IN, United States; Department of Psychiatry, Oregon…	Nurnberger, J.I., Department of Psychiatry, Indiana Univ. School of Medicine, Indianapolis, IN 46202-4887, United States, Department of Psychiatry, Indiana Univ. School of Medicine, 791 Union Dr, Indianapolis, IN 46202-4887, United States; Adkins, S., Department of Psychiatry, Indiana Univ. School of Medicine, Indianapolis, IN 46202-4887, United States; Lahiri, D.K., Department of Psychiatry, Ind…	Background: Previous studies have suggested that bipolar patients are supersensitive to light suppression of melatonin and that this may be a trait marker for genetic vulnerability. The present study was an attempt to replicate and extend this observation Propranolol hydrochloride effects were compared with light effects because of the documented influence of β- adrenergic receptors on melatonin …		antidepressant agent; beta adrenergic receptor; carbamazepine; corticotropin; fluoxetine; hydrocortisone; lithium; melatonin; propranolol; adult; article; chromatography; controlled study; depression; drug effect; female; hormone synthesis; human; immunoradiometric assay; light; major clinical study; male; manic depressive psychosis; mass spectrometry; radioimmunoassay		carbamazepine, 298-46-4, 8047-84-5; corticotropin, 11136-52-0, 9002-60-2, 9061-27-2; fluoxetine, 54910-89-3, 56296-78-7, 59333-67-4; hydrocortisone, 50-23-7; lithium, 7439-93-2; melatonin, 73-31-4; propranolol, 13013-17-7, 318-98-9, 3506-09-0, 4199-09-1, 525-66-6							Nurnberger Jr., J.I.; Department of Psychiatry, Indiana University School of Med., 791 Union Dr, Indianapolis, IN 46202-4887, United States; email: jnurnber@iupui.edu			American Medical Association					0003990X		ARGPA	10839335	English	Arch. Gen. Psychiatry	Article	Final		Scopus	2-s2.0-0034085391	2000_Nurnberger_Melatonin	2000_Nurnberger_Melatonin.pdf	https://sci-hub.se/10.1001/archpsyc.57.6.572	?
Sekaran S., Foster R.G., Lucas R.J., Hankins M.W.	6507177503;7402462300;7201704107;11539913900;	Calcium imaging reveals a network of intrinsically light-sensitive inner-retinal neurons	2003	Current Biology	13	15		1290	1298		158	10.1016/S0960-9822(03)00510-4	https://www.scopus.com/inward/record.uri?eid=2-s2.0-0042991430&doi=10.1016%2fS0960-9822%2803%2900510-4&partnerID=40&md5=e99a8331973f987cf886ff733fef111d	Department of Integrative and Molecular Neuroscience, Division of Neuroscience and Psychological Medicine, Imperial College London, Charing Cross Hospital, Fulham Palace Road, London W6 8RF, United Kingdom	Sekaran, S., Department of Integrative and Molecular Neuroscience, Division of Neuroscience and Psychological Medicine, Imperial College London, Charing Cross Hospital, Fulham Palace Road, London W6 8RF, United Kingdom; Foster, R.G., Department of Integrative and Molecular Neuroscience, Division of Neuroscience and Psychological Medicine, Imperial College London, Charing Cross Hospital, Fulham Pa…	Background: Mice lacking rod and cone photoreceptors (rd/rd cl) are still able to regulate a range of responses to light, including circadian photoentrainment, the pupillary light reflex, and suppression of pineal melatonin by light. These data are consistent with the presence of a novel inner-retinal photoreceptor mediating non-image-forming irradiance detection. Results: We have examined the na…		Animalia																	9609822			12906788	English	Curr. Biol.	Article	Final	Open Access	Scopus	2-s2.0-0042991430	2003_Sekaran_Calcium	2003_Sekaran_Calcium.pdf	https://sci-hub.se/10.1016/S0960-9822(03)00510-4	Y
Cahill G.M., Besharse J.C.	7005277631;7004828252;	Resetting the circadian clock in cultured Xenopus eyecups: Regulation of retinal melatonin rhythms by light and D2 dopamine receptors	1991	Journal of Neuroscience	11	10		2959	2971		158	10.1523/jneurosci.11-10-02959.1991	https://www.scopus.com/inward/record.uri?eid=2-s2.0-0025943811&partnerID=40&md5=c762b482acb26d2cda2fe6b50ef8f6ad	Dept. of Anatomy/Cell Biology, Univ. of Kansas Medical Center, 39th and Rainbow Boulevard, Kansas City, KS 66103, United States	Cahill, G.M., Dept. of Anatomy/Cell Biology, Univ. of Kansas Medical Center, 39th and Rainbow Boulevard, Kansas City, KS 66103, United States; Besharse, J.C., Dept. of Anatomy/Cell Biology, Univ. of Kansas Medical Center, 39th and Rainbow Boulevard, Kansas City, KS 66103, United States	A circadian oscillator is located within the eye of Xenopus laevis. This oscillator regulates retinal melatonin synthesis, stimulating it at night. The primary goal of the studies reported here was to define input pathways to this circadian oscillator as a step toward identification of circadian clock mechanisms. A flow-through superfusion culture system was developed to monitor circadian rhythms…		dopamine 2 receptor; eticlopride; melatonin; quinpirole; animal tissue; article; circadian rhythm; controlled study; male; nonhuman; photostimulation; priority journal; retina; xenopus; Animal; Cells, Cultured; Circadian Rhythm; Dopamine Agents; Ergolines; Light; Male; Melatonin; Ocular Physiology; Organ Culture; Quinpirole; Receptors, Dopamine; Receptors, Dopamine D2; Retina; Support, U.S. Gov't…		eticlopride, 84226-12-0, 97612-24-3; melatonin, 73-31-4; quinpirole, 73625-62-4, 80373-22-4, 85760-75-4, 85798-08-9; Dopamine Agents; Ergolines; Melatonin, 73-31-4; Quinpirole, 85760-74-3; Receptors, Dopamine D2; Receptors, Dopamine							Cahill, G.M.; Dept. of Anatomy/Cell Biology, Univ. of Kansas Medical Center, 39th and Rainbow Boulevard, Kansas City, KS 66103, United States								2706474		JNRSD	1682423	English	J. NEUROSCI.	Article	Final		Scopus	2-s2.0-0025943811	1991_Cahill_Resetting	1991_Cahill_Resetting.pdf	https://sci-hub.se/10.1523/jneurosci.11-10-02959.1991	y
Lewy A.J., Newsome D.A.	7004848014;57200926644;	Different types of melatonin circadian secretory rhythms in some blind subjects	1983	Journal of Clinical Endocrinology and Metabolism	56	6		1103	1107		156	10.1210/jcem-56-6-1103	https://www.scopus.com/inward/record.uri?eid=2-s2.0-0020629514&doi=10.1210%2fjcem-56-6-1103&partnerID=40&md5=752179e9bb6a4d327350557f88d29a68	Departments of Psychiatry, Pharmacology, and Ophthalmology, Oregon Health Sciences University, Portland, OR, 9720, United States; Section on Retinal and Ocular Diseases, Clinical Branch, National Eye Institute, National Institutes of Health, Bethesda, MD, 20205, United States	Lewy, A.J., Departments of Psychiatry, Pharmacology, and Ophthalmology, Oregon Health Sciences University, Portland, OR, 9720, United States; Newsome, D.A., Section on Retinal and Ocular Diseases, Clinical Branch, National Eye Institute, National Institutes of Health, Bethesda, MD, 20205, United States	Six of 10 blind subjects had unusual melatonin circadian secretory patterns. One of these subjects, studied longitudinally, appeared to have a free-running melatonin secretory rhythm with a period of 24.7 h. Another subject, also studied longitudinally, appeared to secrete melatonin during the day (instead of during the night). Therefore, some blind subjects appear to have different types of circ…		melatonin; blindness; circadian rhythm; endocrine system; human; major clinical study; nervous system; visual system; Adult; Blindness; Case Report; Circadian Rhythm; Comparative Study; Female; Human; Light; Longitudinal Studies; Male; Melatonin; Middle Age; Seasons		melatonin, 73-31-4; Melatonin, 73-31-4							Lewy, A.J.; Departments of Psychiatry, Oregon Health Sciences University, Portland, OR, 9720, United States								0021972X			6841552	English	J. Clin. Endocrinol. Metab.	Article	Final	Open Access	Scopus	2-s2.0-0020629514	1983_Lewy_Different	1983_Lewy_Different.pdf	https://sci-hub.se/10.1210/jcem-56-6-1103	Y
Wood B., Rea M.S., Plitnick B., Figueiro M.G.	50961895300;57203044495;35071763800;6603467729;	Light level and duration of exposure determine the impact of self-luminous tablets on melatonin suppression	2013	Applied Ergonomics	44	2		237	240		154	10.1016/j.apergo.2012.07.008	https://www.scopus.com/inward/record.uri?eid=2-s2.0-84868157584&doi=10.1016%2fj.apergo.2012.07.008&partnerID=40&md5=0d44e39d1ba85d3b7db959224939c4dd	Lighting Research Center, Rensselaer Polytechnic Institute, 21 Union Street, Troy, NY 12180, United States	Wood, B., Lighting Research Center, Rensselaer Polytechnic Institute, 21 Union Street, Troy, NY 12180, United States; Rea, M.S., Lighting Research Center, Rensselaer Polytechnic Institute, 21 Union Street, Troy, NY 12180, United States; Plitnick, B., Lighting Research Center, Rensselaer Polytechnic Institute, 21 Union Street, Troy, NY 12180, United States; Figueiro, M.G., Lighting Research Center…	Exposure to light from self-luminous displays may be linked to increased risk for sleep disorders because these devices emit optical radiation at short wavelengths, close to the peak sensitivity of melatonin suppression. Thirteen participants experienced three experimental conditions in a within-subjects design to investigate the impact of self-luminous tablet displays on nocturnal melatonin supp…	Electronic displays; Melatonin; Tablets	Display devices; Lenses; Light emitting diodes; Blue light emitting diodes; Display manufacturers; Electronic display; Experimental conditions; Melatonin; Optical radiations; Spectral power distribution; Tablets; Hormones									Figueiro, M.G.; Lighting Research Center, Rensselaer Polytechnic Institute, 21 Union Street, Troy, NY 12180, United States; email: figuem@rpi.edu			Elsevier Ltd					36870		AERGB	22850476	English	Appl. Ergon.	Article	Final		Scopus	2-s2.0-84868157584	2013_Wood_Light	2013_Wood_Light.pdf	https://sci-hub.se/10.1016/j.apergo.2012.07.008	Y
Schernhammer E.S., Rosner B., Willet W.C., Laden F., Colditz G.A., Hankinson S.E.	7004207502;35396240300;56803239300;56752552900;57206520256;7102950324;	Epidemiology of urinary melatonin in women and its relation to other hormones and night work	2004	Cancer Epidemiology Biomarkers and Prevention	13	6		936	943		151		https://www.scopus.com/inward/record.uri?eid=2-s2.0-2942536034&partnerID=40&md5=fc31773d864fb0eda3eea8cfb813be31	Channing Laboratory, Department of Medicine, Brigham/Womens Hosp./Harvard Med. S., Boston, MA, United States; Department of Epidemiology, Harvard School of Public Health, Boston, MA, United States; Department of Biostatistics, Harvard School of Public Health, Boston, MA, United States; Department of Nutrition, Harvard School of Public Health, Boston, MA, United States; Department of Environmental…	Schernhammer, E.S., Channing Laboratory, Department of Medicine, Brigham/Womens Hosp./Harvard Med. S., Boston, MA, United States, Department of Epidemiology, Harvard School of Public Health, Boston, MA, United States, L. Boltzmann-Inst. Appl. Cancer Res., KFJ-Spital, Vienna, Austria, Channing Laboratory, 181 Longwood Avenue, Boston, MA 02115, United States; Rosner, B., Channing Laboratory, Depart…	Objective: Light exposure during night work suppresses melatonin production, and night work has been associated with an increased cancer risk. There is little information, however, about the interrelationships of night work, urinary melatonin levels, and levels of plasma steroid hormones in women. Method: We examined the reproducibility of morning urinary measurements of 6-sulfatoxymelatonin over…		androstenedione; estradiol; estrone; estrone sulfate; melatonin; prasterone; prasterone sulfate; prolactin; testosterone; adult; article; breast cancer; cancer epidemiology; cancer risk; enzyme linked immunosorbent assay; estradiol blood level; female; hormone blood level; hormone determination; human; immunoassay; light dark cycle; night; normal human; priority journal; reproducibility; shift wo…		androstenedione, 26264-53-9, 63-05-8; estradiol, 50-28-2; estrone sulfate, 438-67-5, 481-97-0; estrone, 53-16-7; melatonin, 73-31-4; prasterone sulfate, 651-48-9; prasterone, 53-43-0; prolactin, 12585-34-1, 50647-00-2, 9002-62-4; testosterone, 58-22-0; 6-sulfatoxymelatonin, 2208-40-4; Androstenedione, 63-05-8; Androstenols; Biological Markers; Creatinine, 60-27-5; Dehydroepiandrosterone, 53-43-0;…	Buhlmann 6-SMT ELISA	Quest, United States					Schernhammer, E.S.; Channing Laboratory, 181 Longwood Avenue, Boston, MA 02115, United States; email: eva.schernhammer@channing.harvard.edu								10559965		CEBPE	15184249	English	Cancer Epidemiol. Biomarkers Prev.	Article	Final		Scopus	2-s2.0-2942536034	2004_Schernhammer_Epidemiology	2004_Schernhammer_Epidemiology.pdf	https://sci-hub.se/	?
Deguchi T.	7201724482;	Circadian rhythm of serotonin N-acetyltransferase activity in organ culture of chicken pineal gland	1979	Science	203	4386		1245	1247		151	10.1126/science.424750	https://www.scopus.com/inward/record.uri?eid=2-s2.0-0018376770&doi=10.1126%2fscience.424750&partnerID=40&md5=f7003047d96b75b2516a40dcd8dc0ebc	Department of Medical Chemistry, Tokyo Metropolitan Institute for Neurosciences, Tokyo 183, Japan	Deguchi, T., Department of Medical Chemistry, Tokyo Metropolitan Institute for Neurosciences, Tokyo 183, Japan	When chicken pineal glands were organ-cultured in darkness, serotonin N-acetyltransferase activity was low during daytime, increased at midnight, and decreased on the next morning. The autonomous increase of N-acetyltransferase activity was suppressed by illumination of the glands. When pineal glands were cultured under a light-dark cycle (LD 12:12), the change of N-acetyltransferase activity con…		arylamine acetyltransferase; animal experiment; chicken; circadian rhythm; endocrine system; in vitro study; pineal body; Acetyltransferases; Animal; Chickens; Circadian Rhythm; Darkness; Light; Melatonin; Organ Culture; Pineal Gland; Serotonin		arylamine acetyltransferase, 9027-33-2; Acetyltransferases, EC 2.3.1.; Melatonin, 73-31-4; Serotonin, 50-67-9							Deguchi, T.; Department of Medical Chemistry, Tokyo Metropolitan Institute for Neurosciences, Tokyo 183, Japan								368075			424750	English		Article	Final		Scopus	2-s2.0-0018376770	1979_Deguchi_Circadian	1979_Deguchi_Circadian.pdf	https://sci-hub.se/10.1126/science.424750	Y
Cahill G.M., Grace M.S., Besharse J.C.	7005277631;7202436430;7004828252;	Rhythmic regulation of retinal melatonin: Metabolic pathways, neurochemical mechanisms, and the ocular circadian clock	1991	Cellular and Molecular Neurobiology	11	5		529	560		150	10.1007/BF00734814	https://www.scopus.com/inward/record.uri?eid=2-s2.0-0025938395&doi=10.1007%2fBF00734814&partnerID=40&md5=3de95166fa6bd99a6f8bfd1c7fc605f1	Department of Anatomy and Cell Biology, The University of Kansas Medical Center, 39th and Rainbow Boulevard, Kansas City, 66103, Kansas, United States	Cahill, G.M., Department of Anatomy and Cell Biology, The University of Kansas Medical Center, 39th and Rainbow Boulevard, Kansas City, 66103, Kansas, United States; Grace, M.S., Department of Anatomy and Cell Biology, The University of Kansas Medical Center, 39th and Rainbow Boulevard, Kansas City, 66103, Kansas, United States; Besharse, J.C., Department of Anatomy and Cell Biology, The Universi…	1. Current knowledge of the mechanisms of circadian and photic regulation of retinal melatonin in vertebrates is reviewed, with a focus on recent progress and unanswered questions. 2. Retinal melatonin synthesis is elevated at night, as a result of acute suppression by light and rhythmic regulation by a circadian oscillator, or clock, which has been localized to the eye in some species. 3. The de…	circadian rhythm; cyclic AMP; D2 dopamine receptor; Melatonin; melatonin deacetylase; retina; serotonin N-acetyltransferase; tryptophan hydroxylase	cyclic amp; dopamine 2 receptor; melatonin; melatonin deacetylase; serotonin n acetyltransferase; tryptophan hydroxylase; unclassified drug; article; circadian rhythm; nonhuman; retina; vertebrate; Animal; Arylamine N-Acetyltransferase; Circadian Rhythm; Human; Melatonin; Ocular Physiology; Retina; Support, U.S. Gov't, P.H.S.; Xenopus laevis; Anura; Vertebrata; Xenopus (genus); Xenopus laevis		Arylamine N-Acetyltransferase, EC 2.3.1.5; Melatonin, 73-31-4							Cahill, G.M.; Department of Anatomy and Cell Biology, The University of Kansas Medical Center, 39th and Rainbow Boulevard, Kansas City, 66103, Kansas, United States			Kluwer Academic Publishers-Plenum Publishers					2724340		CMNED	1742771	English	Cell Mol Neurobiol	Article	Final		Scopus	2-s2.0-0025938395	1991_Cahill_Rhythmic	1991_Cahill_Rhythmic.pdf	https://sci-hub.se/10.1007/BF00734814	Y
Reiter R., Blask D.E., Johnson L.Y., Rudeen P.K., Vaughan M.K., Waring P.J.	7402574751;7006151595;7404799497;7003722410;35582754900;7005353760;	Melatonin inhibition of reproduction in the male hamster: Its dependency on time of day of administration and on an intact and sympathetically innervated pineal gland	1976	Neuroendocrinology	22	2		107	116		150	10.1159/000122616	https://www.scopus.com/inward/record.uri?eid=2-s2.0-0017212874&doi=10.1159%2f000122616&partnerID=40&md5=12429f7f993640e2989795d53c87582a	Department of Anatomy, The University of Texas Health Science Center, San Antonio, TX, United States	Reiter, R., Department of Anatomy, The University of Texas Health Science Center, San Antonio, TX, United States; Blask, D.E., Department of Anatomy, The University of Texas Health Science Center, San Antonio, TX, United States; Johnson, L.Y., Department of Anatomy, The University of Texas Health Science Center, San Antonio, TX, United States; Rudeen, P.K., Department of Anatomy, The University o…	The daily s.c. injection of 25 μg melatonin (MEL) in oil into adult male hamsters at 7 p.m. (lights on 6 a.m. to 8 p.m.) for 50 days caused involution of the testes, coagulation of glands and seminal vesicles and depression in pituitary prolactin (Prl) levels. Similar injections of MEL given at9 a.m. completely failed to cause regression of the sex organs or a depression in pituitary Prl levels. …	Accessory sex organs; Melatonin; Pineal gland; Prolactin Reproduction; Testes	melatonin; prolactin; adrenergic system; coagulating gland; dose time effect relation; drug administration; drug inhibition; hamster; histology; in vitro study; microscopy; pharmacokinetics; pineal body; reproduction; seminal vesicle; sex difference; subcutaneous drug administration; superior cervical ganglionectomy; testis; theoretical study; Animals; Circadian Rhythm; Cricetinae; Genitalia, Mal…		melatonin, 73-31-4; prolactin, 12585-34-1, 50647-00-2, 9002-62-4; Luteinizing Hormone, 9002-67-9; Melatonin, 73-31-4; Prolactin, 9002-62-4							Reiter, R.; Department of Anatomy, The University of Texas Health Science Center at San Antonio, 7703 Floyd Curl Drive, San Antonio, TX, 78284, United States								283835			1036241	English	Neuroendocrinology	Article	Final		Scopus	2-s2.0-0017212874	1976_Reiter_Melatonin	1976_Reiter_Melatonin.pdf	https://sci-hub.se/10.1159/000122616	Y
Smith K.A., Schoen M.W., Czeisler C.A.	56302259000;7005427665;7006224092;	Adaptation of human pineal melatonin suppression by recent photic history	2004	Journal of Clinical Endocrinology and Metabolism	89	7		3610	3614		150	10.1210/jc.2003-032100	https://www.scopus.com/inward/record.uri?eid=2-s2.0-3242712893&doi=10.1210%2fjc.2003-032100&partnerID=40&md5=70b29c847b7a0667d14f255237e32054	Department of Medicine, Brigham and Women's Hospital, Harvard Medical School, Boston, MA 02115, United States; Division of Sleep Medicine, Brigham and Women's Hospital, Harvard Medical School, 221 Longwood, Boston, MA 02115, United States	Smith, K.A., Department of Medicine, Brigham and Women's Hospital, Harvard Medical School, Boston, MA 02115, United States; Schoen, M.W., Department of Medicine, Brigham and Women's Hospital, Harvard Medical School, Boston, MA 02115, United States; Czeisler, C.A., Department of Medicine, Brigham and Women's Hospital, Harvard Medical School, Boston, MA 02115, United States, Division of Sleep Medic…	The human circadiaa pacemaker controls the timing of the release of the pineal hormone melatonin, which promotes sleep, decreases body temperature, and diminishes cognitive performance. Abnormal melatonin secretion has been observed in psychiatric and circadian disorders. Although melatonin secretion is directly suppressed by exposure to light in a nonlinear intensity-dependent fashion, little re…		melatonin; adult; article; circadian rhythm; controlled study; evaluation; female; human; human experiment; laboratory test; male; molecular dynamics; normal human; pacemaker; photostimulation; phototherapy; pineal body; priority journal; Adaptation, Physiological; Adult; Circadian Rhythm; Cross-Over Studies; Dose-Response Relationship, Radiation; Female; Humans; Inpatients; Light; Male; Medical …		melatonin, 73-31-4; Melatonin, 73-31-4							Czeisler, C.A.; Division of Sleep Medicine, Brigham and Women's Hospital, Harvard Medical School, 221 Longwood, Boston, MA 02115, United States; email: caczeisler@hms.harvard.edu								0021972X		JCEMA	15240654	English	J. Clin. Endocrinol. Metab.	Article	Final	Open Access	Scopus	2-s2.0-3242712893	2004_Smith_Adaptation	2004_Smith_Adaptation.pdf	https://sci-hub.se/10.1210/jc.2003-032100	Y
Brainard G.C., Rollag M.D., Hanifin J.P.	7003540124;7004476998;7102742786;	Photic Regulation of Melatonin in Humans: Ocular and Neural Signal Transduction	1997	Journal of Biological Rhythms	12	6		537	546		148	10.1177/074873049701200608	https://www.scopus.com/inward/record.uri?eid=2-s2.0-0031298994&doi=10.1177%2f074873049701200608&partnerID=40&md5=a8e3f62e696b70ffa74c693ae5d1033a	Department of Neurology, Thomas Jefferson University, Jefferson Medical College, Philadelphia, PA 19107, United States; Department of Anatomy, Uniformed Serv. Univ. of Hlth. Sci., Bethesda, MD 20814, United States	Brainard, G.C., Department of Neurology, Thomas Jefferson University, Jefferson Medical College, Philadelphia, PA 19107, United States; Rollag, M.D., Department of Anatomy, Uniformed Serv. Univ. of Hlth. Sci., Bethesda, MD 20814, United States; Hanifin, J.P., Department of Neurology, Thomas Jefferson University, Jefferson Medical College, Philadelphia, PA 19107, United States	Light is a potent stimulus for regulating the pineal gland's production of melatonin and the broader circadian system in humans. It initially was thought that only very bright photic stimuli (≥ 2500 lux) could suppress nocturnal melatonin secretion and induce other circadian responses. It is now known that markedly lower illuminances (≤ 200 lux) can acutely suppress melatonin or entrain and phase…	Eye; Lens; Light; Melatonin suppression; Photoreceptor; Pineal gland; Pupil	melatonin; animal; human; metabolism; photoperiodicity; physiology; pineal body; review; Animals; Humans; Melatonin; Photoperiod; Pineal Gland		Melatonin, 73-31-4							Brainard, G.C.; Department of Neurology, Thomas Jefferson University, Jefferson Medical College, Philadelphia, PA 19107, United States			SAGE Publications Inc.					7487304		JBRHE	9406028	English	J. Biol. Rhythms	Article	Final		Scopus	2-s2.0-0031298994	1997_Brainard_Photic	1997_Brainard_Photic.pdf	https://sci-hub.se/10.1177/074873049701200608	Y
Schernhammer E.S., Hankinson S.E.	7004207502;7102950324;	Urinary melatonin levels and breast cancer risk	2005	Journal of the National Cancer Institute	97	14		1084	1087		147	10.1093/jnci/dji190	https://www.scopus.com/inward/record.uri?eid=2-s2.0-23244435107&doi=10.1093%2fjnci%2fdji190&partnerID=40&md5=d4a3281bb49ea3c137bc59ca45df4db2	Channing Laboratory, Department of Medicine, Brigham and Women's Hospital and Harvard Medical School, 181 Longwood Ave., Boston, MA 02115, United States; Department of Epidemiology, Harvard School of Public Health, Boston, MA, United States; LBI-ACR VIEnna, ACR-ITR VIEnna, Vienna, Austria	Schernhammer, E.S., Channing Laboratory, Department of Medicine, Brigham and Women's Hospital and Harvard Medical School, 181 Longwood Ave., Boston, MA 02115, United States, Department of Epidemiology, Harvard School of Public Health, Boston, MA, United States, LBI-ACR VIEnna, ACR-ITR VIEnna, Vienna, Austria; Hankinson, S.E., Channing Laboratory, Department of Medicine, Brigham and Women's Hospit…	Exposure to light at night suppresses melatonin production, and night-shift work (a surrogate for such exposure) has been associated with an increased risk of breast cancer. However, the association between circulating melatonin levels and breast cancer risk is unclear. In a prospective case-control study nested within the Nurses' Health Study II cohort, we measured the concentration of the major…		melatonin; sex hormone; 6 hydroxymelatonin o sulfate; 6-sulfatoxymelatonin; drug derivative; melatonin; adult; article; breast cancer; cancer invasion; cancer risk; case control study; confidence interval; controlled study; female; hormone blood level; human; logistic regression analysis; major clinical study; metabolite; priority journal; risk assessment; statistical model; urine level; aged; br…		melatonin, 73-31-4; 6 hydroxymelatonin o sulfate, 2208-40-4; 6-sulfatoxymelatonin, 2208-40-4; Melatonin, 73-31-4							Schernhammer, E.S.; Channing Laboratory, 181 Longwood Ave., Boston, MA 02115, United States; email: eva.schernhammer@channing.harvard.edu								278874		JNCIA	16030307	English	J. Natl. Cancer Inst.	Article	Final	Open Access	Scopus	2-s2.0-23244435107	2005_Schernhammer_Urinary	2005_Schernhammer_Urinary.pdf	https://sci-hub.se/10.1093/jnci/dji190	Y
Dahl G.E., Buchanan B.A., Tucker H.A.	7101887818;7102530288;7101622988;	Photoperiodic effects on dairy cattle: A review	2000	Journal of Dairy Science	83	4		885	893		147	10.3168/jds.S0022-0302(00)74952-6	https://www.scopus.com/inward/record.uri?eid=2-s2.0-0034170670&doi=10.3168%2fjds.S0022-0302%2800%2974952-6&partnerID=40&md5=5ddbcf3e0956496d8d6416dd6f927be9	Dept. of Animal and Avian Sciences, University of Maryland, College Park, MD 20742, United States; Animal Reproduction Laboratory, Department of Animal Science, Michigan State University, East Lansing, MI 48824, United States; Dept. of Animal and Avian Sciences, University of Maryland, 1415 Animal Sciences Center, College Park, MD 20742-2311, United States; Cornell Cooperative Extension, St. Lawr…	Dahl, G.E., Dept. of Animal and Avian Sciences, University of Maryland, College Park, MD 20742, United States, Dept. of Animal and Avian Sciences, University of Maryland, 1415 Animal Sciences Center, College Park, MD 20742-2311, United States; Buchanan, B.A., Animal Reproduction Laboratory, Department of Animal Science, Michigan State University, East Lansing, MI 48824, United States, Cornell Coo…	Since the initial report in 1978 of galactopoietic effects of a photoperiod of 16 h of light:8 h of darkness, numerous studies have confirmed long-day stimulation of milk yield. The endocrine factor(s) responsible for increased milk yield, however, has eluded identification. Recent studies suggest that insulin-like growth factor-I (IGF-I) may mediate the galactopoietic response to long day photop…	Insulin-like growth factor-I; Management; Milk yield; Photoperiod	melatonin; somatomedin C; animal; cattle; female; lactation; metabolism; photoperiodicity; physiology; reproduction; review; signal transduction; Animals; Cattle; Female; Insulin-Like Growth Factor I; Lactation; Melatonin; Photoperiod; Reproduction; Signal Transduction		Insulin-Like Growth Factor I, 67763-96-6; Melatonin, 73-31-4			Alabama Agricultural Experiment Station Michigan Agriculture Experiment Station U.S. Department of Agriculture: 901-15-2, 592261-D2-072-0, 84-CRSR-2-2340, 87-CRCR-1-2302	We thank A.R.E. Miller, J. D. Smith, J. A. Coyne, L. T. Chapin, A. S. Kimrey, E. P. Stanisiewski, L. W. Douglass, R. A. Erdman, R. R. Peters, A. V. Capuco, and T. H. Elsasser for their valuable contributions to many of the studies described in this review. In addition, we thank the farm crews at the Central Maryland Research and Education Center Dairy Unit, Clarksville and the Michigan State Univ…			Dahl, G.E.; Dept. of Animal and Avian Sciences, University of Maryland, 1415 Animal Sciences Center, College Park, MD 20742-2311, United States; email: gd38@umail.umd.edu			American Dairy Science Association					220302			10791806	English	J. Dairy Sci.	Article	Final	Open Access	Scopus	2-s2.0-0034170670	2000_Dahl_Photoperiodic	2000_Dahl_Photoperiodic.pdf	https://sci-hub.se/10.3168/jds.S0022-0302(00)74952-6	Y
Wever R.A., Polášek J., Wildgruber C.M.	7005648110;36765603700;7409718930;	Bright light affects human circadian rhythms	1983	Pflügers Archiv European Journal of Physiology	396	1		85	87		145	10.1007/BF00584704	https://www.scopus.com/inward/record.uri?eid=2-s2.0-0020672116&doi=10.1007%2fBF00584704&partnerID=40&md5=3e12b9254e29ab4903df6b594aa98bdc	Arbeitsgruppe Chronobiologie, Max-Planck-Institut für Psychiatrie, Andechs, D-8138, Germany	Wever, R.A., Arbeitsgruppe Chronobiologie, Max-Planck-Institut für Psychiatrie, Andechs, D-8138, Germany; Polášek, J., Arbeitsgruppe Chronobiologie, Max-Planck-Institut für Psychiatrie, Andechs, D-8138, Germany; Wildgruber, C.M., Arbeitsgruppe Chronobiologie, Max-Planck-Institut für Psychiatrie, Andechs, D-8138, Germany	The relative effectiveness of external zeitgebers synchronizing circadian rhythms can be evaluated by mesuring the size of the range of entrainment. The experimental approach to measure entrainment limits is the application of an artificial zeitgeber with slowly and steadily changing period. In human circadian rhythms, an absolute light-dark (LD) cycle with a light intensity during L of 100 lux o…	Bright light effects; Human circadian rhythms; Limits of entrainment; Melatonin threshold	melatonin; central nervous system; circadian rhythm; human; human experiment; luminance; normal human; photoperiodicity; zeitgeber; Body Temperature; Circadian Rhythm; Differential Threshold; Human; Light; Melatonin; Time Factors		melatonin, 73-31-4; Melatonin, 73-31-4							Wever, R.A.; Arbeitsgruppe Chronobiologie, Max-Planck-Institut für Psychiatrie, Andechs, D-8138, Germany			Springer-Verlag					316768		PFLAB	6835810	English	Pflugers Arch.	Article	Final		Scopus	2-s2.0-0020672116	1983_Wever_Bright	1983_Wever_Bright.pdf	https://sci-hub.se/10.1007/BF00584704	Y
Leproult R., Colecchia E.F., L'Hermite-Balériaux M., Van Cauter E.	6701318493;6507669580;7004179456;7004866563;	Transition from dim to bright light in the morning induces an immediate elevation of cortisol levels	2001	Journal of Clinical Endocrinology and Metabolism	86	1		151	157		143	10.1210/jc.86.1.151	https://www.scopus.com/inward/record.uri?eid=2-s2.0-0035142214&doi=10.1210%2fjc.86.1.151&partnerID=40&md5=25fae251a8280c0d02f231c010185f1b	Department of Medicine, University of Chicago, Chicago, IL 60637, United States; Laboratoire de Médecine Expérimentale, Centre d'Etude des Rythmes Biologiques, Université Libre de Bruxelles, B-1070, Brussels, Belgium; Department of Medicine, MC 1027, University of Chicago, 5841 South Maryland Avenue, Chicago, IL 60637, United States	Leproult, R., Department of Medicine, University of Chicago, Chicago, IL 60637, United States, Laboratoire de Médecine Expérimentale, Centre d'Etude des Rythmes Biologiques, Université Libre de Bruxelles, B-1070, Brussels, Belgium; Colecchia, E.F., Department of Medicine, University of Chicago, Chicago, IL 60637, United States; L'Hermite-Balériaux, M., Laboratoire de Médecine Expérimentale, Centr…	The only well documented effect of light exposure on endocrine function is the suppression of nocturnal melatonin. Bright light exposure has behavioral effects, including the alleviation of sleepiness during nocturnal sleep deprivation. The present study examines the effects of bright light on the profiles of hormones known to be affected by sleep deprivation (TSH) or involved in behavioral activ…		hydrocortisone; melatonin; thyrotropin; adult; alertness; article; circadian rhythm; clinical article; glucose infusion; hormone determination; human; hydrocortisone release; light dark cycle; male; night sleep; performance; priority journal; sleep deprivation; sleep waking cycle; suprachiasmatic nucleus; Adult; Arousal; Circadian Rhythm; Cognition; Hormones; Humans; Hydrocortisone; Light; Male; …		Hormones; Hydrocortisone, 50-23-7; Melatonin, 73-31-4; Thyrotropin, 9002-71-5							Van Cauter, E.; Department of Medicine, MC 1027, University of Chicago, 5841 South Maryland Avenue, Chicago, IL 60637, United States; email: evcauter@medicine.bsd.uchicago.edu								0021972X		JCEMA	11231993	English	J. Clin. Endocrinol. Metab.	Article	Final		Scopus	2-s2.0-0035142214	2001_Leproult_Transition	2001_Leproult_Transition.pdf	https://sci-hub.se/10.1210/jc.86.1.151	?
Shah P.N., Mhatre M.C., Kothari L.S.	7403284993;7003283640;7006465144;	Effect of Melatonin on Mammary Carcinogenesis in Intact and Pinealectomized Rats in Varying Photoperiods	1984	Cancer Research	44	8		3403	3407		143		https://www.scopus.com/inward/record.uri?eid=2-s2.0-0021191984&partnerID=40&md5=43498840c43b1e8f2ad110e2ad4458c9	Endocrinology Division, Cancer Research Institute, Parel, Bombay 400012, India	Shah, P.N., Endocrinology Division, Cancer Research Institute, Parel, Bombay 400012, India; Mhatre, M.C., Endocrinology Division, Cancer Research Institute, Parel, Bombay 400012, India; Kothari, L.S., Endocrinology Division, Cancer Research Institute, Parel, Bombay 400012, India	Exposure of female Holtzman rats to constant light (24 hr/day) immediately after birth significantly increased 9,10-dimethyl-1,2-benzanthracene-induced mammary cancer. Such “functionally pinealectomized animals also revealed significant increase in the circulating level of prolactin and exaggerated development and proliferative activity of mammary epithelium, as measured by quantitation of termin…		7,12 dimethylbenz[a]anthracene; melatonin; animal model; breast; breast cancer; central nervous system; chemical carcinogenesis; drug efficacy; endocrine system; light; nonhuman; pinealectomy; rat; 9,10-Dimethyl-1,2-benzanthracene; Animal; Darkness; DNA Replication; Estradiol; Female; Light; Mammae; Mammary Neoplasms, Experimental; Melatonin; Pineal Gland; Prolactin; Rats		7,12 dimethylbenz[a]anthracene, 57-97-6; melatonin, 73-31-4; 9,10-Dimethyl-1,2-benzanthracene, 57-97-6; Estradiol, 50-28-2; Melatonin, 73-31-4; Prolactin, 9002-62-4															85472			6430548	English	Cancer Res.	Article	Final		Scopus	2-s2.0-0021191984	1984_Shah_Effect	1984_Shah_Effect.pdf	https://sci-hub.se/	?
Glickman G., Byrne B., Pineda C., Hauck W.W., Brainard G.C.	7003492763;8336699800;20434842800;7006476606;7003540124;	Light therapy for Seasonal Affective Disorder with blue narrow-band light-emitting diodes (LEDs)	2006	Biological Psychiatry	59	6		502	507		141	10.1016/j.biopsych.2005.07.006	https://www.scopus.com/inward/record.uri?eid=2-s2.0-33644618421&doi=10.1016%2fj.biopsych.2005.07.006&partnerID=40&md5=3fccf777f61cbf9f0d7eb81db6f68d9f	Department of Neurology, Thomas Jefferson University, United States; Division of Clinical Pharmacology, Biostatitics Division, Thomas Jefferson University, United States; Margolis Berman Byrne Health Psychology, Philadelphia, PA, United States; Department of Biology, Northeastern University, Boston, MA, United States; Department of Neurology, College Building, Jefferson Medical College, 1025 Waln…	Glickman, G., Department of Neurology, Thomas Jefferson University, United States, Department of Biology, Northeastern University, Boston, MA, United States; Byrne, B., Margolis Berman Byrne Health Psychology, Philadelphia, PA, United States; Pineda, C., Department of Neurology, Thomas Jefferson University, United States; Hauck, W.W., Division of Clinical Pharmacology, Biostatitics Division, Thom…	Background: While light has proven an effective treatment for Seasonal Affective Disorder (SAD), an optimal wavelength combination has not been determined. Short wavelength light (blue) has demonstrated potency as a stimulus for acute melatonin suppression and circadian phase shifting. Methods: This study tested the efficacy of short wavelength light therapy for SAD. Blue light emitting diode (LE…	Blue; Circadian; LED; Light therapy; Seasonal Affective Disorder; Wavelength	melatonin; adult; aged; analysis of covariance; article; blue light; clinical article; controlled study; disease severity; female; Hamilton scale; human; light emitting diode; major depression; male; phototherapy; priority journal; randomization; scoring system; seasonal affective disorder; sleep time; structured interview; sunlight; treatment outcome; Adult; Aged; Circadian Rhythm; Color; Equipm…		melatonin, 73-31-4			National Institute of Neurological Disorders and Stroke: RO1NS36590 National Aeronautics and Space Administration: NCC 9-58 National Space Biomedical Research Institute National Institute of Mental Health: 1R43 MH066453-01 National Institute of Neurological Disorders and Stroke	In this trial, narrow-band LED technology was utilized to selectively test wavelength effects on SAD symptoms. Specifically, short-wavelength LEDs of 468 nm significantly outperformed the dim long-wavelength LED condition. Remission rates in patients using the 468 nm light panel were comparable to those typically reported in patients utilizing current standard bright white light treatment. Regard…			Brainard, G.C.; Department of Neurology, College Building, Jefferson Medical College, 1025 Walnut Street, Philadelphia, PA 19107, United States; email: george.brainard@jefferson.edu								63223		BIPCB	16165105	English	Biol. Psychiatry	Article	Final		Scopus	2-s2.0-33644618421	2006_Glickman_Light	2006_Glickman_Light.pdf	https://sci-hub.se/10.1016/j.biopsych.2005.07.006	Y
Rüger M., Gordijn M.C.M., Beersma D.G.M., De Vries B., Daan S.	8881472100;6603047956;7006783605;35966111700;7006263782;	Time-of-day-dependent effects of bright light exposure on human psychophysiology: Comparison of daytime and nighttime exposure	2006	American Journal of Physiology - Regulatory Integrative and Comparative Physiology	290	5		R1413	R1420		141	10.1152/ajpregu.00121.2005	https://www.scopus.com/inward/record.uri?eid=2-s2.0-33646468237&doi=10.1152%2fajpregu.00121.2005&partnerID=40&md5=7056187ee17699a0e7ed42b50b39a7c2	Department of Chronobiology, University of Groningen, Groningen, Netherlands; Center for Brain Health, New York University Medical School, New York, NY, United States; Centre for Brain Health, NYU Medical School, 550 First Ave., New York, NY 10016, United States	Rüger, M., Department of Chronobiology, University of Groningen, Groningen, Netherlands, Center for Brain Health, New York University Medical School, New York, NY, United States, Centre for Brain Health, NYU Medical School, 550 First Ave., New York, NY 10016, United States; Gordijn, M.C.M., Department of Chronobiology, University of Groningen, Groningen, Netherlands; Beersma, D.G.M., Department o…	Bright light can influence human psychophysiology instantaneously by inducing endocrine (suppression of melatonin, increasing cortisol levels), other physiological changes (enhancement of core body temperature), and psychological changes (reduction of sleepiness, increase of alertness). Its broad range of action is reflected in the wide field of applications, ranging from optimizing a work enviro…	Core body temperature; Cortisol; Heart rate; Sleepiness	hydrocortisone; article; brightness; controlled study; core temperature; electrocardiography; energy; fatigue; heart rate; human; human experiment; light exposure; male; night; normal human; priority journal; psychophysiology; saliva; scoring system; somnolence; tachycardia; time perception; Adult; Body Temperature; Circadian Rhythm; Fatigue; Heart Rate; Humans; Hydrocortisone; Light; Sleep Stages		hydrocortisone, 50-23-7; Hydrocortisone, 50-23-7							Rüger, M.; Centre for Brain Health, NYU Medical School, 550 First Ave., New York, NY 10016, United States; email: Melanie.Rueger@med.nyu.edu								3636119		AJPRD	16373441	English	Am. J. Physiol. Regul. Integr. Comp. Physiol.	Article	Final		Scopus	2-s2.0-33646468237	2006_Rüger_Time-of-day-dependent	2006_Rüger_Time-of-day-dependent.pdf	https://sci-hub.se/10.1152/ajpregu.00121.2005	Y
Berger R.J., Phillips N.H.	7403563028;7201972731;	Energy conservation and sleep	1995	Behavioural Brain Research	69	2019-02-01		65	73		138	10.1016/0166-4328(95)00002-B	https://www.scopus.com/inward/record.uri?eid=2-s2.0-0029070716&doi=10.1016%2f0166-4328%2895%2900002-B&partnerID=40&md5=7f828fe7367b8ebf97820f1afa700f4d	Sinsheimer Laboratories, Department of Biology, University of California, Santa Cruz, CA 95064, United States	Berger, R.J., Sinsheimer Laboratories, Department of Biology, University of California, Santa Cruz, CA 95064, United States; Phillips, N.H., Sinsheimer Laboratories, Department of Biology, University of California, Santa Cruz, CA 95064, United States	Phylogenetic and ontogenetic associations between sleep and endothermy are consistent with the hypothesis that sleep evolved in conjuction with endothermy to offset the high energetic cost of endothermy. The electrophysiological and thermoregulatory continuum of slow wave sleep, circadian torpor and hibernation substantiates a primordial link between sleep and energy conservation. Sleep constitut…	Body temperature; Hibernation; Light; Melatonin; Metabolism; Sleep; Torpor	melatonin; animal experiment; bat; circadian rhythm; conference paper; controlled study; energy expenditure; nonhuman; pigeon; priority journal; sleep; thermoregulation; Animal; Body Temperature Regulation; Energy Metabolism; Hibernation; Human; Phylogeny; Sleep									Berger, R.J.; Sinsheimer Laboratories, Department of Biology, University of California, Santa Cruz, CA 95064, United States; email: berger@biology.ucsc.edu								1664328		BBRED	7546319	English	Behav. Brain Res.	Article	Final		Scopus	2-s2.0-0029070716	1995_Berger_Energy	1995_Berger_Energy.pdf	https://sci-hub.se/10.1016/0166-4328(95)00002-B	Y
Brainard G.C., Sliney D., Hanifin J.P., Glickman G., Byrne B., Greeson J.M., Jasser S., Gerner E., Rollag M.D.	7003540124;7005443783;7102742786;7003492763;8336699800;6603018311;56633292700;8336699900;7004476998;	Sensitivity of the human circadian system to short-wavelength (420-nm) light	2008	Journal of Biological Rhythms	23	5		379	386		135	10.1177/0748730408323089	https://www.scopus.com/inward/record.uri?eid=2-s2.0-51849146719&doi=10.1177%2f0748730408323089&partnerID=40&md5=b2946f87e983fc0852acc33c393fd8f1	Department of Neurology, Thomas Jefferson University, Philadelphia, PA, United States; Laser/Optical Radiation Program, US Army Center for Health Promotion and Preventive Medicine, Aberdeen Proving Ground, MD, United States; Department of Neurology, Thomas Jefferson University, 1025 Walnut Street, Philadelphia, PA 19107, United States; 406 Streamside Drive, Fallston, MD 21047-2806, United States;…	Brainard, G.C., Department of Neurology, Thomas Jefferson University, Philadelphia, PA, United States, Department of Neurology, Thomas Jefferson University, 1025 Walnut Street, Philadelphia, PA 19107, United States; Sliney, D., Laser/Optical Radiation Program, US Army Center for Health Promotion and Preventive Medicine, Aberdeen Proving Ground, MD, United States, 406 Streamside Drive, Fallston, M…	The circadian and neurobehavioral effects of light are primarily mediated by a retinal ganglion cell photoreceptor in the mammalian eye containing the photopigment melanopsin. Nine action spectrum studies using rodents, monkeys, and humans for these responses indicate peak sensitivities in the blue region of the visible spectrum ranging from 459 to 484 nm, with some disagreement in short-waveleng…	Action spectrum; Circadian; Light; Melatonin; Neuroendocrine; Photoreception; Pineal gland; Wavelength	melatonin; adult; article; circadian rhythm; density; female; hormone inhibition; human; human experiment; light irradiance; male; night; normal human; photon; photoreceptor; photostimulation; physiology; priority journal; quantitative analysis; sensitivity analysis; spectral sensitivity; volunteer; Adult; Circadian Rhythm; Female; Humans; Light; Male; Melatonin; Models, Biological; Neurosecretor…		melatonin, 73-31-4; Melatonin, 73-31-4							Brainard, G. C.; Department of Neurology, Thomas Jefferson University, 1025 Walnut Street, Philadelphia, PA 19107, United States; email: george.brainard@jefferson.edu								7487304		JBRHE	18838601	English	J. Biol. Rhythms	Article	Final		Scopus	2-s2.0-51849146719	2008_Brainard_Sensitivity	2008_Brainard_Sensitivity.pdf	https://sci-hub.se/10.1177/0748730408323089	Y
Musshoff U., Riewenherm D., Berger E., Fauteck J.-D., Speckmann E.-J.	7003980019;6504071404;7202374177;6603152555;7103260830;	Melatonin receptors in rat hippocampus: Molecular and functional investigations	2002	Hippocampus	12	2		165	173		134	10.1002/hipo.1105	https://www.scopus.com/inward/record.uri?eid=2-s2.0-0036224536&doi=10.1002%2fhipo.1105&partnerID=40&md5=ea4ef4ea71dd2d7aa3baf8fed90723f7	Institute of Physiology, University of Münster, Münster, Germany; FIS International, Kalletal, Germany; Institut für Physiologie, Robert-Koch-Str. 27a, 48149 Münster, Germany	Musshoff, U., Institute of Physiology, University of Münster, Münster, Germany, Institut für Physiologie, Robert-Koch-Str. 27a, 48149 Münster, Germany; Riewenherm, D., Institute of Physiology, University of Münster, Münster, Germany; Berger, E., Institute of Physiology, University of Münster, Münster, Germany; Fauteck, J.-D., FIS International, Kalletal, Germany; Speckmann, E.-J., Institute of Ph…	Since binding sites for melatonin have been found in the hippocampus of several mammals, it has been suggested that the pineal hormone melatonin is able to modulate neuronal functions of hippocampal cells. In order to get more insight into the role of melatonin for the functions of hippocampal cells, the following experiments were performed: male rats, maintained under a 12/12-h light-dark cycle,…	Diurnal rhythm; Hippocampus slice; Melatonin; MT1 receptor; MT2 receptor; Xenopus oocyte	calcium; chloride; luzindole; melatonin; melatonin derivative; melatonin receptor; messenger RNA; pineal body hormone; tetralin derivative; action potential; animal cell; animal experiment; animal tissue; article; binding site; brain function; brain nerve cell; brain slice; cell function; chloride current; controlled study; decapitation; dentate gyrus; electrophysiology; gene expression; genetic …		2-phenylmelatonin; 4-phenyl-2-propionamidotetraline; 5-methoxycarbonylamino-N-acetyltryptamine; luzindole, 117946-91-5; Melatonin, 73-31-4; Receptors, Cell Surface; Receptors, Cytoplasmic and Nuclear; Receptors, Melatonin; RNA, Messenger; Tetrahydronaphthalenes; Tryptamines							Musshoff, U.; Institut für Physiologie, University of Münster, Robert-Koch-Str. 27a, 48149 Münster, Germany; email: mushoff@uni-muenster.de								10509631		HIPPE	12000116	English	Hippocampus	Article	Final		Scopus	2-s2.0-0036224536	2002_Musshoff_Melatonin	2002_Musshoff_Melatonin.pdf	https://sci-hub.se/10.1002/hipo.1105	Y
Reiter R.J.	7402574751;	Static and extremely low frequency electromagnetic field exposure: Reported effects on the circadian production of melatonin	1993	Journal of Cellular Biochemistry	51	4		394	403		134	10.1002/jcb.2400510403	https://www.scopus.com/inward/record.uri?eid=2-s2.0-0027464856&doi=10.1002%2fjcb.2400510403&partnerID=40&md5=673dc48d405cf3bc46c387abd2bead59	Department of Cellular and Structural Biology, University of Texas Health Science Center at San Antonio, San Antonio, Texas, 78284-7762, United States	Reiter, R.J., Department of Cellular and Structural Biology, University of Texas Health Science Center at San Antonio, San Antonio, Texas, 78284-7762, United States	The circadian rhythm of melatonin production (high melatonin levels at night and low during the day) in the mammalian pineal gland is modified by visible portions of the electromagnetic spectrum, i.e., light, and reportedly by extremely low frequency (ELF) electromagnetic fields as well as by static magnetic field exposure. Both light and non‐visible electromagnetic field exposure at night depres…	light and pineal function; mammalian pineal gland; nocturnal suppression of melatonin; serotonin metabolism; sinusoidal electric and magnetic field exposure; static magnetic field exposure	melatonin; circadian rhythm; electromagnetic field; light; magnetic field; mammal; nonhuman; pineal body; priority journal; review; Acetylserotonin N-Methyltransferase; Animal; Arylamine N-Acetyltransferase; Autonomic Fibers, Postganglionic; Circadian Rhythm; Electromagnetic Fields; Enzyme Induction; Human; Male; Mammals; Melatonin; Models, Biological; Neurotransmitters; Pineal Gland; Rats; Secre…		melatonin, 73-31-4; Acetylserotonin N-Methyltransferase, EC 2.1.1.4; Arylamine N-Acetyltransferase, EC 2.3.1.5; Melatonin, 73-31-4; Neurotransmitters							Reiter, R.J.; Department of Cellular and Structural Biology, University of Texas Health Science Center at San Antonio, San Antonio, Texas, 78284-7762, United States								7302312			8098713	English	J. Cell. Biochem.	Article	Final		Scopus	2-s2.0-0027464856	1993_Reiter_Static	1993_Reiter_Static.pdf	https://sci-hub.se/10.1002/jcb.2400510403	Y
Burgess H.J., Fogg L.F.	35619659300;7003418034;	Individual differences in the amount and timing of salivary melatonin secretion	2008	PLoS ONE	3	8	e3055				133	10.1371/journal.pone.0003055	https://www.scopus.com/inward/record.uri?eid=2-s2.0-52449086104&doi=10.1371%2fjournal.pone.0003055&partnerID=40&md5=a820e66512089ea8efb0825d169582e1	Biological Rhythms Research Laboratory, Department of Behavioral Sciences, Rush University Medical Center, Chicago, IL, United States	Burgess, H.J., Biological Rhythms Research Laboratory, Department of Behavioral Sciences, Rush University Medical Center, Chicago, IL, United States; Fogg, L.F., Biological Rhythms Research Laboratory, Department of Behavioral Sciences, Rush University Medical Center, Chicago, IL, United States	Background: The aim of this study was to examine individual differences in a large sample of complete melatonin profiles not suppressed by light and search for possible associations between the amount and timing of melatonin secretion and a multitude of lifestyle variables. The melatonin profiles were derived from saliva samples collected every 30 minutes in dim light from 85 healthy women and 85…		contraceptive agent; melatonin; melatonin; adult; age distribution; article; behavior; contact lens; controlled study; employment status; female; hormonal contraception; hormone release; hormone synthesis; human; human experiment; lifestyle; male; mania; normal human; paranoia; periodicity; salivation; sleep pattern; wakefulness; adolescent; body mass; darkness; kinetics; light; middle aged; race…		melatonin, 73-31-4; Melatonin, 73-31-4							Burgess, H.J.; Biological Rhythms Research Laboratory, Department of Behavioral Sciences, Rush University Medical Center, Chicago, IL, United States; email: Helen_J_Burgess@rush.edu								19326203			18725972	English	PLoS ONE	Article	Final	Open Access	Scopus	2-s2.0-52449086104	2008_Burgess_Individual	2008_Burgess_Individual.pdf	https://sci-hub.se/10.1371/journal.pone.0003055	Y
Oh J.H., Yang S.J., Do Y.R.	35216284700;55351916100;7103101103;	Healthy, natural, efficient and tunable lighting: Four-package white LEDs for optimizing the circadian effect, color quality and vision performance	2014	Light: Science and Applications	3	2	e141	e141			126	Degradation of melatonin by UV, UV/H2O2, Fe2+/H2O2 and UV/Fe2+/H2O2 processes.	https://www.scopus.com/inward/record.uri?eid=2-s2.0-84928993880&doi=10.1038%2flsa.2014.22&partnerID=40&md5=a982d10f593f71967d271788357a9030	Department of Chemistry, Kookmin University, Seoul, 136-702, South Korea	Oh, J.H., Department of Chemistry, Kookmin University, Seoul, 136-702, South Korea; Yang, S.J., Department of Chemistry, Kookmin University, Seoul, 136-702, South Korea; Do, Y.R., Department of Chemistry, Kookmin University, Seoul, 136-702, South Korea	To date, most current reports on the development and optimization of artificial lighting sources have focused on the energy performance levels and limited color qualities of white light-emitting diodes (LEDs). However, these properties are insufficient in terms of representing all performance levels required when adjusting white LEDs for healthy and smart lighting. Here, we introduce essential an…	Color quality; Solid-state lighting; Vision performance; White LED	Color; Color vision; Energy conservation; Energy efficiency; Lighting; Artificial lighting; Color quality; Energy performance; Performance level; Solid state lighting; Tunable lightings; White LED; White light emitting diodes; Light emitting diodes					National Research Foundation of Korea, NRF Ministry of Science ICT and Future Planning, MSIP: 2011-0017449 National Research Foundation of Korea, NRF	This work was supported by the National Research Foundation of Korea(NRF) grant funded by the Korea government(MSIP) (No. 2011-0017449).			Do, Y.R.; Department of Chemistry, Kookmin UniversitySouth Korea			Nature Publishing Group					20477538				English	Light Sci. Appl.	Article	Final	Open Access	Scopus	2-s2.0-84928993880	2014_Oh_Healthy,	2014_Oh_Healthy,.pdf	https://sci-hub.se/Degradation of melatonin by UV, UV/H2O2, Fe2+/H2O2 and UV/Fe2+/H2O2 processes.	Y
Brainard G.C., Richardson B.A., King T.S., Matthews S.A., Reiter R.J.	7003540124;7202396064;25950264800;7201477461;7402574751;	The suppression of pineal melatonin content and n-acetyitransferase activity by different light irradiances in the syrian hamster: A dose-response relationship	1983	Endocrinology	113	1		293	296		126	10.1210/endo-113-1-293	https://www.scopus.com/inward/record.uri?eid=2-s2.0-0020593982&doi=10.1210%2fendo-113-1-293&partnerID=40&md5=615d1bc16c6ea13acde03c2f965adda3	Department of Anatomy, University of Texas Health Science Center at San Antonio, San Antonio, TE, 78284, United States; Department of Anatomy, School of Medicine, American University of the Caribbean, P. O. Box 400, Plymouth, Montserrat	Brainard, G.C., Department of Anatomy, University of Texas Health Science Center at San Antonio, San Antonio, TE, 78284, United States; Richardson, B.A., Department of Anatomy, University of Texas Health Science Center at San Antonio, San Antonio, TE, 78284, United States, Department of Anatomy, School of Medicine, American University of the Caribbean, P. O. Box 400, Plymouth, Montserrat; King, T…	The purpose of this study was to test the influence of various irradiances of cool white fluorescent light on the suppression of pineal N-acetyltransferase activity (NAT) and melatonin content in hamsters. Groups of animals were exposed to light irradiances ranging from 0.00–1.86 microwatts (μW)/cm2 for 20 min during the night. Both pineal NAT and melatonin were similarly depressed by the light i…		acyltransferase; melatonin; animal experiment; biological model; central nervous system; dose response; drug response; ecology; endocrine system; light; nonhuman; pineal body; syrian hamster; Acetyltransferases; Animals; Cricetinae; Dose-Response Relationship, Radiation; Male; Mathematics; Melatonin; Mesocricetus; Photic Stimulation; Pineal Gland		acyltransferase, 9012-30-0, 9054-54-0; melatonin, 73-31-4; Acetyltransferases, 2.3.1.-; Melatonin, 73-31-4															137227			6861704	English	Endocrinology	Article	Final		Scopus	2-s2.0-0020593982	1983_Brainard_The	1983_Brainard_The.pdf	https://sci-hub.se/10.1210/endo-113-1-293	Y
West K.E., Jablonski M.R., Warfield B., Cecil K.S., James M., Ayers M.A., Maida J., Bowen C., Sliney D.H., Rollag M.D., Hanifin J.P., Brainard G.C.	43761697500;35248292900;43761695900;57197414479;43761169700;43761015000;6602179979;36707205900;7005443783;7004476998;7102742786;7003540124;	Blue light from light-emitting diodes elicits a dose-dependent suppression of melatonin in humans	2011	Journal of Applied Physiology	110	3		619	626		124	10.1152/japplphysiol.01413.2009	https://www.scopus.com/inward/record.uri?eid=2-s2.0-79954624257&doi=10.1152%2fjapplphysiol.01413.2009&partnerID=40&md5=16afeb3a92993b2ffa40120d404b03d2	Department of Neurology, Thomas Jefferson University, Philadelphia, PA, United States; Habitability and Human Factors Branch, Johnson Space Center, Houston, TX, United States; U.S. Army Environmental Hygiene Agency, Aberdeen Proving Ground, Aberdeen, MD, United States; Dept. of Neurology, Thomas Jefferson Univ., Philadelphia, PA 19107, United States	West, K.E., Department of Neurology, Thomas Jefferson University, Philadelphia, PA, United States; Jablonski, M.R., Department of Neurology, Thomas Jefferson University, Philadelphia, PA, United States; Warfield, B., Department of Neurology, Thomas Jefferson University, Philadelphia, PA, United States; Cecil, K.S., Department of Neurology, Thomas Jefferson University, Philadelphia, PA, United Sta…	West KE, Jablonski MR, Warfield B, Cecil KS, James M, Ayers MA, Maida J, Bowen C, Sliney DH, Rollag MD, Hanifin JP, Brainard GC. Blue light from light-emitting diodes elicits a dose-dependent suppression of melatonin in humans. J Appl Physiol 110: 619-626, 2011. First published December 16, 2010; doi:10.1152/japplphysiol.01413.2009.-Light suppresses melatonin in humans, with the strongest respons…	Light-emitting diode; Pineal	melatonin; adult; article; blood; circadian rhythm; color; human; illumination; metabolic clearance rate; methodology; photostimulation; physiology; radiation dose; radiation exposure; radiation response; retina; semiconductor; Circadian Rhythm; Color; Dose-Response Relationship, Radiation; Humans; Lighting; Melatonin; Metabolic Clearance Rate; Photic Stimulation; Radiation Dosage; Retina; Semico…		melatonin, 73-31-4; Melatonin, 73-31-4							Brainard, G. C.; Dept. of Neurology, Thomas Jefferson Univ., Philadelphia, PA 19107, United States; email: george.brainard@jefferson.edu								87507587		JAPHE	21164152	English	J. Appl. Physiol.	Article	Final		Scopus	2-s2.0-79954624257	2011_West_Blue	2011_West_Blue.pdf	https://sci-hub.se/10.1152/japplphysiol.01413.2009	Y
Ebihara S., Kawamura H.	56496474600;57189669247;	The role of the pineal organ and the suprachiasmatic nucleus in the control of circadian locomotor rhythms in the Java sparrow, Padda oryzivora	1981	Journal of Comparative Physiology □ A	141	2		207	214		123	10.1007/BF01342667	https://www.scopus.com/inward/record.uri?eid=2-s2.0-0002326835&doi=10.1007%2fBF01342667&partnerID=40&md5=c0b3b88f33fdd83bb183a8b50fbb2c96	Laboratory of Physiological Psychology and Laboratory of Neurophysiology, Mitsubishi-Kasei Institute of Life Sciences, 11 Minamiooya, Machida-shi, Tokyo, 194, Japan	Ebihara, S., Laboratory of Physiological Psychology and Laboratory of Neurophysiology, Mitsubishi-Kasei Institute of Life Sciences, 11 Minamiooya, Machida-shi, Tokyo, 194, Japan; Kawamura, H., Laboratory of Physiological Psychology and Laboratory of Neurophysiology, Mitsubishi-Kasei Institute of Life Sciences, 11 Minamiooya, Machida-shi, Tokyo, 194, Japan	The roles of the pineal organ and the suprachiasmatic nucleus (SCN) in the control of circadian rhythms of locomotor activity were examined in male Java sparrows (Padda oryzivora). 1. Removal of the pineal organ resulted in (i) no interference with entrainment to a light-dark (LD) cycle with anticipatory activity, (ii) appearance of residual circadian rhythmicity for a while after transfer from a…											Ebihara, S.; Laboratory of Physiological Psychology and Laboratory of Neurophysiology, Mitsubishi-Kasei Institute of Life Sciences, 11 Minamiooya, Machida-shi, Tokyo, 194, Japan			Springer-Verlag					3407594		JCPAD		English	J. Comp. Physiol.	Article	Final		Scopus	2-s2.0-0002326835	1981_Ebihara_The	1981_Ebihara_The.pdf	https://sci-hub.se/10.1007/BF01342667	Y
Hoffmann K.	57205355994;	Photoperiod, Pineal, Melatonin and Reproduction in Hamsters	1979	Progress in Brain Research	52	C		397	415		123	10.1016/S0079-6123(08)62946-5	https://www.scopus.com/inward/record.uri?eid=2-s2.0-0018625897&doi=10.1016%2fS0079-6123%2808%2962946-5&partnerID=40&md5=ec529ae249c4343ca82bc077cedad877	Max-Planck-Institute für Verhaltensphysiologie, 8131 Andechs (F.R.G.), Germany	Hoffmann, K., Max-Planck-Institute für Verhaltensphysiologie, 8131 Andechs (F.R.G.), Germany	Many mammalian species show a marked annual cycle of gonadal and other functions. In a number of cases it has been shown that the photoperiod, i.e., the length of the daily light cycle and its changes, are involved in the regulation of this cycle. In spring and summer breeders short photoperiods lead to gonadal regression, and long photoperiods stimulate recrudescence, while the opposite may hold…		melatonin; animal; article; circadian rhythm; hamster; histology; light; male; organ weight; physiology; pineal body; reproduction; season; testis; time; Animal; Circadian Rhythm; Hamsters; Light; Male; Melatonin; Organ Weight; Pineal Gland; Reproduction; Seasons; Testis; Time Factors		melatonin, 73-31-4; Melatonin, 73-31-4							Hoffmann, K.; Max-Planck-Institute für Verhaltensphysiologie, 8131 Andechs (F.R.G.), Germany								796123			575802	English	Prog. Brain Res.	Article	Final		Scopus	2-s2.0-0018625897	1979_Hoffmann_Photoperiod,	1979_Hoffmann_Photoperiod,.pdf	https://sci-hub.se/10.1016/S0079-6123(08)62946-5	Y
Schwartzbaum J., Ahlbom A., Feychting M.	7004348822;7004338224;7004562617;	Cohort study of cancer risk among male and female shift workers	2007	Scandinavian Journal of Work, Environment and Health	33	5		336	343		122	10.5271/sjweh.1150	https://www.scopus.com/inward/record.uri?eid=2-s2.0-36549015188&doi=10.5271%2fsjweh.1150&partnerID=40&md5=b5fecb1f86353a0285e62335ba4cac79	Division of Epidemiology, School of Public Health, Ohio State University, 320 W. Tenth Ave, Columbus, OH 43210, United States; Division of Epidemiology, Institute for Environmental Medicine, Karolinska Institutet, Stockholm, Sweden; Comprehensive Cancer Center, Ohio State University, Columbus, OH, United States	Schwartzbaum, J., Division of Epidemiology, School of Public Health, Ohio State University, 320 W. Tenth Ave, Columbus, OH 43210, United States, Division of Epidemiology, Institute for Environmental Medicine, Karolinska Institutet, Stockholm, Sweden, Comprehensive Cancer Center, Ohio State University, Columbus, OH, United States; Ahlbom, A., Division of Epidemiology, Institute for Environmental M…	Objectives: Melatonin, a hormone that inhibits experimentally induced cancers, is suppressed by nighttime exposure to light so that nighttime shift workers may be at an increased risk of cancer. Previous studies of shift workers found an increased risk of breast cancer among women and suggested a possible increased risk of colon cancer among women and prostate cancer. The present study was conduc…	Cancer; Melatonin	cancer; cohort analysis; health risk; mental health; occupational exposure; womens health; adult; article; breast cancer; cancer incidence; cancer risk; cohort analysis; confidence interval; death; female; follow up; human; major clinical study; male; night work; occupational exposure; occupational health; priority journal; prostate cancer; sex ratio; shift worker; standardization									Schwartzbaum, J.; Division of Epidemiology, School of Public Health, Ohio State University, 320 W. Tenth Ave, Columbus, OH 43210, United States; email: schwartzbaum.1@osu.edu			Finnish Institute of Occupational Health					3553140		SWEHD	17973059	English	Scand. J. Work Environ. Health	Article	Final		Scopus	2-s2.0-36549015188	2007_Schwartzbaum_Cohort	2007_Schwartzbaum_Cohort.pdf	https://sci-hub.se/10.5271/sjweh.1150	?
Feychting M., Österlund B., Ahlbom A.	7004562617;6602468357;7004338224;	Reduced cancer incidence among the blind	1998	Epidemiology	9	5		490	494		122	10.1097/00001648-199809000-00004	https://www.scopus.com/inward/record.uri?eid=2-s2.0-0031842090&doi=10.1097%2f00001648-199809000-00004&partnerID=40&md5=bf2b95d2dbe5ee0330170523262a9779	Institute of Environmental Medicine, Karolinska Institutet, Stockholm, Sweden; Institute of Environmental Medicine, Karolinska Institutet, Box 210, S-171 77 Stockholm, Sweden	Feychting, M., Institute of Environmental Medicine, Karolinska Institutet, Stockholm, Sweden, Institute of Environmental Medicine, Karolinska Institutet, Box 210, S-171 77 Stockholm, Sweden; Österlund, B., Institute of Environmental Medicine, Karolinska Institutet, Stockholm, Sweden; Ahlbom, A., Institute of Environmental Medicine, Karolinska Institutet, Stockholm, Sweden	Melatonin is a hormone primarily produced by the pineal gland at night and is suppressed by exposure to light. Experimental studies have indicated that melatonin may protect against cancer development. In the majority of totally blind people, melatonin is never suppressed by light exposure. The aim of this study was to test the hypothesis that blind people have a decreased cancer incidence, and t…	Blindness; Cancer; Melatonin; Visual impairment	melatonin; adult; aged; article; blindness; cancer incidence; female; human; human cell; human tissue; hypothesis; light exposure; major clinical study; male; priority journal; risk assessment; visual impairment		melatonin, 73-31-4							Feychting, M.; Institute of Environmental Medicine, Karolinska Instituter, Box 210, S-171 77 Stockholm, Sweden			Lippincott Williams and Wilkins					10443983		EPIDE	9730026	English	Epidemiology	Article	Final		Scopus	2-s2.0-0031842090	1998_Feychting_Reduced	1998_Feychting_Reduced.pdf	https://sci-hub.se/10.1097/00001648-199809000-00004	Y
Von Gall C., Duffield G.E., Hastings M.H., Kopp M.D.A., Dehghani F., Korf H.-W., Stehle J.H.	6603424010;6701530908;35482382900;7101946319;6603954871;7006341661;7004337412;	CREB in the mouse SCN: A molecular interface coding the phase-adjusting stimuli light, glutamate, PACAP, and melatonin for clockwork access	1998	Journal of Neuroscience	18	24		10389	10397		121		https://www.scopus.com/inward/record.uri?eid=2-s2.0-0032535338&partnerID=40&md5=55194e58f0c428e0cb870699f12f7ee5	Anatomisches Institut II, Johann Wolfgang Goethe-Univ., D-60590 Frankfurt, Germany; Department of Anatomy, University of Cambridge, Cambridge CB2 3DY, United Kingdom; Max-Planck-lnstitut F. P., W. G. Kerckhoff-Institut, D-61231 Bad Nauheim, Germany; Anatomisches Institut II, Johann Wolfgang Goethe-Univ., Theodor-Stern-Kai 7, D-60590 Frankfurt, Germany	Von Gall, C., Anatomisches Institut II, Johann Wolfgang Goethe-Univ., D-60590 Frankfurt, Germany; Duffield, G.E., Department of Anatomy, University of Cambridge, Cambridge CB2 3DY, United Kingdom; Hastings, M.H., Max-Planck-lnstitut F. P., W. G. Kerckhoff-Institut, D-61231 Bad Nauheim, Germany; Kopp, M.D.A., Anatomisches Institut II, Johann Wolfgang Goethe-Univ., Theodor-Stern-Kai 7, D-60590 Fran…	The suprachiasmatic nucleus (SCN) is a central pacemaker in mammals, driving many endogenous circadian rhythms. An important pacemaker target is the regulation of a hormonal message for darkness, the circadian rhythm in melatonin synthesis. The endogenous clock within the SCN is synchronized to environmental light/dark cycles by photic information conveyed via the retinohypothalamic tract (RHT) a…	Brain slice; Circadian; CREB (Ca2+/cAMP response element-binding protein); Glutamate; Melatonin; Mice; PACAP (pituitary adenylate cyclase-activating polypeptide); Phase shifts; Suprachiasmatic nucleus	calcium ion; cyclic AMP responsive element binding protein; glutamic acid; hypophysis adenylate cyclase activating polypeptide; melatonin; animal cell; animal experiment; article; brain slice; circadian rhythm; controlled study; feedback system; hormonal regulation; immunocytochemistry; light; locomotion; mouse; neurotransmission; nonhuman; priority journal; suprachiasmatic nucleus; Animals; Biol…		Adcyap1 protein, mouse; Cyclic AMP Response Element-Binding Protein; Glutamic Acid, 56-86-0; Melatonin, 73-31-4; Neuropeptides; Pituitary Adenylate Cyclase-Activating Polypeptide							Stehle, J.H.; Dr. Senckenbergische Anatomie, Anatomisches Institut II, Johann Wolfgang Goethe-Universitat, Theodor-Stern-Kai 7, D-60590 Frankfurt, Germany								2706474		JNRSD	9852576	English	J. Neurosci.	Article	Final		Scopus	2-s2.0-0032535338	1998_Von_CREB	1998_Von_CREB.pdf	https://sci-hub.se/	?
Depres-Brummer P., Levi F., Metzger G., Touitou Y.	6603367770;7202914622;7006821651;7103005333;	Light-induced suppression of the rat circadian system	1995	American Journal of Physiology - Regulatory Integrative and Comparative Physiology	268	5 37-5		R1111	R1116		121		https://www.scopus.com/inward/record.uri?eid=2-s2.0-0029009658&partnerID=40&md5=289fe472cc6cb5cdf3e16310c2d6f19a	LRBC, Universite Paris XI, Hopital Paul Brousse, 94800 Villejuif, France	Depres-Brummer, P., LRBC, Universite Paris XI, Hopital Paul Brousse, 94800 Villejuif, France; Levi, F., LRBC, Universite Paris XI, Hopital Paul Brousse, 94800 Villejuif, France; Metzger, G., LRBC, Universite Paris XI, Hopital Paul Brousse, 94800 Villejuif, France; Touitou, Y., LRBC, Universite Paris XI, Hopital Paul Brousse, 94800 Villejuif, France	In a constant environment, circadian rhythms persist with slightly altered period lengths. Results of studies with continuous light exposure are less clear, because of short exposure durations and single-variable monitoring. This study sought to characterize properties of the oscillator(s) controlling the rat's circadian system by monitoring both body temperature and locomotor activity. We observ…	biological clock; body temperature; circadian rhythms; desynchronization; locomotor activity; melatonin; ultradian rhythms	melatonin; animal experiment; article; biological rhythm; body temperature; circadian rhythm; controlled study; light; light exposure; locomotion; male; nonhuman; priority journal; rat; ultradian rhythm; Animal; Body Temperature; Circadian Rhythm; Darkness; Light; Male; Melatonin; Motor Activity; Photoperiod; Rats; Rats, Sprague-Dawley; Support, Non-U.S. Gov't		melatonin, 73-31-4; Melatonin, 73-31-4							Levi, F.; LRBC, Universite Paris XI, Hopital Paul Brousse, 94800 Villejuif, France								3636119		AJPRD	7771569	English	AM. J. PHYSIOL. REGUL. INTEGR. COMP. PHYSIOL.	Article	Final		Scopus	2-s2.0-0029009658	1995_Depres-Brummer_Light-induced	1995_Depres-Brummer_Light-induced.pdf	https://sci-hub.se/	?
La Morgia C., Ross-Cisneros F.N., Sadun A.A., Hannibal J., Munarini A., Mantovani V., Barboni P., Cantalupo G., Tozer K.R., Sancisi E., Salomao S.R., Moraes M.N., Moraes-Filho M.N., Heegaard S., Milea D., Kjer P., Montagna P., Carelli V.	7801365051;6508127888;7006740007;7006477440;6506566689;6701807627;7004674365;6601947217;16310954800;8239140400;7003518936;16316604900;26431079300;7004251127;6701636955;6602358400;35371025800;7005210889;	Melanopsin retinal ganglion cells are resistant to neurodegeneration in mitochondrial optic neuropathies	2010	Brain	133	8		2426	2438		120	10.1093/brain/awq155	https://www.scopus.com/inward/record.uri?eid=2-s2.0-77957039148&doi=10.1093%2fbrain%2fawq155&partnerID=40&md5=2c5abafb5e5b2646542c72796449e653	Department of Neurological Sciences, University of Bologna, Bologna 40127, Italy; Department of Ophthalmology, Keck School of Medicine, University of Southern California, Los Angeles, CA 90033, United States; Department of Clinical Biochemistry, Bispebjerg Hospital and Rigshopitalet, University of Copenhagen, Copenhagen 2400, Denmark; Biomedical Centre Applied Research CRBA, S.Orsola-Malpighi Uni…	La Morgia, C., Department of Neurological Sciences, University of Bologna, Bologna 40127, Italy; Ross-Cisneros, F.N., Department of Ophthalmology, Keck School of Medicine, University of Southern California, Los Angeles, CA 90033, United States; Sadun, A.A., Department of Ophthalmology, Keck School of Medicine, University of Southern California, Los Angeles, CA 90033, United States; Hannibal, J., …	Mitochondrial optic neuropathies, that is, Leber hereditary optic neuropathy and dominant optic atrophy, selectively affect retinal ganglion cells, causing visual loss with relatively preserved pupillary light reflex. The mammalian eye contains a light detection system based on a subset of retinal ganglion cells containing the photopigment melanopsin. These cells give origin to the retinohypothal…	Circadian rhythms; LHON; Mitochondrial diseases; Neuro-ophthalmology; Neuropathology	melanopsin; melatonin; melanopsin; scotopsin; adult; article; circadian rhythm; clinical article; controlled study; female; hormone release; human; human cell; immunohistochemistry; Leber hereditary optic neuropathy; light; male; nerve degeneration; optic nerve atrophy; priority journal; retina ganglion cell; aging; autosomal dominant optic atrophy; case control study; disorders of mitochondrial …		melanopsin, 403476-86-8; melatonin, 73-31-4; Rod Opsins; melanopsin; melanopsin; Rod Opsins			Research to Prevent Blindness National Institutes of Health: EY03040	This project was supported, in part, by a Telethon-Italy grant # GGP06233 (V.C.), the International Foundation for Optic Nerve Diseases (F.N.R.-C., A.A.S., V.C. and S.R.S.), Research to Prevent Blindness (F.N.R.-C., A.A.S. and K.R.T.), Struggling Within Leber’s Foundation (F.N.R.-C., A.A.S. and K.R.T.), National Institutes of Health grant EY03040 (F.N.R.-C., A.A.S. and K.R.T.) and the Ermian Foun…			Carelli, V.; Department of Neurological Sciences, University of Bologna, Via Ugo Foscolo 7, 40123 Bologna, Italy; email: valerio.carelli@unibo.it								68950		BRAIA	20659957	English	Brain	Article	Final	Open Access	Scopus	2-s2.0-77957039148	2010_La_Melanopsin	2010_La_Melanopsin.pdf	https://sci-hub.se/10.1093/brain/awq155	Y
Messager S., Hazlerigg D.G., Mercer J.G., Morgan P.J.	6701599782;6701834786;7202467618;7402394770;	Photoperiod differentially regulates the expression of Per1 and ICER in the pars tuberalis and the suprachiasmatic nucleus of the Siberian hamster	2000	European Journal of Neuroscience	12	8		2865	2870		118	10.1046/j.1460-9568.2000.00174.x	https://www.scopus.com/inward/record.uri?eid=2-s2.0-0033816396&doi=10.1046%2fj.1460-9568.2000.00174.x&partnerID=40&md5=3e21c7340a6f9d4ee5cca4cfde94c7be	Molecular Neuroendocrinology Unit, Rowett Research Institute, Greenburn Road, Bucksburn, Aberdeen AB21 9SB, United Kingdom; Department of Agriculture, University of Aberdeen, 581 King Street, Aberdeen AB24 5UA, United Kingdom	Messager, S., Molecular Neuroendocrinology Unit, Rowett Research Institute, Greenburn Road, Bucksburn, Aberdeen AB21 9SB, United Kingdom, Department of Agriculture, University of Aberdeen, 581 King Street, Aberdeen AB24 5UA, United Kingdom; Hazlerigg, D.G., Department of Agriculture, University of Aberdeen, 581 King Street, Aberdeen AB24 5UA, United Kingdom; Mercer, J.G., Molecular Neuroendocrino…	Previous studies demonstrated that the clock gene Per1 and the transcription factor ICER are expressed rhythmically in the suprachiasmatic nucleus (SCN) and in the pars tuberalis (PT). In the Syrian hamster the duration of photoperiod affects the amplitude of gene expression in the PT, and melatonin administered before lights-on suppressed the peak of Per1/ICER expression; these effects were not …	Clock gene; Melatonin; Phodopus sungorus; Rhythm; Seasonal	gene product; melatonin; protein per 1; transcription factor; transcription factor icer; unclassified drug; animal tissue; article; controlled study; gene expression regulation; hypophysis pars tuberalis; in situ hybridization; male; molecular cloning; nonhuman; photoperiodicity; priority journal; protein localization; species differentiation; suprachiasmatic nucleus; Animals; Anticonvulsants; Ci…		Anticonvulsants; Cyclic AMP Response Element Modulator, 135844-64-3; DNA-Binding Proteins; Melatonin, 73-31-4; Nuclear Proteins; Repressor Proteins; RNA, Messenger							Messager, S.; Department of Agriculture, University of Aberdeen, 581 King Street, Aberdeen AB24 5UA, United Kingdom; email: s.messager@abdn.ac.uk								0953816X		EJONE	10971629	English	Eur. J. Neurosci.	Article	Final		Scopus	2-s2.0-0033816396	2000_Messager_Photoperiod	2000_Messager_Photoperiod.pdf	https://sci-hub.se/10.1046/j.1460-9568.2000.00174.x	Y
Moenter S.M., Woodfill C.J.I., Karsch F.J.	7003806957;6602464479;7101883690;	Role of the thyroid gland in seasonal reproduction: Thyroidectomy blocks seasonal suppression of reproductive neuroendocrine activity in ewes	1991	Endocrinology	128	3		1337	1344		115	10.1210/endo-128-3-1337	https://www.scopus.com/inward/record.uri?eid=2-s2.0-0025762040&doi=10.1210%2fendo-128-3-1337&partnerID=40&md5=fa67f7ef1e1cb1ecc5debfebbd65b09e	Department of Physiology, University of Michigan, Ann Arbor, MI, 48109-0404, United States	Moenter, S.M., Department of Physiology, University of Michigan, Ann Arbor, MI, 48109-0404, United States; Woodfill, C.J.I., Department of Physiology, University of Michigan, Ann Arbor, MI, 48109-0404, United States; Karsch, F.J., Department of Physiology, University of Michigan, Ann Arbor, MI, 48109-0404, United States	Seasonal reproductive transitions in ewes are generated endogenously and are synchronized by annual changes in photoperiod. Previous evidence indicates that thyroidectomy prevents the transition to anestrus in ewes maintained in a fixed day length, suggesting that the thyroid is needed for endogenously generated reproductive arrest. Here we tested the hypothesis that the thyroid is required for e…		estradiol; luteinizing hormone; melatonin; prolactin; animal experiment; article; controlled study; female; nonhuman; priority journal; reproduction; seasonal variation; thyroidectomy; Animal; Circadian Rhythm; Estradiol; Female; Luteinizing Hormone; Melatonin; Neurosecretory Systems; Pulsatile Flow; Reproduction; Seasons; Sheep; Support, Non-U.S. Gov't; Support, U.S. Gov't, P.H.S.; Thyroid Gland…		estradiol, 50-28-2; luteinizing hormone, 39341-83-8, 9002-67-9; melatonin, 73-31-4; prolactin, 12585-34-1, 50647-00-2, 9002-62-4; Estradiol, 50-28-2; Luteinizing Hormone, 9002-67-9; Melatonin, 73-31-4							Karsch, F.J.; Reproductive Sciences Program, 300 North Ingalls Building, Room 1101 SW, Ann Arbor, MI, 48109-0404, United States								137227			1999155	English	Endocrinology	Article	Final		Scopus	2-s2.0-0025762040	1991_Moenter_Role	1991_Moenter_Role.pdf	https://sci-hub.se/10.1210/endo-128-3-1337	Y
Kloog I., Haim A., Stevens R.G., Portnov B.A.	23667564700;35555504100;56788478400;6603723508;	Global co-distribution of light at night (LAN) and cancers of prostate, colon, and lung in men	2009	Chronobiology International	26	1		108	125		114	10.1080/07420520802694020	https://www.scopus.com/inward/record.uri?eid=2-s2.0-60549089407&doi=10.1080%2f07420520802694020&partnerID=40&md5=0a4f5121ab5830f74aa7b1b4add55ca7	Department of Natural Resources and Environmental Management, Faculty of Social Sciences, University of Haifa, Haifa, Israel; Departments of Biology and Evolutionary and Environmental Biology, University of Haifa, Haifa, Israel; University of Connecticut Health Center, Farmington, CT, United States; Department of Natural Resources and Environmental Management, Faculty of Social Sciences, Universi…	Kloog, I., Department of Natural Resources and Environmental Management, Faculty of Social Sciences, University of Haifa, Haifa, Israel; Haim, A., Departments of Biology and Evolutionary and Environmental Biology, University of Haifa, Haifa, Israel; Stevens, R.G., University of Connecticut Health Center, Farmington, CT, United States; Portnov, B.A., Department of Natural Resources and Environment…	The incidence rates of cancers in men differ by countries of the world. We compared the incidence rates of three of the most common cancers (prostate, lung, and colon) in men residing in 164 different countries with the population-weighted light at night (LAN) exposure and with several developmental and environmental indicators, including per capita income, percent urban population, and electrici…	Epidemiology; Geography; Incidence rates; LAN; Prostate cancer	Circadian Rhythm; Colonic Neoplasms; Electricity; Humans; Incidence; Light; Lung Neoplasms; Male; Prostatic Neoplasms; Risk Factors; Urban Population; World Health									Portnov, B. A.; Department of Natural Resources and Environmental Management, Faculty of Social Sciences, University of Haifa, Mount Carmel, 31905, Haifa, Israel; email: portnov@nrem.haifa.ac.il								7420528		CHBIE	19142761	English	Chronobiol. Int.	Article	Final		Scopus	2-s2.0-60549089407	2009_Kloog_Global	2009_Kloog_Global.pdf	https://sci-hub.se/10.1080/07420520802694020	Y
Reppert S.M., Perlow M.J., Ungerleider L.G., Mishkin M., Tamarkin L., Orloff D.G., Hoffman H.J., Klein D.C.	7006606071;7003478379;7005043169;7007041182;7003640553;7004305245;7201677665;7402360691;	Effects of damage to the suprachiasmatic area of the anterior hypothalamus on the daily melatonin and cortisol rhythms in the rhesus monkey	1981	Journal of Neuroscience	1	12		1414	1425		114	10.1523/jneurosci.01-12-01414.1981	https://www.scopus.com/inward/record.uri?eid=2-s2.0-0019847262&partnerID=40&md5=68620a57353c4aff4f9ad90bfd8c2936	Sect. Neuroendocrinol., Lab. Developm. Neurobiol. Nat. Inst. Child Hlth Hum. Developm., NIH, Bethesda, MD 20205, United States	Reppert, S.M., Sect. Neuroendocrinol., Lab. Developm. Neurobiol. Nat. Inst. Child Hlth Hum. Developm., NIH, Bethesda, MD 20205, United States; Perlow, M.J., Sect. Neuroendocrinol., Lab. Developm. Neurobiol. Nat. Inst. Child Hlth Hum. Developm., NIH, Bethesda, MD 20205, United States; Ungerleider, L.G., Sect. Neuroendocrinol., Lab. Developm. Neurobiol. Nat. Inst. Child Hlth Hum. Developm., NIH, Be…	The effects of lesions of the suprachiasmatic nucleus (SCN) on the circadian rhythms in melatonin and cortisol were examined in the rhesus monkey. The concentrations of the two hormones were monitored in cerebrospinal fluid (CSF) withdrawn from two sham-operated animals, two animals with complete bilateral SCN lesions, and two animals with partial SCN damage at 4 and 8 months after surgery. In th…		hydrocortisone; melatonin; animal experiment; central nervous system; cerebrospinal fluid; circadian rhythm; endocrine system; hypothalamus; monkey; supraoptic nucleus; Amino Acids; Animals; Autoradiography; Circadian Rhythm; Hydrocortisone; Hypothalamus; Macaca mulatta; Male; Melatonin; Supraoptic Nucleus; Tritium		hydrocortisone, 50-23-7; melatonin, 73-31-4; Amino Acids; Hydrocortisone, 50-23-7; Melatonin, 73-31-4; Tritium, 10028-17-8															2706474		JNRSD	7320754	English	J. NEUROSCI.	Article	Final		Scopus	2-s2.0-0019847262	1981_Reppert_Effects	1981_Reppert_Effects.pdf	https://sci-hub.se/10.1523/jneurosci.01-12-01414.1981	Y
Wright H.R., Lack L.C.	7202463101;34467711900;	Effect of light wavelength on suppression and phase delay of the melatonin rhythm	2001	Chronobiology International	18	5		801	808		113	10.1081/CBI-100107515	https://www.scopus.com/inward/record.uri?eid=2-s2.0-0035214603&doi=10.1081%2fCBI-100107515&partnerID=40&md5=01aa7a441c886d7d9c915b0c394eb3d8	School of Psychology, Flinders University, P.O. Box 2100, Adelaide, SA 5001, Australia	Wright, H.R., School of Psychology, Flinders University, P.O. Box 2100, Adelaide, SA 5001, Australia; Lack, L.C., School of Psychology, Flinders University, P.O. Box 2100, Adelaide, SA 5001, Australia	Different wavelengths of light were compared for melatonin suppression and phase shifting of the salivary melatonin rhythm. The wavelengths compared were 660 nm (red), 595 nm (amber), 525 nm (green), 497 nm (blue/green), and 470 nm (blue). They were administered with light-emitting diodes equated for irradiance of 130 μW/cm2. Fifteen volunteers participated in all five wavelength conditions and a…	Light; Melatonin; Phase shift; Wavelength	melatonin; adult; article; circadian rhythm; controlled study; female; hormone inhibition; human; human experiment; light; male; night; normal human; saliva level; spectrum; Adult; Biophysics; Circadian Rhythm; Female; Humans; Light; Male; Melatonin; Pineal Gland; Retina; Saliva		Melatonin, 73-31-4							Lack, L.C.; School of Psychology, Flinders University, P.O. Box 2100, Adelaide, SA 5001, Australia; email: leon.lack@flinders.edu.au								7420528		CHBIE	11763987	English	Chronobiol. Int.	Article	Final		Scopus	2-s2.0-0035214603	2001_Wright_Effect	2001_Wright_Effect.pdf	https://sci-hub.se/10.1081/CBI-100107515	Y
Davis S., Kaune W.T., Mirick D.K., Chen C., Stevens R.G.	55465579200;7005614508;6506871448;15118867200;56788478400;	Residential magnetic fields, light-at-night, and nocturnal urinary 6-sulfatoxymelatonin concentration in women	2001	American Journal of Epidemiology	154	7		591	600		113	10.1093/aje/154.7.591	https://www.scopus.com/inward/record.uri?eid=2-s2.0-0035479181&doi=10.1093%2faje%2f154.7.591&partnerID=40&md5=aaf36de637a9b7558e6736f166b04dae	Program in Epidemiology, Division of Public Health Sciences, Fred Hutchinson Cancer Research Center, Seattle, WA, United States; Department of Epidemiology, School of Public Health and Community Medicine, University of Washington, Seattle, WA, United States; EM Factors, Richland, WA, United States; Department of Community Medicine, University of Connecticut Health Center, Farmington, CT, United S…	Davis, S., Program in Epidemiology, Division of Public Health Sciences, Fred Hutchinson Cancer Research Center, Seattle, WA, United States, Department of Epidemiology, School of Public Health and Community Medicine, University of Washington, Seattle, WA, United States, Fred Hutchinson Cancer Research Center, 1100 Fairview Avenue North MP-474, Seattle, WA 98109-1024, United States; Kaune, W.T., EM…	Exposure to 60-Hz magnetic fields may increase breast cancer risk by suppressing the normal nocturnal rise in melatonin. This 1994-1996 Washington State study investigated whether such exposure was associated with lower nocturnal urinary concentration of 6-sulfatoxymelatonin in 203 women aged 20-74 years with no history of breast cancer. Each woman was interviewed and provided data on the followi…	Breast neoplasms; Carcinogens, environmental; Circadian rhythm; Electricity; Electromagnetic fields; Melatonin	6 hydroxymelatonin o sulfate; beta adrenergic receptor blocking agent; calcium channel blocking agent; psychotropic agent; cancer; electromagnetic field; health risk; womens health; adult; aged; alcohol consumption; article; body mass; breast cancer; cancer risk; circadian rhythm; drug utilization; electricity; female; hormone urine level; human; magnetic field; major clinical study; night; radia…		6-sulfatoxymelatonin, 2208-40-4; Adrenergic beta-Antagonists; Calcium Channel Blockers; Melatonin, 73-31-4; Psychotropic Drugs		Cidtech Research, Canada	Fred Hutchinson Cancer Research Center: WO 2964-24 Electric Power Research Institute: WO 2964-25	This research was supported by the Electric Power Research Institute through contracts with EM Factors of Richland, Washington (WO 2964-25) and the Fred Hutchinson Cancer Research Center in Seattle, Washington (WO 2964-24).			Davis, S.; Fred Hutchinson Cancer Res. Center, 1100 Fairview Avenue North MP-474, Seattle, WA 98109-1024, United States; email: sdavis@fhcrc.org								29262		AJEPA	11581092	English	Am. J. Epidemiol.	Article	Final	Open Access	Scopus	2-s2.0-0035479181	2001_Davis_Residential	2001_Davis_Residential.pdf	https://sci-hub.se/10.1093/aje/154.7.591	Y
Chang A.-M., Santhi N., St Hilaire M., Gronfier C., Bradstreet D.S., Duffy J.F., Lockley S.W., Kronauer R.E., Czeisler C.A.	28567503000;8945315800;8862575500;56150474600;54082702500;56494099000;56751118900;57196395263;7006224092;	Human responses to bright light of different durations	2012	Journal of Physiology	590	13		3103	3112		112	10.1113/jphysiol.2011.226555	https://www.scopus.com/inward/record.uri?eid=2-s2.0-84863000137&doi=10.1113%2fjphysiol.2011.226555&partnerID=40&md5=cdf519632fe7ea3b053b58260e9d7a2d	Division of Sleep Medicine, Department of Medicine, Brigham and Women's Hospital, 221 Longwood Avenue, Boston, MA, United States; Division of Sleep Medicine, Harvard Medical School, Boston, MA, United States; University of Surrey, Guildford, Surrey, United Kingdom; Inserm, U846, Stem Cell and Brain Research Institute, Department of Chronobiology, Université Claude Bernard Lyon, Bron, Lyon I, Fran…	Chang, A.-M., Division of Sleep Medicine, Department of Medicine, Brigham and Women's Hospital, 221 Longwood Avenue, Boston, MA, United States, Division of Sleep Medicine, Harvard Medical School, Boston, MA, United States; Santhi, N., Division of Sleep Medicine, Department of Medicine, Brigham and Women's Hospital, 221 Longwood Avenue, Boston, MA, United States, Division of Sleep Medicine, Harvar…	Light exposure in the early night induces phase delays of the circadian rhythm in melatonin in humans. Previous studies have investigated the effect of timing, intensity, wavelength, history and pattern of light stimuli on the human circadian timing system. We present results from a study of the duration-response relationship to phase-delaying bright light. Thirty-nine young healthy participants …		melatonin; adult; alertness; article; bright light; circadian rhythm; controlled study; female; human; human experiment; light; light exposure; male; normal human; priority journal; somnolence; time; Adolescent; Adult; Circadian Rhythm; Female; Humans; Light; Male; Melatonin; Sleep; Time Factors; Young Adult		melatonin, 73-31-4; Melatonin, 73-31-4							Chang, A.-M.; Division of Sleep Medicine, Department of Medicine, Brigham and Women's Hospital/Harvard Medical School, 221 Longwood Avenue, Suite 438, Boston, MA 02115, United States; email: amchang@rics.bwh.harvard.edu								223751		JPHYA	22526883	English	J. Physiol.	Article	Final		Scopus	2-s2.0-84863000137	2012_Chang_Human	2012_Chang_Human.pdf	https://sci-hub.se/10.1113/jphysiol.2011.226555	Y
Arendt J., Bojkowski C., Folkard S., Franey C., Marks V., Minors D., Waterhouse J., Wever R.A., Wildgruber C., Wright J.	7101704924;6602339871;7006135716;6603360737;7102803771;56249491600;7102956346;7005648110;7409718930;55301262700;	Some effects of melatonin and the control of its secretion in humans.	1985	Ciba Foundation symposium	117			266	283		111	10.1002/9780470720981.ch16	https://www.scopus.com/inward/record.uri?eid=2-s2.0-0022199642&partnerID=40&md5=e162c24ca26958f26cd7b295cf7c4ddd	Department of Biochemistry, Division of Clinical Biochemistry, University of Surrey, Guildford, Surrey, UK, MRC Cognitive & Perceptual Performance Unit, University of Sussex, Falmer, Brighton, Sussex, UK, Department of Physiology, University of Manchester, Manchester, UK, and Max-Planck Institut fur Psychiatrie, 0-8138 Andechs, Federal Republic of Germany	Arendt, J.; Bojkowski, C.; Folkard, S.; Franey, C.; Marks, V.; Minors, D.; Waterhouse, J.; Wever, R.A.; Wildgruber, C.; Wright, J.	Whether or not the pineal gland has a significant physiological role in humans is not known. There has nevertheless been speculation about the potential therapeutic use of melatonin (in view of its hypnotic and possible zeitgeber properties) in conditions such as insomnia and jet lag, and in shift-workers. Our work concerns the effects of melatonin administration in humans and the interactions be…		melatonin; article; blood; circadian rhythm; drug effect; human; periodicity; physiology; pineal body; season; social isolation; Circadian Rhythm; Human; Melatonin; Periodicity; Pineal Gland; Seasons; Social Isolation; Support, Non-U.S. Gov't		melatonin, 73-31-4; Melatonin, 73-31-4							Arendt, J.								3005208			3836818	English	Ciba Found Symp	Article	Final		Scopus	2-s2.0-0022199642	1985_Arendt_Some	1985_Arendt_Some.pdf	https://sci-hub.se/10.1002/9780470720981.ch16	?
Iuvone P.M., Besharse J.C.	55667111200;7004828252;	Regulation of indoleamine N-Acetyltransferase activity in the retina: Effects of light and dark, protein synthesis inhibitors and cyclic nucleotide analogs	1983	Brain Research	273	1		111	119		107	10.1016/0006-8993(83)91099-5	https://www.scopus.com/inward/record.uri?eid=2-s2.0-0020512096&doi=10.1016%2f0006-8993%2883%2991099-5&partnerID=40&md5=4765872d733b9398d76418613e8ab635	Departments of Pharmacology, Anatomy, and Ophthalmology, Emory University School of Medicine, Atlanta, GA 30322, United States	Iuvone, P.M., Departments of Pharmacology, Anatomy, and Ophthalmology, Emory University School of Medicine, Atlanta, GA 30322, United States; Besharse, J.C., Departments of Pharmacology, Anatomy, and Ophthalmology, Emory University School of Medicine, Atlanta, GA 30322, United States	The regulation of indoleamine N-acetyltransferase (NAT) in the posterior eye was investigated in vivo, and in vitro in cultured eye cups. Surgical separation of neural retinal from the retinal pigment epithelium-choroid complex indicated that NAT was localized to neural retina. The activity of retinal NAT fluctuated in vivo in a rhythmic fashion, with peak activity in the dark phase of the light-…	melatonin; N-acetyltransferase; retina	8 bromo cyclic amp; bucladesine; cycloheximide; puromycin; animal cell; choroid; circadian rhythm; drug efficacy; frog; indoleamine n acetyltransferase; nonhuman; photoperiodicity; pigment epithelium; protein synthesis; retina; retina nerve cell; visual system; Acetyltransferases; Animal; Arylamine N-Acetyltransferase; Bucladesine; Circadian Rhythm; Comparative Study; Cycloheximide; Enzyme Induct…		8 bromo cyclic AMP, 23583-48-4; bucladesine, 16980-89-5, 362-74-3; cycloheximide, 642-81-9, 66-81-9; puromycin, 53-79-2, 58-58-2; Acetyltransferases, EC 2.3.1.; Arylamine N-Acetyltransferase, EC 2.3.1.5; Bucladesine, 362-74-3; Cycloheximide, 66-81-9; Melatonin, 73-31-4; Puromycin, 53-79-2							Iuvone, P.M.; Departments of Pharmacology, Anatomy, and Ophthalmology, Emory University School of Medicine, Atlanta, GA 30322, United States								68993		BRREA	6311344	English	Brain Res.	Article	Final		Scopus	2-s2.0-0020512096	1983_Iuvone_Regulation	1983_Iuvone_Regulation.pdf	https://sci-hub.se/10.1016/0006-8993(83)91099-5	Y
Poon A.M.S., Liu Z.M., Pang C.S., Brown G.M.	7103068868;57201597949;7201425191;35493704500;	Evidence for a direct action of melatonin on the immune system	1994	NeuroSignals	3	2		107	117		106	10.1159/000109532	https://www.scopus.com/inward/record.uri?eid=2-s2.0-84940139813&doi=10.1159%2f000109532&partnerID=40&md5=2e6dc0c4254b2aee38e87703ba1a1646	Department of Physiology, University of Hong Kong, Hong Kong; The Clarke Institute of Psychiatry, Toronto, Canada	Poon, A.M.S., Department of Physiology, University of Hong Kong, Hong Kong; Liu, Z.M., Department of Physiology, University of Hong Kong, Hong Kong; Pang, C.S., Department of Physiology, University of Hong Kong, Hong Kong, The Clarke Institute of Psychiatry, Toronto, Canada; Brown, G.M., The Clarke Institute of Psychiatry, Toronto, Canada	Pineal melatonin modulates the mammalian immune system. In vivo studies showed that melatonin enhanced the natural and acquired immunity while in vitro studies demonstrated its inhibitory influence. The mechanism of melatonin action on the immune system remains unknown. Actions through lymphokines or opioid release or via other endocrine changes have been proposed. In this paper, a direct action …	(l25I]Iodomelatonin binding; 2-; Bursa; Diumal rhythm; Guanine nucleotide-binding protein; Lymphocytes; Melatonin receptors; Pineal gland; Spleen; Thymus	melatonin; melatonin receptor; animal tissue; bird; circadian rhythm; immune system; lymphocyte; mammal; nonhuman; pineal body; review; thymus; Animal; Birds; Comparative Study; GTP-Binding Proteins; Human; Immune System; Immunosuppressive Agents; Lymphoid Tissue; Mammals; Melatonin; Neuroimmunomodulation; Neurotransmitters; Receptors, Cell Surface; Signal Transduction; Species Specificity		melatonin, 73-31-4; 2-iodomelatonin, 93515-00-5; GTP-Binding Proteins, EC 3.6.1.-; Immunosuppressive Agents; melatonin receptors; Melatonin, 73-31-4; Neurotransmitters; Receptors, Cell Surface							Poon, A.M.S.; Department of Physiology, University of Hong Kong, Li Shu Fan Building, Sassoon Road, Hong Kong								1424862X			7951648	English	Neurosignals	Article	Final		Scopus	2-s2.0-84940139813	1994_Poon_Evidence	1994_Poon_Evidence.pdf	https://sci-hub.se/10.1159/000109532	Y
Wright H.R., Lack L.C., Kennaway D.J.	7202463101;34467711900;7005386876;	Differential effects of light wavelength in phase advancing the melatonin rhythm	2004	Journal of Pineal Research	36	2		140	144		105	10.1046/j.1600-079X.2003.00108.x	https://www.scopus.com/inward/record.uri?eid=2-s2.0-1342343942&doi=10.1046%2fj.1600-079X.2003.00108.x&partnerID=40&md5=8cc5db1cd42a67a7de47ae4c029ec7c0	School of Psychology, Flinders University, Adelaide, SA, Australia; Dept. of Obstetrics and Gynaecology, University of Adelaide, Adelaide, SA, Australia; School of Psychology, Flinders University, GPO Box 2100, Adelaide, SA 5001, Australia	Wright, H.R., School of Psychology, Flinders University, Adelaide, SA, Australia; Lack, L.C., School of Psychology, Flinders University, Adelaide, SA, Australia, School of Psychology, Flinders University, GPO Box 2100, Adelaide, SA 5001, Australia; Kennaway, D.J., Dept. of Obstetrics and Gynaecology, University of Adelaide, Adelaide, SA, Australia	Shorter wavelength light has been shown to be more effective than longer wavelengths in suppressing nocturnal melatonin and phase delaying the melatonin rhythm. In the present study, different wavelengths of light were evaluated for their capacity to phase advance the saliva melatonin rhythm. Two long wavelengths, 595 nm (amber) and 660 nm (red) and three shorter wavelengths, 470 nm (blue), 497 n…	Circadian rhythm; Light wavelength; Light-emitting diodes; Melatonin; Phase advance	amber; melatonin; adult; article; circadian rhythm; color; diode; female; human; human experiment; light; male; normal human; salivation; spectral sensitivity; spectrum; volunteer; white light; Adult; Circadian Rhythm; Dose-Response Relationship, Drug; Female; Humans; Lighting; Male; Melatonin; Saliva; Time Factors		amber, 9000-02-6; melatonin, 73-31-4; Melatonin, 73-31-4							Lack, L.C.; School of Psychology, Flinders University, GPO Box 2100, Adelaide, SA 5001, Australia; email: leon.lack@flinders.edu.au								7423098		JPRSE	14962066	English	J. Pineal Res.	Article	Final		Scopus	2-s2.0-1342343942	2004_Wright_Differential	2004_Wright_Differential.pdf	https://sci-hub.se/10.1046/j.1600-079X.2003.00108.x	Y
Tamarkin L., Reppert S.M., Orloff D.J., Klein D.C., Yellon S.M., Goldman B.D.	7003640553;7006606071;7004305245;7402360691;7006640939;7202465573;	Ontogeny of the pineal melatonin rhythm in the syrian (mesocricetus auratus) and siberian (phodopus sungorus) hamsters and in the rat	1980	Endocrinology	107	4		1061	1064		105	10.1210/endo-107-4-1061	https://www.scopus.com/inward/record.uri?eid=2-s2.0-0018933363&doi=10.1210%2fendo-107-4-1061&partnerID=40&md5=5f9231c9aa533992c772f29f0c3d5342	Section on Neuroendocrinology, National Institutes of Health, Laboratory of Developmental Neurobiology, National Institute of Child Health and Human Development, Bethesda, MD, 20205, United States; Department of Biobehavioral Sciences, University of Connecticut, Storrs, CT, 06268, United States	Tamarkin, L., Section on Neuroendocrinology, National Institutes of Health, Laboratory of Developmental Neurobiology, National Institute of Child Health and Human Development, Bethesda, MD, 20205, United States, Department of Biobehavioral Sciences, University of Connecticut, Storrs, CT, 06268, United States; Reppert, S.M., Section on Neuroendocrinology, National Institutes of Health, Laboratory …	The ontogeny of the pineal melatonin rhythm was determined in three rodent species. Pineal glands were obtained either during the day or during the expected peak in melatonin at night. In all species the rhythm was first detected during the second week of life. Investigations of the photic regulation of pineal melatonin revealed that light could inhibit the nocturnal increase in melatonin in all …		melatonin; animal experiment; central nervous system; endocrine system; ontogeny; pineal body; rat; theoretical study; Aging; Animals; Circadian Rhythm; Cricetinae; Female; Male; Melatonin; Mesocricetus; Pineal Gland; Rats; Species Specificity		melatonin, 73-31-4; Melatonin, 73-31-4							Tamarkin, L.; IRP, National Institute of Child Health and Human Development, National Institutes of Health, Building 6, Bethesda, MD, 20205, United States								137227			7408759	English	Endocrinology	Article	Final		Scopus	2-s2.0-0018933363	1980_Tamarkin_Ontogeny	1980_Tamarkin_Ontogeny.pdf	https://sci-hub.se/10.1210/endo-107-4-1061	Y
Ying S.-W., Rusak B., Delagrange P., Mocaër E., Renard P., Guardiola-Lemaître B.	36787271600;7006106608;7007022477;7004146035;57204256368;16942024600;	Melatonin analogues as agonists and antagonists in the circadian system and other brain areas	1996	European Journal of Pharmacology	296	1		33	42		104	10.1016/0014-2999(95)00684-2	https://www.scopus.com/inward/record.uri?eid=2-s2.0-0343408487&doi=10.1016%2f0014-2999%2895%2900684-2&partnerID=40&md5=cca8d826f1ef8216d5d6397f88a50d7e	Department of Psychology, Dalhousie University, Halifax, NS, Canada; Department of Pharmacology, Dalhousie University, Halifax, NS, Canada; Inst. de Rech. Intl. Servier, Courbevoie Cedex, France; Department of Psychology, Life Sciences Centre, Dalhousie University, Halifax, NS B3H 4J1, Canada	Ying, S.-W., Department of Psychology, Dalhousie University, Halifax, NS, Canada; Rusak, B., Department of Psychology, Dalhousie University, Halifax, NS, Canada, Department of Pharmacology, Dalhousie University, Halifax, NS, Canada, Department of Psychology, Life Sciences Centre, Dalhousie University, Halifax, NS B3H 4J1, Canada; Delagrange, P., Inst. de Rech. Intl. Servier, Courbevoie Cedex, Fra…	We studied the effects of drugs related to melatonin on neuronal firing activity in the suprachiasmatic nucleus, intergeniculate leaflet and other brain areas in urethane-anesthetized Syrian hamsters. We tested melatonin and two naphthalenic derivatives of melatonin, a putative agonist (S20098: N-[2-(7-methoxy-1-naphthyl)ethyl]acetamide), and a putative antagonist (S20928: N-[2-(1-naphthyl)ethyl]…	Circadian rhythm; Electrophysiology; Entrainment; Intergeniculate leaflet; Light; Melatonin; Suprachiasmatic nucleus	agomelatine; cs 20928; melatonin; melatonin derivative; melatonin receptor; melatonin receptor agonist; melatonin receptor antagonist; metergoline; n [2 (1 naphthyl)ethyl]cyclobutylcarboxamide; unclassified drug; animal experiment; article; brain region; circadian rhythm; controlled study; dose time effect relation; drug antagonism; electrophysiology; hippocampus; intracerebral drug administratio…		agomelatine, 138112-76-2; melatonin, 73-31-4; metergoline, 17692-51-2	cs 20928, Servier, France; s 20098, Servier, France	Servier, France; Farmitalia Carlo Erba, Italy; Sigma		This researchw as supportedb y IRIS, NSERC of Canada, and the U.S. AFOSR. We are grateful to Donna Goguena nd Victoria Muise for their excellent technicaal ssistance.			Rusak, B.; Department of Psychology, Life Sciences Centre, Dalhousie University, Halifax, NS B3H 4J1, Canada			Elsevier B.V.					142999		EJPHA	8720474	English	EUR. J. PHARMACOL.	Article	Final		Scopus	2-s2.0-0343408487	1996_Ying_Melatonin	1996_Ying_Melatonin.pdf	https://sci-hub.se/10.1016/0014-2999(95)00684-2	Y
Herljevic M., Middleton B., Thapan K., Skene D.J.	8267252400;7102750967;8267252200;21035951300;	Light-induced melatonin suppression: Age-related reduction in response to short wavelength light	2005	Experimental Gerontology	40	3		237	242		104	10.1016/j.exger.2004.12.001	https://www.scopus.com/inward/record.uri?eid=2-s2.0-14844302203&doi=10.1016%2fj.exger.2004.12.001&partnerID=40&md5=0f0cf7d8d794fd406ad0ac2689060cbc	Centre for Chronobiology, Sch. of Biomed. and Molec. Sciences, University of Surrey, Guildford, Surrey GU2 7XH, United Kingdom	Herljevic, M., Centre for Chronobiology, Sch. of Biomed. and Molec. Sciences, University of Surrey, Guildford, Surrey GU2 7XH, United Kingdom; Middleton, B., Centre for Chronobiology, Sch. of Biomed. and Molec. Sciences, University of Surrey, Guildford, Surrey GU2 7XH, United Kingdom; Thapan, K., Centre for Chronobiology, Sch. of Biomed. and Molec. Sciences, University of Surrey, Guildford, Surre…	One of the possible causes of disturbed circadian rhythms and sleep in the elderly may be impaired photic input to the circadian clock. Age-related changes in lens density are known to reduce the transmission of short wavelength light, which has been shown to be most effective in suppressing nocturnal melatonin. The aim of the study therefore was to investigate age-related changes in melatonin su…	Ageing; Melatonin suppression; Postmenopausal; Short wavelength light; Women	melatonin; adult; aging; article; circadian rhythm; controlled study; female; human; human experiment; irradiation; light exposure; normal human; postmenopause; premenopause; priority journal		melatonin, 73-31-4			QLK6-CT-2000-00499	We would like to thank Dr Victoria Revell and Ms Selvamalar Ratnasingam for all their help during the clinical trials. Special thanks also go to all the volunteers for their time and dedication to the project. This research was supported by an EU 5th Framework grant (QLK6-CT-2000-00499).			Skene, D.J.; Centre for Chronobiology, Sch. of Biomed. and Molec. Sciences, University of Surrey, Guildford, Surrey GU2 7XH, United Kingdom; email: d.skene@surrey.ac.uk			Elsevier Inc.					5315565		EXGEA	15763401	English	Exp. Gerontol.	Article	Final		Scopus	2-s2.0-14844302203	2005_Herljevic_Light-induced	2005_Herljevic_Light-induced.pdf	https://sci-hub.se/10.1016/j.exger.2004.12.001	Y
Revell V.L., Arendt J., Fogg L.F., Skene D.J.	8613504500;7101704924;7003418034;21035951300;	Alerting effects of light are sensitive to very short wavelengths	2006	Neuroscience Letters	399	2019-02-01		96	100		104	10.1016/j.neulet.2006.01.032	https://www.scopus.com/inward/record.uri?eid=2-s2.0-33646120811&doi=10.1016%2fj.neulet.2006.01.032&partnerID=40&md5=8eafc96680f170135c1f0568fe5c13cf	School of Biomedical and Molecular Sciences, University of Surrey, Guildford, Surrey GU2 7XH, United Kingdom; Biological Rhythms Research Laboratory, Department of Behavioral Sciences, Rush University Medical Center, Chicago, IL 60612, United States	Revell, V.L., School of Biomedical and Molecular Sciences, University of Surrey, Guildford, Surrey GU2 7XH, United Kingdom, Biological Rhythms Research Laboratory, Department of Behavioral Sciences, Rush University Medical Center, Chicago, IL 60612, United States; Arendt, J., School of Biomedical and Molecular Sciences, University of Surrey, Guildford, Surrey GU2 7XH, United Kingdom; Fogg, L.F., …	In humans a range of non-image-forming (NIF) light responses (melatonin suppression, phase shifting and alertness) are short wavelength sensitive (440-480 nm). The aim of the current study was to assess the acute effect of three different short wavelength light pulses (420, 440 and 470 nm) and 600 nm light on subjective alertness. Healthy male subjects (n = 12, aged 27 ± 4 years, mean ± S.D.) wer…	Alertness; Human; Light; Short wavelength light; Spectral sensitivity	adult; alertness; article; comparative study; controlled study; functional assessment; human; light; light exposure; male; mood change; normal human; photon; priority journal; retina cone; retina rod; spectral sensitivity; visual cortex; visual stimulation; Adult; Affect; Arousal; Humans; Light; Male					University of Surrey 018741	V.L.R was supported by a University of Surrey research scholarship. We wish to thank J. English, Dr. B. Middleton, Dr. M. Gibbs, Dr. L. Hack, M. Herljevic, Dr. K. Thapan, Dr. H. Tripp, Dr. D. Robilliard and Dr. G. Warman for all their assistance in running the clinical trials. The authors acknowledge support from Stockgrand Ltd. VLR and DJS are supported by the 6th Framework Project EUCLOCK (No. …			Revell, V.L.; School of Biomedical and Molecular Sciences, University of Surrey, Guildford, Surrey GU2 7XH, United Kingdom; email: Victoria_L_Revell@rush.edu								3043940		NELED	16490309	English	Neurosci. Lett.	Article	Final		Scopus	2-s2.0-33646120811	2006_Revell_Alerting	2006_Revell_Alerting.pdf	https://sci-hub.se/10.1016/j.neulet.2006.01.032	Y
Rawashdeh O., De Borsetti N.H., Roman G., Cahill G.M.	8558052900;23004486700;7103388929;7005277631;	Melatonin suppresses nighttime memory formation in zebrafish	2007	Science	318	5853		1144	1146		104	10.1126/science.1148564	https://www.scopus.com/inward/record.uri?eid=2-s2.0-36248954979&doi=10.1126%2fscience.1148564&partnerID=40&md5=42aae43711b869d0398496212c0b463d	Department of Biology and Biochemistry, University of Houston, 369 Science and Research II, Houston, TX 77204-5001, United States	Rawashdeh, O., Department of Biology and Biochemistry, University of Houston, 369 Science and Research II, Houston, TX 77204-5001, United States; De Borsetti, N.H., Department of Biology and Biochemistry, University of Houston, 369 Science and Research II, Houston, TX 77204-5001, United States; Roman, G., Department of Biology and Biochemistry, University of Houston, 369 Science and Research II, …	Memory processes are modulated by the biological clock, although the mechanisms are unknown. Here, we report that in the diurnal zebrafish both learning and memory formation of an operant conditioning paradigm occur better during the day than during the night. Melatonin treatment during the day mimics the nighttime suppression of memory formation. Training in constant light improves nighttime mem…		luzindole; melatonin; conditioning; cyprinid; diurnal activity; endogenous growth; light; memory; algorithm; article; circadian rhythm; diurnal animal; learning; locomotion; memory; nonhuman; pineal body; pinealectomy; priority journal; zebra fish; Animals; Circadian Rhythm; Darkness; Male; Melatonin; Memory; Zebrafish; Danio rerio		luzindole, 117946-91-5; melatonin, 73-31-4; Melatonin, 73-31-4							Roman, G.; Department of Biology and Biochemistry, University of Houston, 369 Science and Research II, Houston, TX 77204-5001, United States; email: gwroman@central.uh.edu								368075		SCIEA	18006748	English	Science	Article	Final		Scopus	2-s2.0-36248954979	2007_Rawashdeh_Melatonin	2007_Rawashdeh_Melatonin.pdf	https://sci-hub.se/10.1126/science.1148564	Y
Brainard G.C., Hanifin J.P., Rollag M.D., Greeson J., Byrne B., Glickman G., Gerner E., Sanford B.	7003540124;7102742786;7004476998;6603018311;8336699800;7003492763;8336699900;7003961702;	Human melatonin regulation is not mediated by the three cone photopic visual system	2001	Journal of Clinical Endocrinology and Metabolism	86	1		433	436		103	10.1210/jcem.86.1.7277	https://www.scopus.com/inward/record.uri?eid=2-s2.0-0035140378&doi=10.1210%2fjcem.86.1.7277&partnerID=40&md5=fe8c7e0eae1ca8001b157b104ca3d7ec	Department of Neurology, Jefferson Medical College, 1025 Walnut Street, Philadelphia, PA 19107, United States	Brainard, G.C., Department of Neurology, Jefferson Medical College, 1025 Walnut Street, Philadelphia, PA 19107, United States, ; Hanifin, J.P., Department of Neurology, Jefferson Medical College, 1025 Walnut Street, Philadelphia, PA 19107, United States, ; Rollag, M.D., Department of Neurology, Jefferson Medical College, 1025 Walnut Street, Philadelphia, PA 19107, United States, ; Greeson, J., De…	The aim of this study was to test if the three cone photopic visual system is the primary ocular photoreceptor input for human circadian regulation by determining the effects of different wavelengths on light-induced melatonin suppression. Healthy subjects with stable sleeping patterns (wake-up time 7:30 AM ± 12 min) and normal color vision were exposed at night to full-field 505 nm or 555 nm mon…		melatonin; adult; article; circadian rhythm; color vision; controlled study; darkness; female; hormonal regulation; hormone inhibition; human; human experiment; irradiation; light exposure; male; night; normal human; priority journal; retina cone; sleep pattern; stimulus response; visual stimulation; visual system; waveform		melatonin, 73-31-4							Brainard, G.C.; Department of Neurology, Jefferson Medical College, 1025 Walnut Street, Philadelphia, PA 19107, United States			Endocrine Society					0021972X		JCEMA	11232036	English	J. Clin. Endocrinol. Metab.	Article	Final	Open Access	Scopus	2-s2.0-0035140378	2001_Brainard_Human	2001_Brainard_Human.pdf	https://sci-hub.se/10.1210/jcem.86.1.7277	Y
Ebihara S., Uchiyama K., Oshima I.	56496474600;16475047300;7005703203;	Circadian organization in the pigeon, Columba livia: the role of the pineal organ and the eye	1984	Journal of Comparative Physiology A	154	1		59	69		102	10.1007/BF00605391	https://www.scopus.com/inward/record.uri?eid=2-s2.0-0002597556&doi=10.1007%2fBF00605391&partnerID=40&md5=0e533b22d360b843f8b9f57f8f9c206f	Department of Animal Physiology, Faculty of Agriculture, Nagoya University, Chikusa-ku, Nagoya, 464, Japan	Ebihara, S., Department of Animal Physiology, Faculty of Agriculture, Nagoya University, Chikusa-ku, Nagoya, 464, Japan; Uchiyama, K., Department of Animal Physiology, Faculty of Agriculture, Nagoya University, Chikusa-ku, Nagoya, 464, Japan; Oshima, I., Department of Animal Physiology, Faculty of Agriculture, Nagoya University, Chikusa-ku, Nagoya, 464, Japan	The roles of the pineal organ and the eye in the control of circadian locomotor rhythmicity were studied in the pigeon (Columba livia). Neither pinealectomy nor blinding abolished the circadian rhythms in constant dim light conditions (LLdim). All the pinealectomized birds and the blinded birds entrained to light-dark (LD) cycles with no discernible anticipatory activity. However, the birds which…											Ebihara, S.; Department of Animal Physiology, Faculty of Agriculture, Nagoya University, Chikusa-ku, Nagoya, 464, Japan			Springer-Verlag					3407594		JCPAD		English	J. Comp. Physiol.	Article	Final		Scopus	2-s2.0-0002597556	1984_Ebihara_Circadian	1984_Ebihara_Circadian.pdf	https://sci-hub.se/10.1007/BF00605391	Y
Klerman E.B., Shanahan T.L., Brotman D.J., Rimmer D.W., Emens J.S., Rizzo III J.F., Czeisler C.A.	6701750101;7006153552;7004189042;7005223287;6603612337;7103216592;7006224092;	Photic resetting of the human circadian pacemaker in the absence of conscious vision	2002	Journal of Biological Rhythms	17	6		548	555		102	10.1177/0748730402238237	https://www.scopus.com/inward/record.uri?eid=2-s2.0-0037656048&doi=10.1177%2f0748730402238237&partnerID=40&md5=3df9952c137b458b8bde34bb660cda09	Department of Medicine, Brigham and Women's Hospital, Harvard Medical School, Boston, MA 02115, United States; Neuroophthalmology Unit, Massachusetts Eye and Ear Infirmary, Boston, MA 02114, United States; Division of Sleep Medicine, Brigham and Women's Hospital, 221 Longwood Avenue, Boston, MA 02115, United States	Klerman, E.B., Department of Medicine, Brigham and Women's Hospital, Harvard Medical School, Boston, MA 02115, United States, Division of Sleep Medicine, Brigham and Women's Hospital, 221 Longwood Avenue, Boston, MA 02115, United States; Shanahan, T.L., Department of Medicine, Brigham and Women's Hospital, Harvard Medical School, Boston, MA 02115, United States; Brotman, D.J., Department of Medic…	Ocular light exposure patterns are the primary stimuli for entraining the human circadian system to the local 24-h day. Many totally blind persons cannot use these stimuli and, therefore, have circadian rhythms that are not entrained. However, a few otherwise totally blind persons retain the ability to suppress plasma melatonin concentrations after ocular light exposure, probably using a neural p…	Blind; Circadian; Human; Melatonin; Phase shift; Photic	melatonin; adult; aged; amplitude modulation; article; circadian rhythm; clinical article; consciousness; female; human; light dark cycle; light exposure; male; oscillation; pacemaker; photostimulation; pupil reflex; retina ganglion cell; stimulus response; vision; visual stimulation; Non-programmatic; Adult; Aged; Blindness; Circadian Rhythm; Female; Humans; Light; Male; Melatonin; Middle Aged; …		melatonin, 73-31-4; Melatonin, 73-31-4							Klerman, E.B.; Division of Sleep Medicine, Brigham and Women's Hospital, 221 Longwood Avenue, Boston, MA 02115, United States; email: ebklerman@hms.harvard.edu								7487304		JBRHE	12465888	English	J. Biol. Rhythms	Article	Final		Scopus	2-s2.0-0037656048	2002_Klerman_Photic	2002_Klerman_Photic.pdf	https://sci-hub.se/10.1177/0748730402238237	Y
McArthur A.J., Lewy A.J., Sack R.L.	7005534794;7004848014;7102549707;	Non-24-hour sleep-wake syndrome in a sighted man: Circadian rhythm studies and efficacy of melatonin treatment	1996	Sleep	19	7		544	553		101	10.1093/sleep/19.7.544	https://www.scopus.com/inward/record.uri?eid=2-s2.0-0029797433&doi=10.1093%2fsleep%2f19.7.544&partnerID=40&md5=6340fa6654fb29c1fb6ab252fbae3b08	Sleep and Mood Disorders Laboratory, Department of Psychiatry, Oregon Health Sciences University, Portland, OR, United States; Department of Psychiatry, L-469, Oregon Health Sciences University, Portland, OR 97201, United States	McArthur, A.J., Sleep and Mood Disorders Laboratory, Department of Psychiatry, Oregon Health Sciences University, Portland, OR, United States; Lewy, A.J., Sleep and Mood Disorders Laboratory, Department of Psychiatry, Oregon Health Sciences University, Portland, OR, United States; Sack, R.L., Sleep and Mood Disorders Laboratory, Department of Psychiatry, Oregon Health Sciences University, Portlan…	The case of a 41-year-old sighted man with non-24 hour sleep wake syndrome is presented. A 7-week baseline assessment confirmed thai the patient expressed endogenous melatonin and sleep-wake rhythms with a period of 25.1 hours. We sought to investigate the underlying pathology and to entrain the patient to a normal sleep-wake schedule. No deficiency in melatonin synthesis was found. Furthermore, …	Entrainment; Light suppression; Melatonin; Non-24-hour sleep-wake syndrome	melatonin; adult; article; case report; circadian rhythm; hormone release; human; light exposure; male; oral drug administration; priority journal; sleep waking cycle; syndrome		melatonin, 73-31-4		Regis					Sack, R.L.; Department of Psychiatry, Oregon Health Sciences University, Portland, OR 97201, United States			Associated Professional Sleep Societies,LLC					1618105		SLEED	8899933	English	SLEEP	Article	Final	Open Access	Scopus	2-s2.0-0029797433	1996_McArthur_Non-24-hour	1996_McArthur_Non-24-hour.pdf	https://sci-hub.se/10.1093/sleep/19.7.544	Y
Duncan M.J., Goldman B.D., Di Pinto M.N., Stetson M.H.	57203255937;7202465573;6506877114;7005823952;	Testicular function and pelage color have different critical daylengths in the djungarian hamster, Phodopus sungorus sungorus	1985	Endocrinology	116	1		424	430		101	10.1210/endo-116-1-424	https://www.scopus.com/inward/record.uri?eid=2-s2.0-0021925555&doi=10.1210%2fendo-116-1-424&partnerID=40&md5=7645de2217d19c3ecb66f4918b9cda1b	Worcester Foundation for Experimental Biology, Shrewsbury, MA, 01545, United States; Physiology Section, University of Delaware School of Life and Health Sciences, Newark, DE, 19716, United States; Children’s Service, Massachusetts General Hospital, Fruit Street, Boston, MA, 02114, United States	Duncan, M.J., Worcester Foundation for Experimental Biology, Shrewsbury, MA, 01545, United States, Children’s Service, Massachusetts General Hospital, Fruit Street, Boston, MA, 02114, United States; Goldman, B.D., Worcester Foundation for Experimental Biology, Shrewsbury, MA, 01545, United States; Di Pinto, M.N., Physiology Section, University of Delaware School of Life and Health Sciences, Newar…	Testicular function and pelage color are regulated by photoperiod in the Djungarian hamster. To investigate the critical daylengths of these functions, adult male hamsters were exposed to one of four photoperiods: 16 h of light, 8 h of darkness (16L: 8D), 14L: 10D, 12L: 12D, or 10L: 14D. 10L: 14D and 12L: 12D induced the winter molt and testicular regression, in contrast to 14L: 10D which induced…		follitropin; melatonin; prolactin; radioisotope; animal experiment; circadian rhythm; endocrine system; hair color; light adaptation; male genital system; nonhuman; photoperiodicity; priority journal; testis; Animal; Body Weight; Castration; Follicle Stimulating Hormone; Hair Color; Hamsters; Light; Male; Melatonin; Organ Weight; Periodicity; Prolactin; Support, U.S. Gov't, Non-P.H.S.; Support, U…		follitropin, 9002-68-0; melatonin, 73-31-4; prolactin, 12585-34-1, 50647-00-2, 9002-62-4; Follicle Stimulating Hormone, 9002-68-0; Melatonin, 73-31-4; Prolactin, 9002-62-4							Goldman, B.D.; Worcester Foundation for Experimenal Biology, 222 Maple Avenue, Shrewsbury, MA, 01545, United States								137227			3917252	English	Endocrinology	Article	Final		Scopus	2-s2.0-0021925555	1985_Duncan_Testicular	1985_Duncan_Testicular.pdf	https://sci-hub.se/10.1210/endo-116-1-424	Y
Bittman E.L., Kaynard A.H., Olster D.H., Robinson J.E., Yellon S.M., Karsch F.J.	7004662497;6701562790;35885113300;35799000200;7006640939;7101883690;	Pineal melatonin mediates photoperiodic control of pulsatile luteinizing hormone secretion in the ewe	1985	Neuroendocrinology	40	5		409	418		99	10.1159/000124106	https://www.scopus.com/inward/record.uri?eid=2-s2.0-0021999504&doi=10.1159%2f000124106&partnerID=40&md5=571bcc2815ff50a85ca260112c188ad9	Reproductive Endocrinology Program and Department of Physiology, The University of Michigan, Ann Arbor, MI, United States	Bittman, E.L., Reproductive Endocrinology Program and Department of Physiology, The University of Michigan, Ann Arbor, MI, United States; Kaynard, A.H., Reproductive Endocrinology Program and Department of Physiology, The University of Michigan, Ann Arbor, MI, United States; Olster, D.H., Reproductive Endocrinology Program and Department of Physiology, The University of Michigan, Ann Arbor, MI, U…	Seasonal breeding in the ewe is regulated by photoperiod through a pineal-dependent mechanism. Changes in the ability of estradiol to inhibit tonic LH secretion are critical. During anestrus, this ovarian steroid gains the ability to slow the frequency of pulsatile LH secretion through an action on the brain. Exposure of ovariectomized, estradiol-implanted ewes to short photoperiods during summer…	Ewe; Gonadotropin releasing hormone (GnRH); LH pulses; Melatonin; Photoperiod; Pineal gland; Seasonal breeding	estradiol; gonadorelin; luteinizing hormone; melatonin; animal experiment; breeding; central nervous system; drug efficacy; endocrine system; hypophysis; nonhuman; pineal body; priority journal; season; sheep; Animals; Castration; Estradiol; Female; Gonadotropin-Releasing Hormone; Light; Luteinizing Hormone; Melatonin; Periodicity; Pineal Gland; Reproduction; Seasons; Sheep		estradiol, 50-28-2; gonadorelin, 33515-09-2, 9034-40-6; luteinizing hormone, 39341-83-8, 9002-67-9; melatonin, 73-31-4; Estradiol, 50-28-2; Gonadotropin-Releasing Hormone, 33515-09-2; Luteinizing Hormone, 9002-67-9; Melatonin, 73-31-4		boehringer mannheim													283835			3892351	English	Neuroendocrinology	Article	Final		Scopus	2-s2.0-0021999504	1985_Bittman_Pineal	1985_Bittman_Pineal.pdf	https://sci-hub.se/10.1159/000124106	Y
Strassman R.J., Qualls C.R., Lisansky E.J., Peake G.T.	6603879300;35494568200;6603553646;24557197400;	Elevated rectal temperature produced by all-night bright light is reversed by melatonin infusion in men	1991	Journal of Applied Physiology	71	6		2178	2182		99	10.1152/jappl.1991.71.6.2178	https://www.scopus.com/inward/record.uri?eid=2-s2.0-0026320937&partnerID=40&md5=00dce328eb9bf0478cd09be9f69eada7	Dept. of Psychiatry, University of New Mexico, School of Medicine, 2400 Tucker, NE, Albuquerque, NM 87131, United States	Strassman, R.J., Dept. of Psychiatry, University of New Mexico, School of Medicine, 2400 Tucker, NE, Albuquerque, NM 87131, United States; Qualls, C.R., Dept. of Psychiatry, University of New Mexico, School of Medicine, 2400 Tucker, NE, Albuquerque, NM 87131, United States; Lisansky, E.J., Dept. of Psychiatry, University of New Mexico, School of Medicine, 2400 Tucker, NE, Albuquerque, NM 87131, U…	Early morning rectal body temperature is lowest when melatonin levels are highest in humans. Although pharmacological doses of melatonin are hypothermic in humans, the relationship between endogenous melatonin and temperature level has not been investigated. We measured rectal body temperature in nine normal men whose melatonin levels were suppressed by all- night sleep deprivation in bright ligh…	circadian rhythms; pineal body; sleep deprivation; temperature regulation	melatonin; adult; article; brightness; circadian rhythm; controlled study; darkness; hormone blood level; hormone substitution; human; human experiment; light; male; neuroendocrine system; normal human; priority journal; rectum temperature; sleep deprivation; thermoregulation; Adult; Body Temperature; Circadian Rhythm; Darkness; Human; Light; Male; Melatonin; Sleep Deprivation; Support, Non-U.S. …		melatonin, 73-31-4; Melatonin, 73-31-4							Strassman, R.J.; Dept. of Psychiatry, University of New Mexico, School of Medicine, 2400 Tucker, NE, Albuquerque, NM 87131, United States								1617567		JAPHE	1778910	English	J. APPL. PHYSIOL.	Article	Final		Scopus	2-s2.0-0026320937	1991_Strassman_Elevated	1991_Strassman_Elevated.pdf	https://sci-hub.se/10.1152/jappl.1991.71.6.2178	Y
Rosenthal N.E., Sack D.A., Jacobsen F.M., James S.P., Parry B.L., Arendt J., Tamarkin L., Wehr T.A.	7102033351;24397819900;7102473867;7402533215;7102441431;7101704924;7003640553;7004768783;	Melatonin in seasonal affective disorder and phototherapy.	1986	Journal of neural transmission. Supplementum	21			257	267		98		https://www.scopus.com/inward/record.uri?eid=2-s2.0-0022438454&partnerID=40&md5=b6bd4d2b2b08bb344779b36e9580052c		Rosenthal, N.E.; Sack, D.A.; Jacobsen, F.M.; James, S.P.; Parry, B.L.; Arendt, J.; Tamarkin, L.; Wehr, T.A.	In several studies we have found that treatment with bright environmental light, capable of suppressing human melatonin, reverses the winter depressive symptoms of patients with seasonal affective disorder (SAD), whereas light too dim to suppress human melatonin is therapeutically ineffective. This finding, as well as the central importance of melatonin as a hormonal mediator of photoperiodic cha…		melatonin; animal; article; circadian rhythm; clinical trial; controlled study; drug effect; human; light; mood disorder; pathophysiology; phototherapy; physiology; pineal body; season; Animal; Circadian Rhythm; Human; Light; Melatonin; Mood Disorders; Phototherapy; Pineal Gland; Seasons		melatonin, 73-31-4; Melatonin, 73-31-4							Rosenthal, N.E.								3036995			3462335	English	J Neural Transm Suppl	Article	Final		Scopus	2-s2.0-0022438454	1986_Rosenthal_Melatonin	1986_Rosenthal_Melatonin.pdf	https://sci-hub.se/	?
Zachmann A., Falcon J., Knijff S.C.M., Bolliet V., Ali M.A.	6506256823;35596083100;6507532500;57109238200;35598706900;	Effects of photoperiod and temperature on rhythmic melatonin secretion from the pineal organ of the white sucker (Catostomus commersoni) in vitro	1992	General and Comparative Endocrinology	86	1		26	33		96	10.1016/0016-6480(92)90122-Z	https://www.scopus.com/inward/record.uri?eid=2-s2.0-0026589101&doi=10.1016%2f0016-6480%2892%2990122-Z&partnerID=40&md5=a26acaf67a6ea1b129746e8cc6619fbf	Département de Biologie, Université de Montréal, C.P. 6128, Succ. A, Montréal, Québec, Canada H3C 3J7; Laboratoire de Biologie Cellulair, URA CNRS 290, UFR Sciences, 86022 Poitiers Cédex, France	Zachmann, A., Département de Biologie, Université de Montréal, C.P. 6128, Succ. A, Montréal, Québec, Canada H3C 3J7; Falcon, J., Laboratoire de Biologie Cellulair, URA CNRS 290, UFR Sciences, 86022 Poitiers Cédex, France; Knijff, S.C.M., Département de Biologie, Université de Montréal, C.P. 6128, Succ. A, Montréal, Québec, Canada H3C 3J7; Bolliet, V., Département de Biologie, Université de Montré…	The secretion rate of melatonin from cultured pineal organs of the white sucker was examined for several days under either a 12:12-hr light:dark (LD) cycle or continuous darkness (DD) at either 10° or 20°. The incubation medium was changed at 3-hr intervals and secreted melatonin was measured by RIA. Under a 12:12-hr LD cycle (0800 light on, 2000 light off) melatonin secretion was suppressed duri…		melatonin; animal tissue; article; circadian rhythm; fish; hormone release; hormone synthesis; light dark cycle; nonhuman; organ culture; photoperiodicity; pineal body; priority journal; radioimmunoassay; temperature; Animal; Circadian Rhythm; Fishes; Light; Melatonin; Organ Culture; Periodicity; Pineal Gland; Support, Non-U.S. Gov't; Temperature		melatonin, 73-31-4; Melatonin, 73-31-4			Natural Sciences and Engineering Research Council of Canada Foundation for Community Association Research	The authors thank Dr. M. Anctil and Dr. K. Rascher for critically reading the manuscript and Mrs. G. Ali for technical support. We thank Mr. F.-J. Lapointe for helpful advice on statistical problems. This study was supported by NSERC and FCAR, Quebec.			Zachmann, A.								166480		GCENA	1505727	English	Gen. Comp. Endocrinol.	Article	Final		Scopus	2-s2.0-0026589101	1992_Zachmann_Effects	1992_Zachmann_Effects.pdf	https://sci-hub.se/10.1016/0016-6480(92)90122-Z	Y
Münch M., Kobialka S., Steiner R., Oelhafen P., Wirz-Justice A., Cajochen C.	8986126800;8268598800;57197492489;57204296589;7005425500;7003530216;	Wavelength-dependent effects of evening light exposure on sleep architecture and sleep EEG power density in men	2006	American Journal of Physiology - Regulatory Integrative and Comparative Physiology	290	5		R1421	R1428		96	10.1152/ajpregu.00478.2005	https://www.scopus.com/inward/record.uri?eid=2-s2.0-33646469373&doi=10.1152%2fajpregu.00478.2005&partnerID=40&md5=86c7a07b3fcb6dc949a7648ea151bc2a	Centre for Chronobiology, Psychiatric University Clinics, Basel, Switzerland; Institute of Physics, University of Basel, Basel, Switzerland; Centre for Chronobiology, Psychiatric Univ. Clinics, Wilhelm Klein-Strasse 27, CH-4025 Basel, Switzerland	Münch, M., Centre for Chronobiology, Psychiatric University Clinics, Basel, Switzerland; Kobialka, S., Centre for Chronobiology, Psychiatric University Clinics, Basel, Switzerland; Steiner, R., Institute of Physics, University of Basel, Basel, Switzerland; Oelhafen, P., Institute of Physics, University of Basel, Basel, Switzerland; Wirz-Justice, A., Centre for Chronobiology, Psychiatric Universit…	Light strongly influences the circadian timing system in humans via non-image-forming photoreceptors in the retinal ganglion cells. Their spectral sensitivity is highest in the short-wavelength range of the visible light spectrum as demonstrated by melatonin suppression, circadian phase shifting, acute physiological responses, and subjective alertness. We tested the impact of short wavelength lig…	Monochromatic light; Non-image-forming visual system; Sleep electroencephalogram; Spectral analysis	adult; article; blue light; circadian rhythm; controlled study; core temperature; darkness; density; electroencephalography; human; human experiment; light exposure; light intensity; male; night; normal human; occipital lobe; parietal lobe; photon; photopic vision; power spectrum; priority journal; REM sleep; sleep; sleep pattern; sleep stage; sleep time; slow wave sleep; Adult; Darkness; Electro…									Cajochen, C.; Centre for Chronobiology, Psychiatric Univ. Clinics, Wilhelm Klein-Strasse 27, CH-4025 Basel, Switzerland; email: christian.cajochen@unibas.ch								3636119		AJPRD	16439671	English	Am. J. Physiol. Regul. Integr. Comp. Physiol.	Article	Final		Scopus	2-s2.0-33646469373	2006_Münch_Wavelength-dependent	2006_Münch_Wavelength-dependent.pdf	https://sci-hub.se/10.1152/ajpregu.00478.2005	Y
Paus S., Schmitz-Hübsch T., Wüllner U., Vogel A., Klockgether T., Abele M.	6602746189;13612891500;7007062470;7102617946;26643063400;7004740380;	Bright light therapy in Parkinson's disease: A pilot study	2007	Movement Disorders	22	10		1495	1498		95	10.1002/mds.21542	https://www.scopus.com/inward/record.uri?eid=2-s2.0-34548026072&doi=10.1002%2fmds.21542&partnerID=40&md5=1ea324449d007953b9024a6c9d02908c	Department of Neurology, University of Bonn, Bonn, Germany; Department of Ophthalmology, University of Bonn, Bonn, Germany; Department of Neurology, University of Bonn, Sigmund-Freud-Straße 25, Bonn 53105, Germany	Paus, S., Department of Neurology, University of Bonn, Bonn, Germany, Department of Neurology, University of Bonn, Sigmund-Freud-Straße 25, Bonn 53105, Germany; Schmitz-Hübsch, T., Department of Neurology, University of Bonn, Bonn, Germany; Wüllner, U., Department of Neurology, University of Bonn, Bonn, Germany; Vogel, A., Department of Ophthalmology, University of Bonn, Bonn, Germany; Klockgethe…	Several observations suggest a beneficial effect of melatonin antagonism for Parkinson's disease (PD). Although bright light therapy (BLT) suppresses melatonin release and is an established treatment for depression and sleep disturbances, it has not been evaluated in PD. We examined effects of BLT on motor symptoms, depression, and sleep in PD in a randomized placebo-controlled double-blind study…	Bright light therapy; Depression; Melatonin; Parkinson's disease; Tremor	placebo; adult; article; Beck Depression Inventory; bright light therapy; clinical article; clinical trial; controlled clinical trial; controlled study; depression; Epworth sleepiness scale; female; human; illumination; male; Parkinson disease; phototherapy; pilot study; priority journal; randomized controlled trial; sleep disorder; treatment duration; treatment outcome; Unified Parkinson Disease…									Paus, S.; Department of Neurology, University of Bonn, Sigmund-Freud-Straße 25, Bonn 53105, Germany; email: spaus@uni-bonn.de								8853185		MOVDE	17516492	English	Mov. Disord.	Article	Final		Scopus	2-s2.0-34548026072	2007_Paus_Bright	2007_Paus_Bright.pdf	https://sci-hub.se/10.1002/mds.21542	Y
Aoki H., Ozeki Y., Yamada N.	7402574489;7103381979;56808088100;	Hypersensitivity of melatonin suppression in response to light in patients with delayed sleep phase syndrome	2001	Chronobiology International	18	2		263	271		95	10.1081/CBI-100103190	https://www.scopus.com/inward/record.uri?eid=2-s2.0-0035026037&doi=10.1081%2fCBI-100103190&partnerID=40&md5=fd046bb2aaf1744e344bf37f2a0a5e91	Department of Psychiatry, Shiga University of Medical Science, Otsu, Shiga 520-2192, Japan	Aoki, H., Department of Psychiatry, Shiga University of Medical Science, Otsu, Shiga 520-2192, Japan; Ozeki, Y., Department of Psychiatry, Shiga University of Medical Science, Otsu, Shiga 520-2192, Japan; Yamada, N., Department of Psychiatry, Shiga University of Medical Science, Otsu, Shiga 520-2192, Japan	Patients with delayed sleep phase syndrome (DSPS) experience a chronic mismatch between the usual daily schedule required by the individual's environment and their circadian sleep-wake pattern, resulting in major academic, work, and social problems. Although functional abnormalities of the circadian pacemaker system have been reported in patients with DSPS, the etiology of DSPS has not been fully…	Delayed sleep phase syndrome; Hypersensitivity; Light; Light-induced melatonin suppression; Melatonin	melatonin; adolescent; adult; article; circadian rhythm; clinical article; controlled study; delayed sleep phase syndrome; environmental factor; female; hormone release; human; light dark cycle; light exposure; male; pacemaker; radioimmunoassay; saliva level; sleep disorder; sleep waking cycle; time; Adolescent; Adult; Case-Control Studies; Circadian Rhythm; Female; Humans; Light; Male; Melatonin…		Melatonin, 73-31-4			Japan Science and Technology Agency	This study was supported by a grant from the UNIVERS foundation and the Japanese Science and Technology Agency.			Aoki, H.; Department of Psychiatry, Shiga University of Medical Science, Otsu, Shiga 520-2192, Japan; email: haru@belle.shiga-med.ac.jp								7420528		CHBIE	11379666	English	Chronobiol. Int.	Article	Final		Scopus	2-s2.0-0035026037	2001_Aoki_Hypersensitivity	2001_Aoki_Hypersensitivity.pdf	https://sci-hub.se/10.1081/CBI-100103190	Y
Yellon S.M.	7006640939;	Acute 60 Hz magnetic field exposure effects on the melatonin rhythm in the pineal gland and circulation of the adult Djungarian hamster	1994	Journal of Pineal Research	16	3		136	144		95	10.1111/j.1600-079X.1994.tb00093.x	https://www.scopus.com/inward/record.uri?eid=2-s2.0-0028417662&doi=10.1111%2fj.1600-079X.1994.tb00093.x&partnerID=40&md5=dae551e3d766658ffd8317d84336b022	Division of Perinatal Biology, Loma Linda University, School of Medicine, Loma Linda, California, United States	Yellon, S.M., Division of Perinatal Biology, Loma Linda University, School of Medicine, Loma Linda, California, United States	Yellon SM. Acute 60Hz magnetic field exposure effects on the nucleation rhythm in the pineal gland and circulation of the adult Djungarian hamster. J. Pineal Res. 1994; 16: 136–144. Adult male and female hamsters in long days (16 hr of light) were exposed to a 1 gauss 60 Hz magnetic field for 15 min starting 2 hr before lights off. Sham‐exposed controls were placed in an adjacent exposure system …	circadian—biological; clock— suprachiasmatic nucleus	melatonin; animal; article; circadian rhythm; electromagnetic field; female; hamster; male; metabolism; Phodopus; pineal body; radiation exposure; Animal; Circadian Rhythm; Electromagnetic Fields; Female; Hamsters; Male; Melatonin; Phodopus; Pineal Gland; Support, U.S. Gov't, Non-P.H.S.; Support, U.S. Gov't, P.H.S.		melatonin, 73-31-4; Melatonin, 73-31-4							Yellon, S.M.; Division of Perinatal Biology, Loma Linda University, School of Medicine, Loma Linda, California, 92350, United States								7423098			7932036	English	J. Pineal Res.	Article	Final		Scopus	2-s2.0-0028417662	1994_Yellon_Acute	1994_Yellon_Acute.pdf	https://sci-hub.se/10.1111/j.1600-079X.1994.tb00093.x	Y
Henderson D.E., Slickman A.M., Henderson S.K.	8418768600;6504260350;7201429945;	Quantitative HPLC determination of the antioxidant activity of capsaicin on the formation of lipid hydroperoxides of linoleic acid: A comparative study against BHT and melatonin	1999	Journal of Agricultural and Food Chemistry	47	7		2563	2570		94	10.1021/jf980949t	https://www.scopus.com/inward/record.uri?eid=2-s2.0-0032839157&doi=10.1021%2fjf980949t&partnerID=40&md5=d9b05ba974332d1eedcf7f80f850c7e6	Chemistry Department, Trinity College, Hartford, CT 06106, United States; Chemistry Department, Quinnipiac College, Hamden, CT 06518, United States	Henderson, D.E., Chemistry Department, Trinity College, Hartford, CT 06106, United States; Slickman, A.M., Chemistry Department, Trinity College, Hartford, CT 06106, United States; Henderson, S.K., Chemistry Department, Quinnipiac College, Hamden, CT 06518, United States	The antioxidant activity of capsaicin, as compared to BHT and melatonin, was determined by the direct measurement of lipid hydroperoxides formed upon linoleic acid autoxidation initiated by AIBN. The formation of four isomeric lipid hydroperoxides was detected after reverse-phase HPLC separation. Data from three detectors, UV absorption, glassy carbon electrode electrochemical detection, and post…	Antioxidant; APCI-MS; Butylated hydroxytoluene; Capsaicin; Electrochemical detection; HPLC; Linoleic acid autoxidation; Lipid hydroperoxide; Melatonin	antioxidant; butylcresol; capsaicin; linoleic acid; lipid hydroperoxide; lipid peroxide; luminol; melatonin; antioxidant activity; article; autooxidation; chemistry; chemoluminescence; comparative study; electrochemical detection; high performance liquid chromatography; light absorption; lipid oxidation; mass spectrometry; methodology; synthesis; Antioxidants; Butylated Hydroxytoluene; Capsaicin;…		Antioxidants; Butylated Hydroxytoluene, 128-37-0; Capsaicin, 404-86-4; Linoleic Acid, 2197-37-7; Lipid Peroxides; Melatonin, 73-31-4							Henderson, D.E.; Chemistry Department, Trinity College, Hartford, CT 06106, United States; email: david.henderson@trincoll.edu								218561		JAFCA	10552527	English	J. Agric. Food Chem.	Article	Final		Scopus	2-s2.0-0032839157	1999_Henderson_Quantitative	1999_Henderson_Quantitative.pdf	https://sci-hub.se/10.1021/jf980949t	Y
Cagnacci A., Kräuchi K., Wirz-Justice A., Volpe A.	7005516868;7003651460;7005425500;7202342074;	Homeostatic versus Circadian Effects of Melatonin on Core Body Temperature in Humans	1997	Journal of Biological Rhythms	12	6		509	517		94	10.1177/074873049701200604	https://www.scopus.com/inward/record.uri?eid=2-s2.0-0031306962&doi=10.1177%2f074873049701200604&partnerID=40&md5=5e513d4716367e1efa6e603ab10ddaca	Inst. Pathophysiology of Hum. Repro., University of Modena, 41100 Modena, Italy; Chronobiology and Sleep Laboratory, Psychiatric University Clinic, CH-4025 Basel, Switzerland; Ist. di Fisiopatol. della Ripro. Um., via del Pozzo 71, 41100 Modena, Italy	Cagnacci, A., Inst. Pathophysiology of Hum. Repro., University of Modena, 41100 Modena, Italy, Ist. di Fisiopatol. della Ripro. Um., via del Pozzo 71, 41100 Modena, Italy; Kräuchi, K., Chronobiology and Sleep Laboratory, Psychiatric University Clinic, CH-4025 Basel, Switzerland; Wirz-Justice, A., Chronobiology and Sleep Laboratory, Psychiatric University Clinic, CH-4025 Basel, Switzerland; Volpe,…	Evidence obtained in animals has suggested a link of the pineal gland and its hormone melatonin with the regulation of core body temperature (CBT). Depending on the species considered, melatonin intervenes in generating seasonal rhythms of daily torpor and hibernation, in heat stress tolerance, and in setting the CBT set point. In humans, the circadian rhythm of melatonin is strictly associated w…	Aging; Body temperature; Circadian rhythms; Humans; Light; Melatonin; Menstrual cycle	Animalia; melatonin; body temperature; circadian rhythm; female; homeostasis; human; physiology; review; Body Temperature; Circadian Rhythm; Female; Homeostasis; Humans; Melatonin		Melatonin, 73-31-4							Cagnacci, A.; Ist. di Fisiopatol. della Ripro. Um., via del Pozzo 71, 41100 Modena, Italy			SAGE Publications Inc.					7487304		JBRHE	9406024	English	J. Biol. Rhythms	Article	Final		Scopus	2-s2.0-0031306962	1997_Cagnacci_Homeostatic	1997_Cagnacci_Homeostatic.pdf	https://sci-hub.se/10.1177/074873049701200604	Y
Bayarri M.J., Madrid J.A., Sánchez-Vázquez F.J.	36785039200;7006900341;7003727141;	Influence of light intensity, spectrum and orientation on sea bass plasma and ocular melatonin	2002	Journal of Pineal Research	32	1		34	40		93	10.1034/j.1600-079x.2002.10806.x	https://www.scopus.com/inward/record.uri?eid=2-s2.0-0036163793&doi=10.1034%2fj.1600-079x.2002.10806.x&partnerID=40&md5=b8b91e41aff29d283300d60e2c3bce35	Department of Physiology, Faculty of Biology, University of Murcia, 30100-Murcia, Spain	Bayarri, M.J., Department of Physiology, Faculty of Biology, University of Murcia, 30100-Murcia, Spain; Madrid, J.A., Department of Physiology, Faculty of Biology, University of Murcia, 30100-Murcia, Spain; Sánchez-Vázquez, F.J., Department of Physiology, Faculty of Biology, University of Murcia, 30100-Murcia, Spain	Melatonin is involved in the transduction of light information and the photoperiodic control of many important physiological functions in fish. Although artificial photoperiods have been used to improve fish growth and manipulate reproduction, there is little information about the characteristics of light 'quality'. In this paper we describe the effects of a light pulse in the middle of the dark …	Dicentrarchus labrax; Light pulses; Melatonin; Upwards light; Wavelength	melatonin; animal experiment; article; controlled study; fish; growth; hormone synthesis; illumination; light intensity; nonhuman; photoperiodicity; reproduction; spectral sensitivity; white light; Animals; Bass; Eye; Light; Melatonin; Optics; Photoperiod		Melatonin, 73-31-4							Sánchez-Vázquez, F.J.; Department of Physiology, Faculty of Biology, University of Murcia, 30100-Murcia, Spain; email: javisan@um.es								7423098		JPRSE	11841598	English	J. Pineal Res.	Article	Final		Scopus	2-s2.0-0036163793	2002_Bayarri_Influence	2002_Bayarri_Influence.pdf	https://sci-hub.se/10.1034/j.1600-079x.2002.10806.x	Y
Santhi N., Thorne H.C., Van Der Veen D.R., Johnsen S., Mills S.L., Hommes V., Schlangen L.J.M., Archer S.N., Dijk D.-J.	8945315800;24470611200;8954977600;8911726400;57196499965;8957694900;6602823027;7202456398;7007018167;	The spectral composition of evening light and individual differences in the suppression of melatonin and delay of sleep in humans	2012	Journal of Pineal Research	53	1		47	59		93	10.1111/j.1600-079X.2011.00970.x	https://www.scopus.com/inward/record.uri?eid=2-s2.0-84857177597&doi=10.1111%2fj.1600-079X.2011.00970.x&partnerID=40&md5=f826fec595f0213767d35f0a1db01f11	Surrey Sleep Research Centre, Faculty of Health and Medical Sciences, University of Surrey, Egerton Road, Guildford, Surrey, GU2 7XP, United Kingdom; Surrey Clinical Research Centre, Faculty of Health and Medical Sciences, University of Surrey, Guildford, United Kingdom; Philips Lighting, Eindhoven, Netherlands	Santhi, N., Surrey Sleep Research Centre, Faculty of Health and Medical Sciences, University of Surrey, Egerton Road, Guildford, Surrey, GU2 7XP, United Kingdom; Thorne, H.C., Surrey Sleep Research Centre, Faculty of Health and Medical Sciences, University of Surrey, Egerton Road, Guildford, Surrey, GU2 7XP, United Kingdom; Van Der Veen, D.R., Surrey Sleep Research Centre, Faculty of Health and M…	The effect of light on circadian rhythms and sleep is mediated by a multi-component photoreceptive system of rods, cones and melanopsinexpressing intrinsically photosensitive retinal ganglion cells. The intensity and spectral sensitivity characteristics of this system are to be fully determined.Whether the intensity and spectral composition of light exposure at home in the evening is such that it…	Actigraphy; Circadian; Melanopsin; Photopic; Photoreceptors; Polychromatic light	melanopsin; melatonin; adult; article; circadian rhythm; controlled study; electroencephalography; female; home environment; hormone blood level; human; human experiment; light exposure; male; normal human; photopic vision; sleep time; somnolence; spectral sensitivity; Adult; Circadian Clocks; Cross-Sectional Studies; Electroencephalography; Female; Humans; Male; Melatonin; Photic Stimulation; Ph…		melanopsin, 403476-86-8; melatonin, 73-31-4; Melatonin, 73-31-4; Rod Opsins; melanopsin							Santhi, N.; Surrey Sleep Research Centre, Faculty of Health and Medical Sciences, University of Surrey, Egerton Road, Guildford, Surrey, GU2 7XP, United Kingdom; email: n.santhi@surrey.ac.uk								7423098		JPRSE	22017511	English	J. Pineal Res.	Article	Final		Scopus	2-s2.0-84857177597	2012_Santhi_The	2012_Santhi_The.pdf	https://sci-hub.se/10.1111/j.1600-079X.2011.00970.x	Y
Blask D.E., Dauchy R.T., Sauer L.A., Krause J.A., Brainard G.C.	7006151595;7004364685;7004486514;7202955193;7003540124;	Growth and fatty acid metabolism of human breast cancer (MCF-7) xenografts in nude rats: Impact of constant light-induced nocturnal melatonin suppression	2003	Breast Cancer Research and Treatment	79	3		313	320		92	10.1023/A:1024030518065	https://www.scopus.com/inward/record.uri?eid=2-s2.0-0037561598&doi=10.1023%2fA%3a1024030518065&partnerID=40&md5=6a3fddf135698cee41cc093958da4ba4	Lab. of Chrono-Neuroendocrine Oncol., Bassett Research Institute, Cooperstown, NY, United States; Department of Neurology, Jefferson Medical College, Thomas Jefferson University, Philadelphia, PA, United States; Lab. of Chrono-Neuroendocrine Oncol., Bassett Research Institute, One Atwell Road, Cooperstown, NY 13326, United States	Blask, D.E., Lab. of Chrono-Neuroendocrine Oncol., Bassett Research Institute, Cooperstown, NY, United States, Lab. of Chrono-Neuroendocrine Oncol., Bassett Research Institute, One Atwell Road, Cooperstown, NY 13326, United States; Dauchy, R.T., Lab. of Chrono-Neuroendocrine Oncol., Bassett Research Institute, Cooperstown, NY, United States; Sauer, L.A., Lab. of Chrono-Neuroendocrine Oncol., Bass…	The nocturnal melatonin (MLT) surge is a relevant oncostatic signal for a variety of experimental malignancies. Population studies support the hypothesis that exposure to light at night may represent a new risk factor for breast cancer possibly through the suppression of pineal MLT production and/or circadian disruption. We tested the ability of constant light exposure to suppress MLT production …	Circadian disruption; Constant light; Fatty acids; MCF-7 human breast cancer xenografts; Melatonin; Pineal gland	13 hydroxyoctadecadienoic acid; fatty acid; linoleic acid; melatonin; mitogenic agent; unclassified drug; article; breast carcinogenesis; cancer growth; cell strain MCF 7; circadian rhythm; controlled study; fatty acid metabolism; human; human cell; light; light exposure; night; priority journal; rat strain; risk factor; tumor xenograft; Non-programmatic; Animals; Antioxidants; Antithrombins; Bre…		linoleic acid, 1509-85-9, 2197-37-7, 60-33-3, 822-17-3; melatonin, 73-31-4; 13-hydroxy-9,11-octadecadienoic acid, 5204-88-6; Antioxidants; Antithrombins; Linoleic Acid, 2197-37-7; Linoleic Acids; Melatonin, 73-31-4			Edwin W. Pauley Foundation National Cancer Institute: RO1 CA76197, DEB, RO1 CA85408	This work was supported by National Cancer Institute Grants RO1 CA85408 and RO1 CA76197 (to DEB), the Laura Evans Memorial Breast Cancer Award of the Edwin W. Pauley Foundation (to DEB) and the Stephen C. Clark Research Fund.			Blask, D.E.; Lab. of Chrono-Neuroendocrine Oncol., Bassett Research Institute, One Atwell Road, Cooperstown, NY 13326, United States; email: david.blask@bassett.org								1676806		BCTRD	12846415	English	Breast Cancer Res. Treat.	Article	Final		Scopus	2-s2.0-0037561598	2003_Blask_Growth	2003_Blask_Growth.pdf	https://sci-hub.se/10.1023/A:1024030518065	Y
Underwood H.	7005603596;	Pineal melatonin rhythms in the lizard Anolis carolinensis: effects of light and temperature cycles	1985	Journal of Comparative Physiology A	157	1		57	65		91	10.1007/BF00611095	https://www.scopus.com/inward/record.uri?eid=2-s2.0-0022087080&doi=10.1007%2fBF00611095&partnerID=40&md5=1018a5c9f8fea8a88e4c3d0761d97417	Department of Zoology, North Carolina State University, Raleigh, 27695, North Carolina, United States	Underwood, H., Department of Zoology, North Carolina State University, Raleigh, 27695, North Carolina, United States	Pineal and ocular melatonin was assessed, over 24 h periods, in male lizards (Anolis carolinensis) entrained to 24 h light-dark (LD) cycles and a constant 32 ‡C, and in lizards entrained to both 24 h LD cycles and 24 h temperature cycles (32 ‡C/20 ‡C). At a constant temperature, the duration of the photoperiod has a profound effect on the duration, amplitude, and phase of the pineal melatonin rhy…		melatonin; animal; article; circadian rhythm; light; lizard; metabolism; motor activity; physiology; pineal body; temperature; visual system function; Animal; Circadian Rhythm; Light; Lizards; Melatonin; Motor Activity; Ocular Physiology; Pineal Gland; Support, U.S. Gov't, Non-P.H.S.; Support, U.S. Gov't, P.H.S.; Temperature		melatonin, 73-31-4; Melatonin, 73-31-4							Underwood, H.; Department of Zoology, North Carolina State University, Raleigh, 27695, North Carolina, United States			Springer-Verlag					3407594		JCPAD	3837087	English	J. Comp. Physiol.	Article	Final		Scopus	2-s2.0-0022087080	1985_Underwood_Pineal	1985_Underwood_Pineal.pdf	https://sci-hub.se/10.1007/BF00611095	Y
Thompson C., Stinson D., Smith A.	7404238078;24371088800;57189162747;	Seasonal affective disorder and season-dependent abnormalities of melatonin suppression by light	1990	The Lancet	336	8717		703	706		91	10.1016/0140-6736(90)92202-S	https://www.scopus.com/inward/record.uri?eid=2-s2.0-0025150452&doi=10.1016%2f0140-6736%2890%2992202-S&partnerID=40&md5=57c92a2b095f591d23b443210062c9f7	Department of Psychiatry, University of Southampton, Royal South Hants Hospital, Southampton, United Kingdom; St George's Hospital, United Kingdon, London; Charing Cross Hospital, London, United Kingdom	Thompson, C., Department of Psychiatry, University of Southampton, Royal South Hants Hospital, Southampton, United Kingdom; Stinson, D., St George's Hospital, United Kingdon, London; Smith, A., Charing Cross Hospital, London, United Kingdom	Twelve patients with seasonal affective disorder (SAD) and eleven normal controls were exposed to 2000 lux and 300 lux of artificial full-spectrum light on consecutive nights during the winter. Suppression of melatonin secretion under the two light intensities was measured and the difference between their effects was taken as a measure of light sensitivity. The test was repeated in summer in both…		melatonin; affective neurosis; article; clinical article; controlled study; female; human; light sensitivity; male; priority journal; psychological aspect; seasonal variation; Adult; Comparative Study; Evaluation Studies; Female; Human; Light; Male; Melatonin; Middle Age; Mood Disorders; Periodicity; Phototherapy; Randomized Controlled Trials; Seasons; Suprachiasmatic Nucleus; Time Factors		Melatonin, 73-31-4							Thompson, C.; Department of Psychiatry, University of Southampton, Royal South Hants Hospital, Southampton, United Kingdom								1406736		LANCA	1975891	English	Lancet	Article	Final		Scopus	2-s2.0-0025150452	1990_Thompson_Seasonal	1990_Thompson_Seasonal.pdf	https://sci-hub.se/10.1016/0140-6736(90)92202-S	Y
Rosenthal N.E., Jacobsen F.M., Sack D.A., Arendt J., James S.P., Parry B.L., Wehr T.A.	7102033351;7102473867;24397819900;7101704924;7402533215;7102441431;7004768783;	Atenolol in seasonal affective disorder: A test of the melatoninn hypothesis	1988	American Journal of Psychiatry	145	1		52	56		91	10.1176/ajp.145.1.52	https://www.scopus.com/inward/record.uri?eid=2-s2.0-0023835655&doi=10.1176%2fajp.145.1.52&partnerID=40&md5=f356bb8834747df378e4e6e6faef4a5e	Clinical Psychobiology Branch, Bethesda, MD 20892, United States	Rosenthal, N.E., Clinical Psychobiology Branch, Bethesda, MD 20892, United States; Jacobsen, F.M., Clinical Psychobiology Branch, Bethesda, MD 20892, United States; Sack, D.A., Clinical Psychobiology Branch, Bethesda, MD 20892, United States; Arendt, J., Clinical Psychobiology Branch, Bethesda, MD 20892, United States; James, S.P., Clinical Psychobiology Branch, Bethesda, MD 20892, United States;…	To test the hypothesis that the antidepressant effects of bright light in seasonal affective disorder are mediated by the suppression of melatonin, 19 patients with this disorder were given atenolol, which suppresses melatonin secretion, and placebo in a double-blind crossover study. No difference in antidepressant efficacy was found between drug and placebo in the sample as a whole, which argues…		atenolol; melatonin; adult; affective neurosis; clinical article; clinical trial; controlled study; human; phototherapy; psychological aspect		atenolol, 29122-68-7, 93379-54-5; melatonin, 73-31-4															0002953X		AJPSA	3276228	English	AM. J. PSYCHIATRY	Article	Final		Scopus	2-s2.0-0023835655	1988_Rosenthal_Atenolol	1988_Rosenthal_Atenolol.pdf	https://sci-hub.se/10.1176/ajp.145.1.52	Y
Willis G.L., Turner E.J.D.	7102225025;36644933900;	Primary and secondary features of Parkinson's disease improve with strategic exposure to bright light: A case series study	2007	Chronobiology International	24	3		521	537		90	10.1080/07420520701420717	https://www.scopus.com/inward/record.uri?eid=2-s2.0-34347385604&doi=10.1080%2f07420520701420717&partnerID=40&md5=44a27375f5edeb474eb93e365a560486	Bronowski Institute of Behavioural Neuroscience, Coliban Medical Centre, 19 Jennings St., Kyneton, Vic., Australia	Willis, G.L., Bronowski Institute of Behavioural Neuroscience, Coliban Medical Centre, 19 Jennings St., Kyneton, Vic., Australia; Turner, E.J.D., Bronowski Institute of Behavioural Neuroscience, Coliban Medical Centre, 19 Jennings St., Kyneton, Vic., Australia	The antagonism of melatonin in models of Parkinson's disease (PD) can reduce the severity of motor impairment associated with dopamine (DA) degeneration. In consideration of the potent antidepressant effects of bright light therapy (LT), that LT suppresses melatonin secretion, that depression is commonly observed in PD, and that exposure to constant light facilitates recovery from experimental PD…	Bright light therapy; Depression; Insomnia; Melatonin; Parkinson's disease	amantad; amantadine; antidepressant agent; benserazide plus levodopa; bromocriptine; bromocriptine mesilate; cabergoline; carbidopa plus levodopa; dosulepin; eldopril; levodopa; melatonin; monoamine oxidase inhibitor; pergolide mesilate; prothiadin; sedative agent; selegiline; sertraline; sinamet; trihexyphenidyl; unclassified drug; adult; aged; agitation; article; bradykinesia; clinical article;…		amantadine, 665-66-7, 768-94-5; benserazide plus levodopa, 37270-69-2; bromocriptine, 25614-03-3; bromocriptine mesilate, 22260-51-1; cabergoline, 81409-90-7; carbidopa plus levodopa, 57308-51-7; dosulepin, 113-53-1, 897-15-4; levodopa, 59-92-7; melatonin, 73-31-4; pergolide mesilate, 66104-23-2; selegiline, 14611-51-9, 14611-52-0, 2079-54-1, 2323-36-6; sertraline, 79617-96-2; trihexyphenidyl, 14…	amantad; artane; cabaser; eldopril; madopar; parlodel; permax; prothiadin; selegiline; sinamet; symmetrel; zoloft		Behavioural and Cognitive Neuroscience Institute, Simon Fraser University	The authors would like to acknowledge the Bronowski Institute of Behavioural Neuroscience for the financial support and equipment provided. Thanks also to Professor T. Norman for advice regarding data preparation. A brief summary of these results were reported at the Melatonin and Biological Rhythms Symposium, Satellite meeting of the XXXIV Congress of the International Union of Physiological Sci…			Willis, G.L.; Bronowski Institute of Behavioural Neuroscience, Coliban Medical Centre, 19 Jennings St., Kyneton, Vic., Australia; email: gwillbro@nex.net.au								7420528		CHBIE	17612949	English	Chronobiol. Int.	Article	Final		Scopus	2-s2.0-34347385604	2007_Willis_Primary	2007_Willis_Primary.pdf	https://sci-hub.se/10.1080/07420520701420717	?
Yellon S.M., Fagoaga O.R., Nehlsen-Cannarella S.L.	7006640939;7003893027;7004435096;	Influence of photoperiod on immune cell functions in the male Siberian hamster	1999	American Journal of Physiology - Regulatory Integrative and Comparative Physiology	276	1 45-1		R97	R102		89		https://www.scopus.com/inward/record.uri?eid=2-s2.0-0032891244&partnerID=40&md5=5c47da85f3d32288bddea4bca6b5f891	Center for Perinatal Biology, Loma Linda Univ. School of Medicine, Loma Linda, CA 92350, United States; Immunology Center, Loma Linda University Medical Center, Loma Linda, CA 92350, United States; Depts. of Pathology and Physiology, Loma Linda Univ. School of Medicine, Loma Linda, CA 92350, United States; Loma Linda Univ., Center for Perinatal Biology, Loma Linda, CA 92350, United States	Yellon, S.M., Center for Perinatal Biology, Loma Linda Univ. School of Medicine, Loma Linda, CA 92350, United States, Loma Linda Univ., Center for Perinatal Biology, Loma Linda, CA 92350, United States; Fagoaga, O.R., Immunology Center, Loma Linda University Medical Center, Loma Linda, CA 92350, United States; Nehlsen-Cannarella, S.L., Immunology Center, Loma Linda University Medical Center, Loma…	The present study tested the hypothesis that immune cell function is influenced by ambient photoperiod. The male Siberian hamster served as the experimental model because day length regulates a variety of seasonal adaptations in physiology. Adult hamsters were in long days (16 h of light daily), which sustains gonadal function, or transferred to short days (8 h) for >4 wk to induce testes regress…	Immunology; Lymphocytes; Phagocytosis; Pineal melatonin; Seasonal reproduction	melatonin; animal cell; article; cell function; cell survival; hamster; immunocompetent cell; lymphocyte transformation; natural killer cell; nonhuman; oxidative stress; phagocytosis; photoperiodicity; priority journal; seasonal variation; statistical analysis; Animals; Blood Cells; Cricetinae; Cytotoxicity, Immunologic; Immune System; Killer Cells, Natural; Lymphocytes; Male; Phagocytosis; Phodo…		Thymidine, 50-89-5							Yellon, S.M.; Loma Linda Univ., Center for Perinatal Biology, Loma Linda, CA 92350, United States								3636119		AJPRD	9887182	English	Am. J. Physiol. Regul. Integr. Comp. Physiol.	Article	Final		Scopus	2-s2.0-0032891244	1999_Yellon_Influence	1999_Yellon_Influence.pdf	https://sci-hub.se/	?
Aoki H., Yamada N., Ozeki Y., Yamane H., Kato N.	7402574489;56808088100;7103381979;7202442958;7403474259;	Minimum light intensity required to suppress nocturnal melatonin concentration in human saliva	1998	Neuroscience Letters	252	2		91	94		89	10.1016/S0304-3940(98)00548-5	https://www.scopus.com/inward/record.uri?eid=2-s2.0-0032563355&doi=10.1016%2fS0304-3940%2898%2900548-5&partnerID=40&md5=d7b13332da865812d2f202018c04d770	Department of Psychiatry, Shiga Univ. Med. Sci., O., Shiga, Japan	Aoki, H., Department of Psychiatry, Shiga Univ. Med. Sci., O., Shiga, Japan; Yamada, N., Department of Psychiatry, Shiga Univ. Med. Sci., O., Shiga, Japan; Ozeki, Y., Department of Psychiatry, Shiga Univ. Med. Sci., O., Shiga, Japan; Yamane, H., Department of Psychiatry, Shiga Univ. Med. Sci., O., Shiga, Japan; Kato, N., Department of Psychiatry, Shiga Univ. Med. Sci., O., Shiga, Japan	We set out to determine the minimum intensity of light able to suppress nocturnal melatonin levels as measured in normal human saliva. Five healthy male volunteers were exposed to light at different intensities (<10, 500, 1000, 2500, and 5000 lux) in a repeated measure design. Suppression of melatonin was dependent on both light intensity and duration of light exposure. Minimum intensities of lig…	Duration of light exposure; Light; Melatonin; Minimum intensity; Suppression	melatonin; adult; article; controlled study; hormone inhibition; human; light exposure; male; night; normal human; priority journal; saliva analysis; saliva level; Adult; Circadian Rhythm; Humans; Male; Melatonin; Photic Stimulation; Saliva; Sleep; Wakefulness		Melatonin, 73-31-4							Yamada, N.; Department of Psychiatry, Shiga University of Medical Science, Otsu, Shiga, 520-2192, Japan; email: naoto@belle.shiga-med.ac.jp								3043940		NELED	9756329	English	Neurosci. Lett.	Article	Final		Scopus	2-s2.0-0032563355	1998_Aoki_Minimum	1998_Aoki_Minimum.pdf	https://sci-hub.se/10.1016/S0304-3940(98)00548-5	Y
Chang A.-M., Scheer F.A.J.L., Czeisler C.A.	28567503000;6603581864;7006224092;	The human circadian system adapts to prior photic history	2011	Journal of Physiology	589	5		1095	1102		88	10.1113/jphysiol.2010.201194	https://www.scopus.com/inward/record.uri?eid=2-s2.0-79951991161&doi=10.1113%2fjphysiol.2010.201194&partnerID=40&md5=afe61c64dd95a83499f746f579662e33	Division of Sleep Medicine, Department of Medicine, Brigham and Women's Hospital and Harvard Medical School, 221 Longwood Avenue, Boston, MA, United States	Chang, A.-M., Division of Sleep Medicine, Department of Medicine, Brigham and Women's Hospital and Harvard Medical School, 221 Longwood Avenue, Boston, MA, United States; Scheer, F.A.J.L., Division of Sleep Medicine, Department of Medicine, Brigham and Women's Hospital and Harvard Medical School, 221 Longwood Avenue, Boston, MA, United States; Czeisler, C.A., Division of Sleep Medicine, Departmen…	Light is the most potent stimulus for synchronizing the endogenous circadian timing system to the 24 h day. The timing, intensity, duration, pattern and wavelength of light are known to modulate photic resetting of the circadian system and acute suppression of melatonin secretion. The effect of prior photic history on these processes, however, is not well understood. Although previous studies hav…		melatonin; adaptive behavior; adult; article; circadian rhythm; female; human; human experiment; light exposure; light intensity; male; normal human; photoacclimatization; photoperiodicity; photostimulation; priority journal; spectral sensitivity; stimulus response; Adaptation, Physiological; Adolescent; Adult; Area Under Curve; Circadian Rhythm; Cross-Over Studies; Female; Humans; Light; Male; M…		melatonin, 73-31-4; Melatonin, 73-31-4							Chang, A.-M.; Brigham and Women's Hospital/Harvard Medical School, 221 Longwood Avenue, Suite 438, Boston, MA 02115, United States; email: amchang@rics.bwh.harvard.edu								223751		JPHYA	21224217	English	J. Physiol.	Article	Final		Scopus	2-s2.0-79951991161	2011_Chang_The	2011_Chang_The.pdf	https://sci-hub.se/10.1113/jphysiol.2010.201194	Y
Michael Iuvone P.	56002452900;	Evidence for a D2 dopamine receptor in frog retina that decreases cyclic AMP accumulation and serotonin N-acetyl transferase activity	1986	Life Sciences	38	4		331	342		87	10.1016/0024-3205(86)90080-9	https://www.scopus.com/inward/record.uri?eid=2-s2.0-0022647310&doi=10.1016%2f0024-3205%2886%2990080-9&partnerID=40&md5=ca6eb2c4511f5c210a885c34be75df76	Department of Pharmacology Emory University School of Medicine Atlanta, GA 30322, United States	Michael Iuvone, P., Department of Pharmacology Emory University School of Medicine Atlanta, GA 30322, United States	The regulation of serotonin N-acetyltransferase (NAT) activity and cyclic AMP accumulation in the retina of the African clawed frog (Xenopus laevis) was studied using an in vitro eye cup preparation. Retinal NAT, a key enzyme in the synthesis of melatonin, is expressed as a circadian rhythm with peak activity at night. The increase of NAT activity at night appears to be mediated by cyclic AMP and…		2,3,4,5 tetrahydro 7,8 dihydroxy 1 phenyl 1h 3 benzazepine; 8 chloro 2,3,4,5 tetrahydro 3 methyl 5 phenyl 1h 3 benzazepin 7 ol hydrogen maleate; acyltransferase; cyclic amp; dopamine; dopamine 2 receptor; isobutylmethylxanthine; metoclopramide; quinpirole; spiperone; animal cell; dose response; drug comparison; drug receptor binding; drug response; frog; nonhuman; pharmacokinetics; priority journ…		2,3,4,5 tetrahydro 7,8 dihydroxy 1 phenyl 1h 3 benzazepine, 67287-49-4; 8 chloro 2,3,4,5 tetrahydro 3 methyl 5 phenyl 1h 3 benzazepin 7 ol hydrogen maleate, 87134-87-0; acyltransferase, 9012-30-0, 9054-54-0; cyclic AMP, 60-92-4; dopamine, 51-61-6, 62-31-7; isobutylmethylxanthine, 28822-58-4; metoclopramide, 12707-59-4, 2576-84-3, 364-62-5, 7232-21-5; quinpirole, 73625-62-4, 80373-22-4, 85760-75-4…	ly 171555; sch 23390; skf 38393	lilly, United States; sigma, United States; sk & f, United States	National Institutes of Health: EY 04854, EY 02414	I thank Joe Besharse and Mary Pierce for meaningful discussion of this research, Jeff Boatright and Gwen Spratt for their excellent technical assistance, Bonnie Butler for her art work, and Narlise Casteel for processing the manuscript. This research was supported by grants from the National Institutes of Health EY 04854 and EY 02414.			Michael Iuvone, P.; Department of Pharmacology Emory University School of Medicine Atlanta, GA 30322, United States								243205		LIFSA	2418326	English	Life Sci.	Article	Final		Scopus	2-s2.0-0022647310	1986_Michael_Evidence	1986_Michael_Evidence.pdf	https://sci-hub.se/10.1016/0024-3205(86)90080-9	Y
Bayarri M.J., Rodríguez L., Zanuy S., Madrid J.A., Sánchez-Vázquez F.J., Kagawa H., Okuzawa K., Carrillo M.	36785039200;7402239629;7005260325;7006900341;7003727141;7103065069;7003913999;7102242514;	Effect of photoperiod manipulation on the daily rhythms of melatonin and reproductive hormones in caged European sea bass (Dicentrarchus labrax)	2004	General and Comparative Endocrinology	136	1		72	81		87	10.1016/j.ygcen.2003.12.004	https://www.scopus.com/inward/record.uri?eid=2-s2.0-1042298813&doi=10.1016%2fj.ygcen.2003.12.004&partnerID=40&md5=797fe7745604c9c1f7c45927b023834a	Department of Physiology, Faculty of Biology, University of Murcia, Murcia 30100, Spain; Dept. of Fish Repro. Physiology, Inst. de Acuicultura de Torre la Sal, Consejo Sup. de, Invest. Cie., Castellón 12595, Spain; Division of Fisheries Science, Faculty of Agriculture, Miyazaki University, Miyazaki 889-2192, Japan; Natl. Res. Institute of Aquaculture, Fisheries Research Agency, Nansei, Watarai, M…	Bayarri, M.J., Department of Physiology, Faculty of Biology, University of Murcia, Murcia 30100, Spain; Rodríguez, L., Dept. of Fish Repro. Physiology, Inst. de Acuicultura de Torre la Sal, Consejo Sup. de, Invest. Cie., Castellón 12595, Spain; Zanuy, S., Dept. of Fish Repro. Physiology, Inst. de Acuicultura de Torre la Sal, Consejo Sup. de, Invest. Cie., Castellón 12595, Spain; Madrid, J.A., Dep…	Reproduction in fish is cyclical and timed to guarantee the survival of the offspring. Seasonal variations in reproductive hormones of fish have been deeply investigated in fish over the last years. However, there are few studies regarding the daily changes in reproductive hormone profiles in teleosts. The aim of the present research was to investigate the effects of photoperiod manipulation on m…	Daily rhythms; Dicentrarchus labrax; GnRH; LH; Melatonin; Photoperiod manipulation; Sexual steroids	11 oxotestosterone; gonadorelin; luteinizing hormone; melatonin; testosterone; animal experiment; animal tissue; article; circadian rhythm; circulation; controlled study; darkness; European sea bass; hormone blood level; hormone determination; hypophysis; illumination; light; luteinizing hormone release; male; nonhuman; photoperiodicity; priority journal; reproduction; seasonal variation; sex dif…		11 oxotestosterone, 564-35-2; gonadorelin, 33515-09-2, 9034-40-6; luteinizing hormone, 39341-83-8, 9002-67-9; melatonin, 73-31-4; testosterone, 58-22-0			1FD97-1699 AGL2001-0593-(03-01	This research was funded by the MCYT Projects No. 1FD97-1699 and AGL2001-0593-(03-01) to Dr. F.J. Sánchez-Vázquez and Dr. S. Zanuy. Authors thank CULMAREX, S.A. for offering us their facilities and its R&D assistant (M.C. Marı́n), for her help.			Carrillo, M.; Dept. of Fish Repro. Physiology, Inst. de Acuicultura de Torre la Sal, Consejo Sup. de, Invest. Cie., Castellón 12595, Spain; email: carrillo@iats.csic.es			Academic Press Inc.					166480		GCENA	14980798	English	Gen. Comp. Endocrinol.	Article	Final		Scopus	2-s2.0-1042298813	2004_Bayarri_Effect	2004_Bayarri_Effect.pdf	https://sci-hub.se/10.1016/j.ygcen.2003.12.004	Y
Wehr T.A., Giesen H.A., Moul D.E., Turner E.H., Schwartz P.J.	7004768783;7004607462;7003927137;7202447855;36890552800;	Suppression of men's responses to seasonal changes in day length by modern artificial lighting	1995	American Journal of Physiology - Regulatory Integrative and Comparative Physiology	269	1 38-1/II		R173	R178		87	10.1152/ajpregu.1995.269.1.r173	https://www.scopus.com/inward/record.uri?eid=2-s2.0-0029122688&partnerID=40&md5=a7ba3cabcb31caa312cf1f23a80f489e	Clinical Psychobiology Branch, NIMH, Bldg. 10, 10 Center Drive, Bethesda, MD 20892-1390, United States	Wehr, T.A., Clinical Psychobiology Branch, NIMH, Bldg. 10, 10 Center Drive, Bethesda, MD 20892-1390, United States; Giesen, H.A., Clinical Psychobiology Branch, NIMH, Bldg. 10, 10 Center Drive, Bethesda, MD 20892-1390, United States; Moul, D.E., Clinical Psychobiology Branch, NIMH, Bldg. 10, 10 Center Drive, Bethesda, MD 20892-1390, United States; Turner, E.H., Clinical Psychobiology Branch, NIMH…	We recently reported that humans have conserved mechanisms, like those that exist in other animals, which detect changes in day length and make corresponding adjustments in the duration of nocturnal periods of secretion of melatonin and of other functions. We detected these responses in individuals who were exposed to artificial 'days' of different durations. The purpose of the present study was …	body temperature; circadian rhythm; cortisol; light; melatonin; photoperiod; seasons; thyrotropin	melatonin; adult; article; behavior; body temperature; circadian rhythm; clinical article; hormone release; hormone response; human; illumination; male; photoperiodicity; priority journal; seasonal variation; sleep waking cycle; sunlight; suprachiasmatic nucleus; urban area; Adaptation, Physiological; Adult; Circadian Rhythm; Human; Lighting; Male; Melatonin; Middle Age; Photoperiod; Seasons; Sex…		melatonin, 73-31-4; Melatonin, 73-31-4							Wehr, T.A.; Clinical Psychobiology Branch, NIMH, Bldg. 10, 10 Center Drive, Bethesda, MD 20892-1390, United States								3636119		AJPRD	7631890	English	AM. J. PHYSIOL. REGUL. INTEGR. COMP. PHYSIOL.	Article	Final		Scopus	2-s2.0-0029122688	1995_Wehr_Suppression	1995_Wehr_Suppression.pdf	https://sci-hub.se/10.1152/ajpregu.1995.269.1.r173	Y
Revell V.L., Skene D.J.	8613504500;21035951300;	Light-induced melatonin suppression in humans with polychromatic and monochromatic light	2007	Chronobiology International	24	6		1125	1137		85	10.1080/07420520701800652	https://www.scopus.com/inward/record.uri?eid=2-s2.0-37149044401&doi=10.1080%2f07420520701800652&partnerID=40&md5=1e9aa4b02dcd7917a937b2f37265b81d	Faculty of Health and Medical Sciences, Human Chronobiology Group, University of Surrey, Guildford, Surrey, United Kingdom; Faculty of Health and Medical Sciences, Human Chronobiology Group, University of Surrey, Guildford, Surrey, GU2 7XH, United Kingdom	Revell, V.L., Faculty of Health and Medical Sciences, Human Chronobiology Group, University of Surrey, Guildford, Surrey, United Kingdom, Faculty of Health and Medical Sciences, Human Chronobiology Group, University of Surrey, Guildford, Surrey, GU2 7XH, United Kingdom; Skene, D.J., Faculty of Health and Medical Sciences, Human Chronobiology Group, University of Surrey, Guildford, Surrey, United …	The relative contribution of rods, cones, and melanopsin to non-image-forming (NIF) responses under light conditions differing in irradiance, duration, and spectral composition remains to be determined in humans. NIF responses to a polychromatic light source may be very different to that predicted from the published human action spectra data, which have utilized narrow band monochromatic light an…	Human; Light; Melanopsin; Melatonin suppression	melanopsin; melatonin; adult; analysis of variance; article; blood sampling; blue light; controlled study; human; human experiment; light intensity; light irradiance; male; normal human; photon; statistical analysis; white light; Adolescent; Adult; Cross-Over Studies; Humans; Lighting; Male; Melatonin; Opsin		melanopsin, 403476-86-8; melatonin, 73-31-4; melanopsin; Melatonin, 73-31-4; Opsin			18741	Submitted May 4, 2007, Returned for revision July 2, 2007, Accepted September 5, 2007 Both authors are supported by the 6th Framework project EUCLOCK (no. 018741). Address correspondence to Victoria L. Revell, PhD, Faculty of Health and Medical Sciences, Human Chronobiology Group, University of Surrey, Guildford, Surrey, GU2 7XH, UK. Tel.: þ 44 1483 689383; Fax: þ44 1483 689712; E-mail: v.revell@…			Revell, V.L.; Faculty of Health and Medical Sciences, Human Chronobiology Group, University of Surrey, Guildford, Surrey, GU2 7XH, United Kingdom; email: v.revell@surrey.ac.uk								7420528		CHBIE	18075803	English	Chronobiol. Int.	Article	Final		Scopus	2-s2.0-37149044401	2007_Revell_Light-induced	2007_Revell_Light-induced.pdf	https://sci-hub.se/10.1080/07420520701800652	Y
Van Der Lely S., Frey S., Garbazza C., Wirz-Justice A., Jenni O.G., Steiner R., Wolf S., Cajochen C., Bromundt V., Schmidt C.	57209509380;26655559500;56401876200;7005425500;6602119214;57197492489;56401476500;7003530216;6508008168;57199462959;	Blue blocker glasses as a countermeasure for alerting effects of evening light-emitting diode screen exposure in male teenagers	2015	Journal of Adolescent Health	56	1		113	119		84	10.1016/j.jadohealth.2014.08.002	https://www.scopus.com/inward/record.uri?eid=2-s2.0-84919421027&doi=10.1016%2fj.jadohealth.2014.08.002&partnerID=40&md5=a291e20d555c903f6834233d994bd2e0	Centre for Chronobiology, Psychiatric Hospital of the University of Basel, Wilhelm Klein-Strasse 27, Basel, CH-4012, Switzerland; Child Development Center, University Children's Hospital Zürich, Zürich, Switzerland; Department of Physics, University of Basel, Basel, Switzerland; Department of Mechanical Engineering, Lighting Engineering Group, Ilmenau University of Technology, Ilmenau, Germany	Van Der Lely, S., Centre for Chronobiology, Psychiatric Hospital of the University of Basel, Wilhelm Klein-Strasse 27, Basel, CH-4012, Switzerland; Frey, S., Centre for Chronobiology, Psychiatric Hospital of the University of Basel, Wilhelm Klein-Strasse 27, Basel, CH-4012, Switzerland; Garbazza, C., Centre for Chronobiology, Psychiatric Hospital of the University of Basel, Wilhelm Klein-Strasse …	Purpose Adolescents prefer sleep and wake times that are considerably delayed compared with younger children or adults. Concomitantly, multimedia use in the evening is prevalent among teenagers and involves light exposure, particularly in the blue-wavelength range to which the biological clock and its associated arousal promotion system is the most sensitive. We investigated whether the use of bl…	Alerting effects of light; Attention; LED screen use; Melatonin; Sleepewake cycle; Sleepiness	melatonin; melatonin; actimetry; adolescent; alertness; Article; attention; blue blocker glass; blue light; cognition; controlled study; electroencephalography; evening light emitting diode; human; human experiment; Leeds Sleep Evaluation Questionnaire; light emitting diode; light exposure; light intensity; male; multimedia; normal human; polysomnography; sleep quality; sleep waking cycle; somnol…		melatonin, 73-31-4; Melatonin			Jacobs Foundation Fraunhofer-Gesellschaft Jacobs Foundation	The authors thank Claudia Renz and Bühlmann Laboratories, Allschwil, Switzerland, for the melatonin assays, the volunteers for participating, and Alessia Ruf for helping to conduct the study. Many thanks to Dr. Alexandre Sasseville, Chron-optic Quebec, Canada, for providing the clear lenses control glasses, Dr. Oliver Stefani, Fraunhofer IAO/University Stuttgart IAT, Stuttgart, Germany, for provi…	This research was financially supported by Jacobs Foundation, Zurich, Switzerland .		Bromundt, V.; Centre for Chronobiology, Psychiatric Hospital of the University of Basel, Wilhelm Klein-Strasse 27, Switzerland			Elsevier USA					1054139X		JADHE	25287985	English	J. Adolesc. Health	Article	Final		Scopus	2-s2.0-84919421027	2015_Van_Blue	2015_Van_Blue.pdf	https://sci-hub.se/10.1016/j.jadohealth.2014.08.002	Y
Kliukiene J., Tynes T., Andersen A.	6602366774;7004321629;55415224800;	Risk of breast cancer among Norwegian women with visual impairment	2001	British Journal of Cancer	84	3		397	399		84	10.1054/bjoc.2000.1617	https://www.scopus.com/inward/record.uri?eid=2-s2.0-0035128737&doi=10.1054%2fbjoc.2000.1617&partnerID=40&md5=06220f8629fc039e9cba4591d87a73ab	The Cancer Registry of Norway, Montebello N-0310, Oslo, Norway; Norwegian Radiation Protection Authority, Kirkevn. 166, Oslo, N-0407, Norway	Kliukiene, J., The Cancer Registry of Norway, Montebello N-0310, Oslo, Norway; Tynes, T., The Cancer Registry of Norway, Montebello N-0310, Oslo, Norway, Norwegian Radiation Protection Authority, Kirkevn. 166, Oslo, N-0407, Norway; Andersen, A., The Cancer Registry of Norway, Montebello N-0310, Oslo, Norway	Experimental studies suggest that melatonin has a protective effect against breast cancer. Exposure to light suppresses melatonin secretion, but to a lesser degree in totally blind persons. Breast cancer was investigated in a cohort of 15 412 Norwegian visually impaired women. The risk among totally blind women was 0.64 (95% CI = 0.21-1.49, 5 cases only), and for those who became blind before age…	Blindness; Breast cancer; Melatonin; Visual impairment	melatonin; adult; aged; article; blindness; breast cancer; cancer risk; comorbidity; female; growth inhibition; hormonal regulation; human; light exposure; major clinical study; Norway; priority journal; risk assessment; tumor growth; visual acuity; visual impairment; Adolescent; Adult; Aged; Blindness; Breast Neoplasms; Female; Humans; Marital Status; Middle Aged; Norway; Risk Factors; Vision Di…									Kliukiene, J.; Cancer Registry of Norway, Montebello N-0310 Oslo, Norway								70920		BJCAA	11161406	English	Br. J. Cancer	Article	Final	Open Access	Scopus	2-s2.0-0035128737	2001_Kliukiene_Risk	2001_Kliukiene_Risk.pdf	https://sci-hub.se/10.1054/bjoc.2000.1617	Y
Nurnberger Jr. J.I., Berrettini W., Tamarkin L., Hamovit J., Norton J., Gershon E.	35353542700;7006304124;7003640553;6602583283;57192120650;7006407060;	Supersensitivity to melatonin suppression by light in young people at high risk for affective disorder. A preliminary report	1988	Neuropsychopharmacology	1	3		217	223		83	10.1016/0893-133X(88)90020-6	https://www.scopus.com/inward/record.uri?eid=2-s2.0-0024213031&doi=10.1016%2f0893-133X%2888%2990020-6&partnerID=40&md5=1e19bb2cd2f82c7d3e1de52786f7f702	Institute of Psychiatric Research, Department of Psychiatry, Indiana University School of Medicine, Indianapolis, IN, United States; Clinical Neurogenetics Branch Intramural Research Program, National Institute of Mental Health, Bethesda, MD, United States; Clinical Psychobiology Branch, Intramural Research Program, National Institute of Mental Health, Bethesda, MD, United States	Nurnberger Jr., J.I., Institute of Psychiatric Research, Department of Psychiatry, Indiana University School of Medicine, Indianapolis, IN, United States; Berrettini, W., Clinical Neurogenetics Branch Intramural Research Program, National Institute of Mental Health, Bethesda, MD, United States; Tamarkin, L., Clinical Psychobiology Branch, Intramural Research Program, National Institute of Mental …	Affective illness aggregates in families and appears to be heritable. Bipolar affective patients have been found to be supersensitive to the suppressive effect of light on the nocturnal secretion of melatonin, both in ill and well states. We tested young people aged 15 to 25 years with one manic-depressive parent (n = 18), major affective disorder on both sides of the family (n = 7), and age-matc…	Affective disorder; Bipolar disorder; Circadian rhythms; Genetics; Melatonin; Neuroendocrinology	melatonin; adult; affective neurosis; family; heredity; high risk population; human; light; psychological aspect; supersensitivity; Adolescent; Adult; Biological Markers; Bipolar Disorder; Female; Human; Light; Male; Melatonin; Mood Disorders; Reference Values; Risk Factors		melatonin, 73-31-4; Biological Markers; Melatonin, 73-31-4							Nurnberger Jr., J.I.; Institute of Psychiatric Research, Department of Psychiatry, Indiana University School of Medicine, Indianapolis, IN, United States								0893133X		NEROE	3251502	English	Neuropsychopharmacology	Article	Final		Scopus	2-s2.0-0024213031	1988_Nurnberger_Supersensitivity	1988_Nurnberger_Supersensitivity.pdf	https://sci-hub.se/10.1016/0893-133X(88)90020-6	?
Nathan P.J., Burrows G.D., Norman T.R.	7102065326;7202553584;7101661686;	Melatonin sensitivity to dim white light in affective disorders	1999	Neuropsychopharmacology	21	3		408	413		82	10.1016/S0893-133X(99)00018-4	https://www.scopus.com/inward/record.uri?eid=2-s2.0-0032792869&doi=10.1016%2fS0893-133X%2899%2900018-4&partnerID=40&md5=0df83db30b9be100917aa7e771724c63	Brain Sciences Institute, Swinburne Univ. Technol., 400 B., Hawthorn, Vic. 3122, Australia; Department of Psychiatry, Univ. Melbourne, Austin R., Heidelberg, Vic. 3084, Australia	Nathan, P.J., Brain Sciences Institute, Swinburne Univ. Technol., 400 B., Hawthorn, Vic. 3122, Australia; Burrows, G.D., Department of Psychiatry, Univ. Melbourne, Austin R., Heidelberg, Vic. 3084, Australia; Norman, T.R., Department of Psychiatry, Univ. Melbourne, Austin R., Heidelberg, Vic. 3084, Australia	Both dim and bright light has been shown to suppress the nocturnal secretion of the pineal hormone melatonin. Early reports suggests that an abnormal response to light occurs in patients with bipolar affective disorder, where as patients with major depressive disorder respond similarly to controls. It has been suggested that this abnormal sensitivity of the melatonin response to light could be a …	Affective disorders; Biological marker; Circadian rhythms; Dim-light; Light-sensitivity; Melatonin; Suppression	biological marker; melatonin; adult; affective neurosis; aged; article; circadian rhythm; controlled study; depression; human; light; major clinical study; manic depressive psychosis; priority journal; retina; supersensitivity; suprachiasmatic nucleus; Adolescent; Adult; Aged; Biological Markers; Bipolar Disorder; Depressive Disorder, Major; Humans; Light; Melatonin; Middle Aged; Mood Disorders; …		Biological Markers; Melatonin, 73-31-4				Authors wish to thank the Theodore & Vada Stanley Foundation for their financial support, and Angela Komiti and Jacqueline McGrath for their assistance during the study.			Nathan, P.J.; Brain Sciences Institute, Swinburne University Technology, 400 Burwood Road, Hawthorn, Vic. 3122, Australia; email: pnathan@bsi.swin.edu.au								0893133X		NEROE	10457538	English	Neuropsychopharmacology	Article	Final	Open Access	Scopus	2-s2.0-0032792869	1999_Nathan_Melatonin	1999_Nathan_Melatonin.pdf	https://sci-hub.se/10.1016/S0893-133X(99)00018-4	Y
Lowden A., Åkerstedt T., Wibom R.	6603405293;35500389600;6701753277;	Suppression of sleepiness and melatonin by bright light exposure during breaks in night work	2004	Journal of Sleep Research	13	1		37	43		82	10.1046/j.1365-2869.2003.00381.x	https://www.scopus.com/inward/record.uri?eid=2-s2.0-1642341166&doi=10.1046%2fj.1365-2869.2003.00381.x&partnerID=40&md5=a109ff24dcad16ed1391b4bf8ac83de0	IPM - Natl. Inst. Psychosocial Med., Karolinska Institutet, Stockholm, Sweden; Department of Mechanical Engineering, Linköping University, Linköping, Sweden; IPM - Natl. Inst. Psychosocial Med., PO Box 230, 171 77 Stockholm, Sweden	Lowden, A., IPM - Natl. Inst. Psychosocial Med., Karolinska Institutet, Stockholm, Sweden, IPM - Natl. Inst. Psychosocial Med., PO Box 230, 171 77 Stockholm, Sweden; Åkerstedt, T., IPM - Natl. Inst. Psychosocial Med., Karolinska Institutet, Stockholm, Sweden; Wibom, R., Department of Mechanical Engineering, Linköping University, Linköping, Sweden	Night work is non-optimal for performance and recuperation because of a lack of circadian influence that fully promote a night orientation. Our study assessed, in an industrial setting, the effects of bright light exposure (BL) on sleepiness, sleep and melatonin, during night work and during the following readaptation to day work. In a crossover design, 18 workers at a truck production plant were…	Circadian rhythms; Shift work; Sleep	melatonin; actimetry; adaptation; adult; article; circadian rhythm; clinical article; controlled study; female; hormonal regulation; hormone determination; human; light exposure; male; night work; priority journal; rating scale; saliva level; sleep; sleep waking cycle; somnolence; task performance		melatonin, 73-31-4							Lowden, A.; IPM - Natl. Inst. Psychosocial Med., PO Box 230, 171 77 Stockholm, Sweden; email: Arne.Lowden@ipm.ki.se			Blackwell Publishing Ltd					9621105		JSRSE	14996033	English	J. Sleep Res.	Article	Final		Scopus	2-s2.0-1642341166	2004_Lowden_Suppression	2004_Lowden_Suppression.pdf	https://sci-hub.se/10.1046/j.1365-2869.2003.00381.x	Y
Sasseville A., Paquet N., Sévigny J., Hébert M.	35386963200;56673972600;35186507400;7102121577;	Blue blocker glasses impede the capacity of bright light to suppress melatonin production	2006	Journal of Pineal Research	41	1		73	78		82	10.1111/j.1600-079X.2006.00332.x	https://www.scopus.com/inward/record.uri?eid=2-s2.0-33745527043&doi=10.1111%2fj.1600-079X.2006.00332.x&partnerID=40&md5=073658b3b0eb39b5dbf6b180ba1bfbb6	Centre de Recherche Université Laval Robert-Giffard/ Département d'Ophtalmologie, United States; Centre de Recherche en Rhumatologie et Immunologie, Université Laval, Québec City, Que., Canada; Centre de Recherche Université Laval Robert-Giffard, 2601 de la Canardière, F-4500, Québec City, Que. G1J 2G3, Canada	Sasseville, A., Centre de Recherche Université Laval Robert-Giffard/ Département d'Ophtalmologie, United States; Paquet, N., Centre de Recherche Université Laval Robert-Giffard/ Département d'Ophtalmologie, United States; Sévigny, J., Centre de Recherche en Rhumatologie et Immunologie, Université Laval, Québec City, Que., Canada; Hébert, M., Centre de Recherche Université Laval Robert-Giffard/ Dé…	Blocking morning light exposure with dark goggles can contribute to the adjustment to night work but these glasses are incompatible with driving. Recently, it was discovered that the biological clock is most sensitive to short wavelengths (blue light). Therefore, we tested the hypothesis that cutting the blue portion of the light spectrum with orange lens glasses (blue blockers) would prevent the…	Light; Melatonin; Shift workers; Wavelength	melatonin; adaptation; adult; article; biological rhythm; blue light; brightness; driving ability; female; hormone synthesis; human; human experiment; light exposure; light irradiance; male; night; night work; normal human; spectacles; Adult; Eyeglasses; Female; Humans; Light; Male; Melatonin; Saliva		melatonin, 73-31-4; Melatonin, 73-31-4							Hébert, M.; Centre de Recherche Université Laval Robert-Giffard, 2601 de la Canardière, F-4500, Québec City, Que. G1J 2G3, Canada; email: marc.hebert@crulrg.ulaval.ca								7423098		JPRSE	16842544	English	J. Pineal Res.	Article	Final		Scopus	2-s2.0-33745527043	2006_Sasseville_Blue	2006_Sasseville_Blue.pdf	https://sci-hub.se/10.1111/j.1600-079X.2006.00332.x	Y
Graham C., Cook M.R., Riffle D.W., Gerkovich M.M., Cohen H.D.	55915656400;7403191303;6602518053;6603766797;7402808785;	Nocturnal melatonin levels in human volunteers exposed to intermittent 60 Hz magnetic fields	1996	Bioelectromagnetics	17	4		263	273		81	10.1002/(SICI)1521-186X(1996)17:4<263::AID-BEM2>3.0.CO;2-1	https://www.scopus.com/inward/record.uri?eid=2-s2.0-0030339257&doi=10.1002%2f%28SICI%291521-186X%281996%2917%3a4%3c263%3a%3aAID-BEM2%3e3.0.CO%3b2-1&partnerID=40&md5=acd564913a56a1d19a1aca34565821f0	Midwest Research Institute, Kansas City, MO, United States; Midwest Research Institute, 425 Volker Boulevard, Kansas City, MO 64110, United States	Graham, C., Midwest Research Institute, Kansas City, MO, United States, Midwest Research Institute, 425 Volker Boulevard, Kansas City, MO 64110, United States; Cook, M.R., Midwest Research Institute, Kansas City, MO, United States; Riffle, D.W., Midwest Research Institute, Kansas City, MO, United States; Gerkovich, M.M., Midwest Research Institute, Kansas City, MO, United States; Cohen, H.D., Mid…	Two double-blind laboratory-based studies were performed to determine whether a suppression of nocturnal melatonin similar to that observed in rodents occurs when humans are exposed to magnetic fields at night. In study 1, 33 men were exposed to sham, 10 mG, or 200 mG intermittent, circularly polarized magnetic fields from 2300 to 0700 h under controlled environmental and exposure test conditions…	Cancer; ELF; EMF; Human; Neuroendocrine	Rodentia; melatonin; adolescent; adult; animal; article; blood; circadian rhythm; clinical trial; controlled clinical trial; controlled study; double blind procedure; human; light; magnetism; male; physiology; randomized controlled trial; secretion; Adolescent; Adult; Animals; Circadian Rhythm; Double-Blind Method; Humans; Light; Magnetics; Male; Melatonin		Melatonin, 73-31-4							Graham, C.; Midwest Research Institute, 425 Volker Boulevard, Kansas City, MO 64110, United States			Wiley-Liss Inc.					1978462		BIOED	8891185	English	Bioelectromagnetics	Article	Final		Scopus	2-s2.0-0030339257	1996_Graham_Nocturnal	1996_Graham_Nocturnal.pdf	https://sci-hub.se/10.1002/(SICI)1521-186X(1996)17:4<263::AID-BEM2>3.0.CO;2-1	Y
Cajochen C., Kräuchi K., Danilenko K.V., Wirz-Justice A.	7003530216;7003651460;6602607939;7005425500;	Evening administration of melatonin and bright light: Interactions on the EEG during sleep and wakefulness	1998	Journal of Sleep Research	7	3		145	157		81	10.1046/j.1365-2869.1998.00106.x	https://www.scopus.com/inward/record.uri?eid=2-s2.0-0031687046&doi=10.1046%2fj.1365-2869.1998.00106.x&partnerID=40&md5=64286b0e588d30f9821758f48076b16f	Psychiatric University Clinic, Basel, Switzerland; Brigham Women's Hospital, Circadian, Neuroendocrine Sleep D., Harvard Medical School, 221 Longwood Avenue, Boston, MA 02115, United States; Lab. for Circadian and Sleep Disord., Medicine Brigham Women's Hospital, Harvard Medical School, Boston, MA, United States; Institute of Physiology, Siberian Branch, Russ. Acad. of Med. Sci. Novosibirsk, Russ…	Cajochen, C., Psychiatric University Clinic, Basel, Switzerland, Brigham Women's Hospital, Circadian, Neuroendocrine Sleep D., Harvard Medical School, 221 Longwood Avenue, Boston, MA 02115, United States, Lab. for Circadian and Sleep Disord., Medicine Brigham Women's Hospital, Harvard Medical School, Boston, MA, United States; Kräuchi, K., Psychiatric University Clinic, Basel, Switzerland; Danile…	Both the pineal hormone melatonin and light exposure are considered to play a major role in the circadian regulation of sleep. In a placebo- controlled balanced cross-over design, we investigated the acute effects of exogenous melatonin (5mg p.o. at 20.40 hours) with or without a 3-h bright light exposure (5000 lux from 21.00 hours-24.00 hours) on subjective sleepiness, internal sleep structure a…	Acute and phase shifting effects; Circadian rhythms; EEG spectral analysis; Sleep quality; Sleepiness	melatonin; adult; alpha rhythm; article; circadian rhythm; electroencephalogram; human; human experiment; light; male; nonrem sleep; normal human; priority journal; rem sleep; slow brain wave; slow wave sleep; somnolence; theta rhythm; wakefulness; Adult; Circadian Rhythm; Cross-Over Studies; Electroencephalography; Free Radical Scavengers; Humans; Light; Male; Melatonin; Sleep, REM; Wakefulness		Free Radical Scavengers; Melatonin, 73-31-4							Cajochen, C.; Lab. for Circadian/Sleep Disorders, Medicine Brigham Women's Hospital, Harvard Medical School, Boston, MA, United States; email: ccajochen@gcrc.bwh.harvard.edu								9621105		JSRSE	9785269	English	J. Sleep Res.	Article	Final		Scopus	2-s2.0-0031687046	1998_Cajochen_Evening	1998_Cajochen_Evening.pdf	https://sci-hub.se/10.1046/j.1365-2869.1998.00106.x	Y
Yates J.R.W.	57206944116;	Tuberous sclerosis	2006	European Journal of Human Genetics	14	10		1065	1073		80	10.1038/sj.ejhg.5201625	https://www.scopus.com/inward/record.uri?eid=2-s2.0-33749068243&doi=10.1038%2fsj.ejhg.5201625&partnerID=40&md5=0188f35a5d7c324162d24cd3e470bbb6	Department of Medical Genetics, University of Cambridge, Cambridge, United Kingdom; Cambridge Institute for Medical Research, Addenbrooke's Hospital, Box 139, Cambridge CB2 2XY, United Kingdom	Yates, J.R.W., Department of Medical Genetics, University of Cambridge, Cambridge, United Kingdom, Cambridge Institute for Medical Research, Addenbrooke's Hospital, Box 139, Cambridge CB2 2XY, United Kingdom	Tuberous sclerosis is a serious inherited disease which poses major challenges for affected families and those caring for them. Identification of the genes causing the condition and study of their protein products has shed light on the pathogenesis of the disease and provided valuable new information about signalling pathways regulating protein synthesis and cell growth. There is now the exciting…	Hamartin; Hamartoma; Mammalian target of rapamycin (mTOR); Tuberin; Tuberous sclerosis	anticonvulsive agent; central stimulant agent; corticosteroid derivative; corticotropin derivative; hamartin; immunosuppressive agent; mammalian target of rapamycin; melatonin; prednisolone; progesterone; rapamycin; tamoxifen; tuberin; tuberous sclerosis complex 1 protein; unclassified drug; vigabatrin; angiomyolipoma; article; artificial embolism; astrocytoma; attention deficit disorder; autism;…		melatonin, 73-31-4; prednisolone, 50-24-8; progesterone, 57-83-0; rapamycin, 53123-88-9; tamoxifen, 10540-29-1; vigabatrin, 60643-86-9; tuberous sclerosis complex 1 protein; tuberous sclerosis complex 2 protein, 169027-60-5; Tumor Suppressor Proteins							Yates, J.R.W.; Department of Medical Genetics, Cambridge Institute for Medical Research, Addenbrooke's Hospital, Box 139, Cambridge CB2 2XY, United Kingdom; email: jrwy1@cam.ac.uk								10184813		EJHGE	16868562	English	Eur. J. Hum. Genet.	Article	Final	Open Access	Scopus	2-s2.0-33749068243	2006_Yates_Tuberous	2006_Yates_Tuberous.pdf	https://sci-hub.se/10.1038/sj.ejhg.5201625	Y
Ralph C.L., Mull D., Lynch H.J., Hedlund L.	24612113000;7004491672;7201535161;7007107293;	A melatonin rhythm persists in rat pineals in darkness	1971	Endocrinology	89	6		1361	1366		80	10.1210/endo-89-6-1361	https://www.scopus.com/inward/record.uri?eid=2-s2.0-0015181365&doi=10.1210%2fendo-89-6-1361&partnerID=40&md5=13dd48eec834678b0d7c8f2dd4c6cdb7	Department of Biology, University of Pittsburgh, Pittsburgh, PA, 15213, United States; Department of Nutrition and Food Science, Massachusetts Institute of Technology, Cambridge, MA, United States; Department of Dairy Husbandry, University of Missouri, Columbia, MI, United States	Ralph, C.L., Department of Biology, University of Pittsburgh, Pittsburgh, PA, 15213, United States; Mull, D., Department of Biology, University of Pittsburgh, Pittsburgh, PA, 15213, United States; Lynch, H.J., Department of Biology, University of Pittsburgh, Pittsburgh, PA, 15213, United States, Department of Nutrition and Food Science, Massachusetts Institute of Technology, Cambridge, MA, United…	Male rats that were maintained in continuous darkness or blinded by enucleation exhibited circadian rhythms of wheel-running activity. Pineal bodies taken from rats that were killed during the phase of greater locomotor activity contained significantly more melatonin than the pineal bodies of rats killed during the phase of lesser activity. Thus, a rhythm of pineal melatonin content persists and …		melatonin; animal; article; biosynthesis; blindness; circadian rhythm; darkness; locomotion; male; metabolism; pineal body; rat; Animal; Blindness; Circadian Rhythm; Darkness; Locomotion; Male; Melatonin; Pineal Gland; Rats		melatonin, 73-31-4; Melatonin, 73-31-4															137227			5120636	English	Endocrinology	Article	Final		Scopus	2-s2.0-0015181365	1971_Ralph_A	1971_Ralph_A.pdf	https://sci-hub.se/10.1210/endo-89-6-1361	Y
Kennaway D.J., Voultsios A., Varcoe T.J., Moyer R.W.	7005386876;6603496031;6506626150;7102649955;	Melatonin in mice: Rhythms, response to light, adrenergic stimulation, and metabolism	2002	American Journal of Physiology - Regulatory Integrative and Comparative Physiology	282	2 51-2		R358	R365		79		https://www.scopus.com/inward/record.uri?eid=2-s2.0-0036084714&partnerID=40&md5=d3f4d0f2ca8bdf1ba00a7e9f6ee3c2d4	Department of Obstetrics and Gynaecology, Adelaide University, Medical School, Adelaide, SA 5005, Australia; Dept. of Obstetrics and Gynaecology, Adelaide Univ., Medical School, Frome Road, Adelaide, SA 5005, Australia	Kennaway, D.J., Department of Obstetrics and Gynaecology, Adelaide University, Medical School, Adelaide, SA 5005, Australia, Dept. of Obstetrics and Gynaecology, Adelaide Univ., Medical School, Frome Road, Adelaide, SA 5005, Australia; Voultsios, A., Department of Obstetrics and Gynaecology, Adelaide University, Medical School, Adelaide, SA 5005, Australia; Varcoe, T.J., Department of Obstetrics …	There has been relatively little research conducted on pineal melatonin production in laboratory mice, in part, due to the lack of appropriate assays. We studied the pineal and plasma rhythm, response to light, adrenergic stimulation, and metabolism of melatonin in CBA mice. With the use of a sensitive and specific melatonin RIA, melatonin was detected in the pineal glands at all times of the day…	6-glucuronylmelatonin; 6-sulphatoxymelatonin; Circadian rhythm; Phase shift; Pineal gland	6 glucuronylmelatonin; 6 hydroxymelatonin o sulfate; beta adrenergic receptor stimulating agent; isoprenaline; melatonin; melatonin derivative; unclassified drug; adrenergic stimulation; animal experiment; animal tissue; article; circadian rhythm; controlled study; hormone blood level; hormone determination; hormone metabolism; hormone release; hormone synthesis; male; mouse; nonhuman; photoperio…		6-sulfatoxymelatonin, 2208-40-4; Adrenergic beta-Agonists; Isoproterenol, 7683-59-2; Melatonin, 73-31-4							Kennaway, D.J.; Dept. of Obstetrics, Adelaide Univ., Medical School, Frome Road, Adelaide, SA 5005, Australia; email: david.kennaway@adelaide.edu.au								3636119		AJPRD	11792644	English	Am. J. Physiol. Regul. Integr. Comp. Physiol.	Article	Final		Scopus	2-s2.0-0036084714	2002_Kennaway_Melatonin	2002_Kennaway_Melatonin.pdf	https://sci-hub.se/	?
Roberts A.C., Martensz N.D., Hastings M.H., Herbert J.	57203201911;6701787852;35482382900;57203060260;	Changes in photoperiod alter the daily rhythms of pineal melatonin content and hypothalamic β-endorphin content and the luteinizing hormone response to naloxone in the male syrian hamster	1985	Endocrinology	117	1		141	148		79	10.1210/endo-117-1-141	https://www.scopus.com/inward/record.uri?eid=2-s2.0-0022255936&doi=10.1210%2fendo-117-1-141&partnerID=40&md5=b109896a95159a63f70de5d8441ba27c	Department of Anatomy, University of Cambridge, Cambridge, United Kingdom	Roberts, A.C., Department of Anatomy, University of Cambridge, Cambridge, United Kingdom; Martensz, N.D., Department of Anatomy, University of Cambridge, Cambridge, United Kingdom; Hastings, M.H., Department of Anatomy, University of Cambridge, Cambridge, United Kingdom; Herbert, J., Department of Anatomy, University of Cambridge, Cambridge, United Kingdom	This study examines the possible involvement of β-endorphin in the photoperiodic control of reproduction in the Syrian hamster. β-Endorphin and LHRH concentrations in the medial basal hypothalamus (MBH), anterior hypothalamus (AHA), and the preoptic area (POA) as well as pineal melatonin content were determined by RIA in male Syrian hamsters exposed to either a long day [(LD) 16-h light; 8-h dark…		beta endorphin; gonadorelin; luteinizing hormone; naloxone; animal experiment; anterior hypothalamus; central nervous system; circadian rhythm; drug efficacy; endocrine system; hypothalamus; intravenous drug administration; nonhuman; photoperiodicity; preoptic area; priority journal; Animal; beta-Endorphin; Circadian Rhythm; Endorphins; Gonadorelin; Hamsters; Hypothalamus; Hypothalamus, Anterior;…		beta endorphin, 59887-17-1; gonadorelin, 33515-09-2, 9034-40-6; luteinizing hormone, 39341-83-8, 9002-67-9; naloxone, 357-08-4, 465-65-6; beta-Endorphin, 60617-12-1; Endorphins; Gonadorelin, 33515-09-2; Luteinizing Hormone, 9002-67-9; Melatonin, 73-31-4; Naloxone, 465-65-6		sigma, United Kingdom					Herbert, J.; Department of Anatomy, University of Cambridge, Downing Street, Cambridge, CB2 3DY, United Kingdom								137227			3159563	English	Endocrinology	Article	Final		Scopus	2-s2.0-0022255936	1985_Roberts_Changes	1985_Roberts_Changes.pdf	https://sci-hub.se/10.1210/endo-117-1-141	Y
Kayumov L., Casper R.F., Hawa R.J., Perelman B., Chung S.A., Sokalsky S., Shapiro C.M.	6603362297;55558468700;6506109851;57122576600;7404292430;8362367500;7102469663;	Blocking low-wavelength light prevents nocturnal melatonin suppression with no adverse effect on performance during simulated shift work	2005	Journal of Clinical Endocrinology and Metabolism	90	5		2755	2761		78	10.1210/jc.2004-2062	https://www.scopus.com/inward/record.uri?eid=2-s2.0-18844459886&doi=10.1210%2fjc.2004-2062&partnerID=40&md5=0d1697579f8551e42dc103f7a0bb1c17	Sleep Research Laboratory, University Health Network, Toronto, Ont. M5T 2S8, Canada; Department of Psychiatry, University of Toronto, Toronto, Ont. M5T 2Z9, Canada; Department of Obstetrics, University of Toronto, Toronto, Ont. M5T 2Z9, Canada; Department of Ophthalmology, University of Toronto, Toronto, Ont. M5T 2Z9, Canada; Department of Psychiatry, University Health Network, ECW 3D-035, 399 Ba…	Kayumov, L., Sleep Research Laboratory, University Health Network, Toronto, Ont. M5T 2S8, Canada, Department of Psychiatry, University of Toronto, Toronto, Ont. M5T 2Z9, Canada, Department of Psychiatry, University Health Network, ECW 3D-035, 399 Bathurst Street, Toronto, Ont. M5T 2S8, Canada; Casper, R.F., Department of Obstetrics, University of Toronto, Toronto, Ont. M5T 2Z9, Canada; Hawa, R.J.…	Decreases in melatonin production in human and animals are known to be caused by environmental lighting, especially short-wavelength lighting (between 470 and 525 nm). We investigated the novel hypothesis that the use of goggles with selective exclusion of all wavelengths less than 530 nm could prevent the suppression of melatonin in bright-light conditions during a simulated shift-work experimen…		melatonin; adult; alertness; article; brightness; controlled study; female; filtration; hormone inhibition; human; human experiment; hypothesis; light; male; measurement; normal human; performance; prevention; priority journal; saliva analysis; self report; shift worker; simulation; somnolence; spectral sensitivity; Adult; Circadian Rhythm; Female; Humans; Light; Male; Melatonin; Work Schedule To…		melatonin, 73-31-4; Melatonin, 73-31-4							Kayumov, L.; Department of Psychiatry, University Health Network, ECW 3D-035, 399 Bathurst Street, Toronto, Ont. M5T 2S8, Canada; email: lkayumov@uhnres.utoronto.ca								0021972X		JCEMA	15713707	English	J. Clin. Endocrinol. Metab.	Article	Final	Open Access	Scopus	2-s2.0-18844459886	2005_Kayumov_Blocking	2005_Kayumov_Blocking.pdf	https://sci-hub.se/10.1210/jc.2004-2062	Y
Jimerson D.C., Lynch H.J., Post R.M., Wurtman R.J., Bunney Jr. W.E.	7005355407;7201535161;7202218145;7203087223;7006685206;	Urinary melatonin rhythms during sleep deprivation in depressed patients and normals	1977	Life Sciences	20	9		1501	1508		77	10.1016/0024-3205(77)90441-6	https://www.scopus.com/inward/record.uri?eid=2-s2.0-0017727830&doi=10.1016%2f0024-3205%2877%2990441-6&partnerID=40&md5=3183614557d8815ff7e5809cc448e904	Section on Psychobiology, Adult Psychiatry Branch National Insitute of Mental Health Bethesda, MD 20014, United States; Laboratory of Neuroendocrine Regulation Department of Nutrition, Food Science Massachusetts Institute of Technology Cambridge, MA 02139, United States	Jimerson, D.C., Section on Psychobiology, Adult Psychiatry Branch National Insitute of Mental Health Bethesda, MD 20014, United States; Lynch, H.J., Laboratory of Neuroendocrine Regulation Department of Nutrition, Food Science Massachusetts Institute of Technology Cambridge, MA 02139, United States; Post, R.M., Section on Psychobiology, Adult Psychiatry Branch National Insitute of Mental Health B…	Melatonin excretion was measured in 8 hour urine aliquots for eight healthy controls and six depressed patients. Both groups had similar diurnal rhythms, with increased melatonin excretion during the night. When subjects were sleep deprived, remaining awake and active in continuous light from 7 a.m. one morning until 11 p.m. the following day, the diurnal rhythm in melatonin excretion remained un…		melatonin; depression; major clinical study; sleep deprivation; theoretical study; urine; Adult; Aged; Circadian Rhythm; Depression; Electroencephalography; Female; Humans; Lighting; Male; Melatonin; Middle Aged; Sleep Deprivation		melatonin, 73-31-4; Melatonin, 73-31-4			Metropolitan Museum of Art: NGR-22-009-627 National Aeronautics and Space Administration	Urinary melatonin excretion was measured in six healthy adult volunteers (4 males and 2 females, age range 19-65), and in six moderately to severely depressed patients (1 male and 5 females, age range 19-50) who met research I Supported by Grant NGR-22-009-627 from the National Aeronautics and Space Administration .			Jimerson, D.C.; Section on Psychobiology, Adult Psychiatry Branch National Insitute of Mental Health Bethesda, MD 20014, United States								243205		LIFSA	559896	English	Life Sci.	Article	Final		Scopus	2-s2.0-0017727830	1977_Jimerson_Urinary	1977_Jimerson_Urinary.pdf	https://sci-hub.se/10.1016/0024-3205(77)90441-6	Y
Perrin F., Peigneux P., Fuchs S., Verhaeghe S., Laureys S., Middleton B., Degueldre C., Del Fiore G., Vandewalle G., Balteau E., Poirrier R., Moreau V., Luxen A., Maquet P., Dijk D.-J.	7006412374;7003878030;7202421366;35609279700;7004546122;7102750967;7006001099;6701408370;23029331200;23090294600;55883374500;7003615050;26643600600;7006476205;7007018167;	Nonvisual responses to light exposure in the human brain during the Circadian night	2004	Current Biology	14	20		1842	1846		77	10.1016/j.cub.2004.09.082	https://www.scopus.com/inward/record.uri?eid=2-s2.0-6944237413&doi=10.1016%2fj.cub.2004.09.082&partnerID=40&md5=1487d276cecca7e5b680fce549413f66	Centre de Recherches du Cyclotron, Université de Liège, Sart Tilman, 4000, Liège, Belgium; Neurosci. et Syst. Sensoriels, Unité Mixte de Recherche 5020, Univ. Claude Bernard Lyon 1 - C., Lyon, France; Surrey Sleep Research Centre, University of Surrey, GU2 7XP, Guildford, United Kingdom; Département de Neurologie, Centre Hospitalier Universitaire, Sart Tilman, 4000, Liège, Belgium; Département de…	Perrin, F., Centre de Recherches du Cyclotron, Université de Liège, Sart Tilman, 4000, Liège, Belgium, Neurosci. et Syst. Sensoriels, Unité Mixte de Recherche 5020, Univ. Claude Bernard Lyon 1 - C., Lyon, France; Peigneux, P., Centre de Recherches du Cyclotron, Université de Liège, Sart Tilman, 4000, Liège, Belgium; Fuchs, S., Centre de Recherches du Cyclotron, Université de Liège, Sart Tilman, 4…	The brain processes light information to visually represent the environment but also to detect changes in ambient light level. The latter information induces non-image-forming responses and exerts powerful effects on physiology such as synchronization of the circadian clock and suppression of melatonin [1, 2, 3]. In rodents, irradiance information is transduced from a discrete subset of photosens…		melatonin; adult; analysis of variance; article; attention; auditory stimulation; blood; blood flow; brain; comparative study; human; light; metabolism; nuclear magnetic resonance imaging; photostimulation; physiology; positron emission tomography; radiation exposure; vascularization; Acoustic Stimulation; Adult; Analysis of Variance; Attention; Brain; Humans; Light; Magnetic Resonance Imaging; M…		melatonin, 73-31-4; Melatonin, 73-31-4			Université de Liège: P5/04 Trust-GR069714MA Fonds National de la Recherche Luxembourg: 3.4538.02	The authors thank P. Hawotte, J.-L. Genon, C. Mesters, and G. Hodiaumont for technical assistance and S. Archer for comments on the manuscript. The study was supported by the Belgian FNRS (Fonds National de la Recherche Scientifique, Belgique) (grant: 3.4538.02), the Fondation Médicale Reine Elisabeth, the Research Fund of Université de Liège (Ulg), the PAI/IAP Interuniversity Pole of Attraction …			Maquet, P.; Centre de Recherches du Cyclotron, Université de Liège, Sart Tilman, 4000, Liège, Belgium; email: pmaquet@ulg.ac.be								9609822		CUBLE	15498492	English	Curr. Biol.	Article	Final	Open Access	Scopus	2-s2.0-6944237413	2004_Perrin_Nonvisual	2004_Perrin_Nonvisual.pdf	https://sci-hub.se/10.1016/j.cub.2004.09.082	Y
Boatright J.H., Rubim N.M., Iuvone P.M.	7004754996;6506410724;55667111200;	Regulation of endogenous dopamine release in amphibian retina by melatonin: The role of gaba	1994	Visual Neuroscience	11	5		1013	1018		77	10.1017/S0952523800003941	https://www.scopus.com/inward/record.uri?eid=2-s2.0-0028500588&doi=10.1017%2fS0952523800003941&partnerID=40&md5=264a1a1032dcac4f4d796b1f028e9efa	Department of Pharmacology and The Neuroscience Training Program, Emory University School of Medicine, Atlanta, United States	Boatright, J.H., Department of Pharmacology and The Neuroscience Training Program, Emory University School of Medicine, Atlanta, United States; Rubim, N.M., Department of Pharmacology and The Neuroscience Training Program, Emory University School of Medicine, Atlanta, United States; Iuvone, P.M., Department of Pharmacology and The Neuroscience Training Program, Emory University School of Medicine…	In the retina of the African clawed frog (Xenopus laevis), endogenous dopamine release increases in light and decreases in darkness. Exogenous melatonin and several chemical analogs of melatonin suppressed light-evoked dopamine release from frog retina in a concentration-dependent manner. The rank order of potency for inhibition of light-evoked dopamine release was melatonin » 5-methoxytryptamine…	Dopamine; Gamma-aminobutyric acid; Melatonin; Retina	4 aminobutyric acid; 4 aminobutyric acid receptor; bicuculline; dopamine; drug derivative; melatonin; picrotoxin; animal; article; dark adaptation; dose response; drug effect; light; male; metabolism; physiology; retina; Xenopus laevis; Animal; Bicuculline; Dark Adaptation; Dopamine; Dose-Response Relationship, Drug; gamma-Aminobutyric Acid; Light; Male; Melatonin; Picrotoxin; Receptors, GABA; Re…		4 aminobutyric acid, 28805-76-7, 56-12-2; bicuculline, 485-49-4; dopamine, 51-61-6, 62-31-7; melatonin, 73-31-4; picrotoxin, 124-87-8; Bicuculline, 485-49-4; Dopamine, 51-61-6; gamma-Aminobutyric Acid, 56-12-2; Melatonin, 73-31-4; Picrotoxin, 124-87-8; Receptors, GABA			National Institutes of Health: RO1-EY04864 Sigma Xi	The authors would like to thank Drs. J. Besharse, G. Cahill, M. Pierce, K.B. Thomas, and J. Zawilska for meaningful discussions and suggestions on the above work. Supported by NIH Grant RO1-EY04864, a predoctoral fellowship to J.H. Boatright from the Pharmaceutical Manufacturer's Association Foundation, and a Grant-in-Aid from Sigma Xi. Preliminary reports of some of these data were published in …											9525238			7947394	English	Vis. Neurosci.	Article	Final		Scopus	2-s2.0-0028500588	1994_Boatright_Regulation	1994_Boatright_Regulation.pdf	https://sci-hub.se/10.1017/S0952523800003941	Y
Charman W.N.	7102355014;	Age, lens transmittance, and the possible effects of light on melatonin suppression	2003	Ophthalmic and Physiological Optics	23	2		181	187		76	10.1046/j.1475-1313.2003.00105.x	https://www.scopus.com/inward/record.uri?eid=2-s2.0-0038313079&doi=10.1046%2fj.1475-1313.2003.00105.x&partnerID=40&md5=03acadbc811c66a909fa715369d9d5f9	Department of Optometry and Neuroscience, UMIST, Manchester, United Kingdom; Department of Optometry and Neuroscience, UMIST, PO Box 88, Manchester M60 1QD, United Kingdom	Charman, W.N., Department of Optometry and Neuroscience, UMIST, Manchester, United Kingdom, Department of Optometry and Neuroscience, UMIST, PO Box 88, Manchester M60 1QD, United Kingdom	Recently it has been suggested that a previously undetected, rhodopsin-based, visual pigment, located in some retinal ganglion cells and having a peak sensitivity around 460 nm, may be responsible for light-induced melatonin suppression and, perhaps, maintenance of the circadian rhythm. Using data from the literature, it is shown that, as absorption in the crystalline lens for shorter visible wav…	Age; Circadian rhythms; Lens; Melatonin; Visual pigment	melatonin; visual pigment; melatonin; age; article; circadian rhythm; controlled study; hormone inhibition; human; human tissue; lens; light exposure; medical literature; priority journal; pupil; retina ganglion cell; aging; circadian rhythm; cornea; physiology; retina; Aging; Circadian Rhythm; Cornea; Humans; Lens, Crystalline; Melatonin; Pupil; Retina		melatonin, 73-31-4; Melatonin, 73-31-4							Charman, W.N.; Department of Optometry and Neuroscience, UMIST, PO Box 88, Manchester M60 1QD, United Kingdom; email: neil.charman@umist.ac.uk								2755408		OPOPD	12641706	English	Ophthalmic Physiol. Opt.	Article	Final		Scopus	2-s2.0-0038313079	2003_Charman_Age,	2003_Charman_Age,.pdf	https://sci-hub.se/10.1046/j.1475-1313.2003.00105.x	Y
Burch J.B., Reif J.S., Yost M.G., Keefe T.J., Pitrat C.A.	7201814557;7102293315;7007013921;7005479448;6506258300;	Reduced excretion of a melatonin metabolite in workers exposed to 60 Hz magnetic fields	1999	American Journal of Epidemiology	150	1		27	36		76	10.1093/oxfordjournals.aje.a009914	https://www.scopus.com/inward/record.uri?eid=2-s2.0-0033168216&doi=10.1093%2foxfordjournals.aje.a009914&partnerID=40&md5=b72d0034fca9b0a24925a21a976296ea	Department of Environmental Health, Colorado State University, Fort Collins, CO, United States; Department of Environmental Health, University of Washington, Seattle, WA, United States; Department of Environmental Health, Colorado State University, Fort Collins, CO 80523, United States	Burch, J.B., Department of Environmental Health, Colorado State University, Fort Collins, CO, United States, Department of Environmental Health, Colorado State University, Fort Collins, CO 80523, United States; Reif, J.S., Department of Environmental Health, Colorado State University, Fort Collins, CO, United States; Yost, M.G., Department of Environmental Health, University of Washington, Seattl…	The effects of occupational 60 Hz magnetic field and ambient light exposures on the pineal hormone, melatonin, were studied in 142 male electric utility workers in Colorado, 1995-1996. Melatonin was assessed by radioimmunoassay of its metabolite, 6-hydroxymelatonin sulfate (6-OHMS), in post-work shift urine samples. Personal magnetic field and light exposures were measured over 3 consecutive days…	6-hydroxymelatonin sulfate; Electricity; Electromagnetic fields; Pineal body	creatinine; melatonin; adult; article; human; light exposure; magnetic field; metabolite; occupational exposure; radioimmunoassay; urinalysis		creatinine, 19230-81-0, 60-27-5; melatonin, 73-31-4			19X-SS755V, 1 R01ES08117 National Institute of Environmental Health Sciences National Institutes of Health	This work was supported by the US Department of Energy, Office of Energy Management under contract no. 19X-SS755V with Martin Marietta Corporation and by research grant no. 1 R01ES08117 from the National Institute of Environmental Health Sciences, National Institutes of Health.			Burch, J.B.; Department of Environmental Health, Colorado State University, Fort Collins, CO 80523, United States			John Hopkins University School of Hygiene and Public Health					29262		AJEPA	10400550	English	Am. J. Epidemiol.	Article	Final		Scopus	2-s2.0-0033168216	1999_Burch_Reduced	1999_Burch_Reduced.pdf	https://sci-hub.se/10.1093/oxfordjournals.aje.a009914	Y
Dauchy R.T., Xiang S., Mao L., Brimer S., Wren M.A., Yuan L., Anbalagan M., Hauch A., Frasch T., Rowan B.G., Blask D.E., Hill S.M.	7004364685;24173887600;24173817200;56310201300;55908155700;57031094000;14053536300;46761086400;25227189800;7004334425;7006151595;7402766036;	Circadian and melatonin disruption by exposure to light at night drives intrinsic resistance to tamoxifen therapy in breast cancer	2014	Cancer Research	74	15		4099	4110		76	10.1158/0008-5472.CAN-13-3156	https://www.scopus.com/inward/record.uri?eid=2-s2.0-84905501655&doi=10.1158%2f0008-5472.CAN-13-3156&partnerID=40&md5=b4bb3815d0831e8630fb6b44b1db0e36	Department of Structural and Cellular Biology, Tulane University, School of Medicine, 1430 Tulane Avenue, SL-49, New Orleans, LA 70112, United States; Department of Surgery, Tulane University, School of Medicine, New Orleans, LA, United States; Department of Tulane Cancer Center, Louisiana Cancer Research Consortium, New Orleans, LA, United States; Department of Tulane Circadian Cancer, Biology G…	Dauchy, R.T., Department of Structural and Cellular Biology, Tulane University, School of Medicine, 1430 Tulane Avenue, SL-49, New Orleans, LA 70112, United States, Department of Tulane Circadian Cancer, Biology Group, New Orleans, LA, United States; Xiang, S., Department of Structural and Cellular Biology, Tulane University, School of Medicine, 1430 Tulane Avenue, SL-49, New Orleans, LA 70112, U…	Resistance to endocrine therapy is a major impediment to successful treatment of breast cancer. Preclinical and clinical evidence links resistance to antiestrogen drugs in breast cancer cells with the overexpression and/or activation of various pro-oncogenic tyrosine kinases. Disruption of circadian rhythms by night shift work or disturbed sleep-wake cycles may lead to an increased risk of breast…		melatonin; tamoxifen; antineoplastic hormone agonists and antagonists; melatonin; tamoxifen; animal cell; animal experiment; animal model; apoptosis; article; breast cancer; breast carcinogenesis; cancer chemotherapy; cancer growth; cancer resistance; cancer risk; cell proliferation; cell survival; circadian rhythm; controlled study; disease association; female; human; light dark cycle; mouse; no…		melatonin, 73-31-4; tamoxifen, 10540-29-1; Antineoplastic Agents, Hormonal; Melatonin; Tamoxifen			National Institutes of Health, NIH: R21CA129875-04				Frasch, T.; Department of Structural and Cellular Biology, Tulane University, School of Medicine, 1430 Tulane Avenue, SL-49, New Orleans, LA 70112, United States; email: tfrasch@tulane.edu			American Association for Cancer Research Inc.					85472		CNREA	25062775	English	Cancer Res.	Article	Final	Open Access	Scopus	2-s2.0-84905501655	2014_Dauchy_Circadian	2014_Dauchy_Circadian.pdf	https://sci-hub.se/10.1158/0008-5472.CAN-13-3156	Y
Zatz M., Mullen D.A.	7102320500;7005202931;	Norepinephrine, acting via adenylate cyclase, inhibits melatonin output but does not phase-shift the pacemaker in cultured chick pineal cells	1988	Brain Research	450	2019-02-01		137	143		75	10.1016/0006-8993(88)91553-3	https://www.scopus.com/inward/record.uri?eid=2-s2.0-0023935825&doi=10.1016%2f0006-8993%2888%2991553-3&partnerID=40&md5=10f090ea2734734c0a5e057ed6fb1031	Laboratory of Cell Biology, NIMH, Bethesda, MD 20892, United States	Zatz, M., Laboratory of Cell Biology, NIMH, Bethesda, MD 20892, United States; Mullen, D.A., Laboratory of Cell Biology, NIMH, Bethesda, MD 20892, United States	We have recently described a system, using dispersed chick pineal cells in static culture, which displays a persistent, photosensitive, circadian rhythm of melatonin release, and the effects of light upon it. Here we describe the effects of norepinephrine (NE) on melatonin output by these cells. NE inhibited noctural melatonin release; it was potent and effective. Pertussis toxin, forskolin, or 8…	Circadian rhythm; Entrainment; α2-Adrenergic receptor	8 bromo cyclic amp; adenylate cyclase; alpha 2 adrenergic receptor; forskolin; melatonin; noradrenalin; pertussis toxin; radioisotope; animal cell; cell culture; chicken; circadian rhythm; newborn; nonhuman; pineal body; priority journal; 8-Bromo Cyclic Adenosine Monophosphate; Adenylate Cyclase; Animal; Cells, Cultured; Chickens; Circadian Rhythm; Forskolin; Lighting; Melatonin; Norepinephrine; …		8 bromo cyclic AMP, 23583-48-4; adenylate cyclase, 9012-42-4; forskolin, 66575-29-9; melatonin, 73-31-4; noradrenalin, 1407-84-7, 51-41-2; pertussis toxin, 70323-44-3; 8-Bromo Cyclic Adenosine Monophosphate, 23583-48-4; Adenylate Cyclase, EC 4.6.1.1; Forskolin, 66428-89-5; Melatonin, 73-31-4; Norepinephrine, 51-41-2		calbiochem, United States; list, United States; sigma, United States					Zatz, M.; Laboratory of Cell Biology, NIMH, Bethesda, MD 20892, United States								68993		BRREA	3401707	English	Brain Res.	Article	Final		Scopus	2-s2.0-0023935825	1988_Zatz_Norepinephrine,	1988_Zatz_Norepinephrine,.pdf	https://sci-hub.se/10.1016/0006-8993(88)91553-3	Y
Iigo M., Kezuka H., Aida K., Hanyu I.	56274143500;7003646281;35498027200;7003307466;	Circadian rhythms of melatonin secretion from superfused goldfish (Carassius auratus) pineal glands in vitro	1991	General and Comparative Endocrinology	83	1		152	158		74	10.1016/0016-6480(91)90115-M	https://www.scopus.com/inward/record.uri?eid=2-s2.0-0025799387&doi=10.1016%2f0016-6480%2891%2990115-M&partnerID=40&md5=a9232252608b213cca2a2e9b35b04d56	Department of Fisheries, Faculty of Agriculture, The University of Tokyo, Bunkyo, Tokyo, 113, Japan	Iigo, M., Department of Fisheries, Faculty of Agriculture, The University of Tokyo, Bunkyo, Tokyo, 113, Japan; Kezuka, H., Department of Fisheries, Faculty of Agriculture, The University of Tokyo, Bunkyo, Tokyo, 113, Japan; Aida, K., Department of Fisheries, Faculty of Agriculture, The University of Tokyo, Bunkyo, Tokyo, 113, Japan; Hanyu, I., Department of Fisheries, Faculty of Agriculture, The …	A flow-through, whole-organ culture (superfusion) system was developed, and goldfish pineal glands were maintained at 25° under light-dark (LD) 12:12 cycles, reversed LD 12:12 cycles, continuous dark (DD), or continuous light (LL) conditions for 48 hr. Under LD 12:12 and reversed LD 12:12 cycles, superfused pineal glands showed a rhythmic melatonin secretion: Scotophase was associated with high t…		melatonin; animal tissue; article; circadian rhythm; controlled study; goldfish; male; nonhuman; photoperiodicity; pineal body; priority journal; Animal; Biological Clocks; Circadian Rhythm; Goldfish; Melatonin; Organ Culture; Pineal Gland; Radioimmunoassay; Support, Non-U.S. Gov't		Melatonin, 73-31-4			Ministry of Agriculture, Forestry and Fisheries	We express our thanks to M. N. Wilder. Department of Agriculture, The University of Tokyo, for reading the manuscript. This study was supported in part by a grant-in-aid (Bio Media Program 90-H-2-4) from the Ministry of Agriculture, Forestry. and Fisheries.			Iigo, M.; Department of Fisheries, Faculty of Agriculture, The University of Tokyo, Bunkyo, Tokyo, 113, Japan								166480		GCENA	1879667	English	Gen. Comp. Endocrinol.	Article	Final		Scopus	2-s2.0-0025799387	1991_Iigo_Circadian	1991_Iigo_Circadian.pdf	https://sci-hub.se/10.1016/0016-6480(91)90115-M	Y
Wright Jr. K.P., Badia P., Myers B.L., Plenzler S.C., Hakel M.	7403324944;7004994249;14322286400;6507556731;6603389626;	Caffeine and light effects on nighttime melatonin and temperature levels in sleep-deprived humans	1997	Brain Research	747	1		78	84		74	10.1016/S0006-8993(96)01268-1	https://www.scopus.com/inward/record.uri?eid=2-s2.0-0342762064&doi=10.1016%2fS0006-8993%2896%2901268-1&partnerID=40&md5=abc64c470deb7977c6365432bddc4762	Department of Psychology, Bowling Green State University, Bowling Green, OH, United States	Wright Jr., K.P., Department of Psychology, Bowling Green State University, Bowling Green, OH, United States; Badia, P., Department of Psychology, Bowling Green State University, Bowling Green, OH, United States; Myers, B.L., Department of Psychology, Bowling Green State University, Bowling Green, OH, United States; Plenzler, S.C., Department of Psychology, Bowling Green State University, Bowling…	The effects of caffeine ingestion and exposure to bright light, both separately and in combination, on salivary melatonin and tympanic temperature were assessed in humans. Four treatments during a 45.5 h sleep deprivation period were compared: Dim Light-Placebo, Dim Light-Caffeine, Bright Light-Placebo and Bright-Light Caffeine. The Dim Light-Caffeine condition (200 mg twice each night) relative …	adenosine; bright light; caffeine; circadian rhythm; melatonin; sleep deprivation; temperature	caffeine; melatonin; adult; article; body temperature; circadian rhythm; controlled study; hormone blood level; human; human experiment; male; normal human; priority journal; sleep deprivation; Adolescent; Adult; Body Temperature; Caffeine; Central Nervous System Stimulants; Depression, Chemical; Humans; Light; Male; Melatonin; Sleep Deprivation		Caffeine, 58-08-2; Central Nervous System Stimulants; Melatonin, 73-31-4		alva amco pharmacal, United States	Ohio Board of Regents U.S. Army Institute of Surgical Research: MDA 903-93-K-0002	We thank the laboratory technician, L. Santiago and the research assistants, M. Boecker, M. Cochran, J. Ginzler, T. Hawkins, N. Knippen, L. Selden, A. White, W. Wojdak, M. Woodruff. This work was supported by the Army Research Institute, Contract MDA 903-93-K-0002 and from an Ohio Board of Regents Selective Excellence Program.			Wright Jr., K.P.; Department of Psychology, Bowling Green State University, Bowling Green, OH, United States								68993		BRREA	9042530	English	BRAIN RES.	Article	Final		Scopus	2-s2.0-0342762064	1997_Wright_Caffeine	1997_Wright_Caffeine.pdf	https://sci-hub.se/10.1016/S0006-8993(96)01268-1	Y
Tosini G., Dirden J.C.	7003725273;6508266060;	Dopamine inhibits melatonin release in the mammalian retina: In vitro evidence	2000	Neuroscience Letters	286	2		119	122		74	10.1016/S0304-3940(00)01117-4	https://www.scopus.com/inward/record.uri?eid=2-s2.0-0034595715&doi=10.1016%2fS0304-3940%2800%2901117-4&partnerID=40&md5=3d3262bda01247e291813ae9b8aa8447	Neuroscience Institute, Morehouse Sch. Med., 720 Westview D., Atlanta, GA 30310-1495, United States	Tosini, G., Neuroscience Institute, Morehouse Sch. Med., 720 Westview D., Atlanta, GA 30310-1495, United States; Dirden, J.C., Neuroscience Institute, Morehouse Sch. Med., 720 Westview D., Atlanta, GA 30310-1495, United States	A circadian oscillator located within the retina controls melatonin synthesis in the retina of mammals. In non-mammalian vertebrates retinal melatonin and dopamine appear to act as mutually inhibitory paracrine signals for night and day, respectively; while in mammals this mutually inhibitory capability has now been fully demonstrated. In this study using a flow-through culture apparatus we inves…	Dopamine; Dopamine receptors; Hamster; Melatonin; Retina	dopamine; dopamine 1 receptor; dopamine 5 receptor; melatonin; animal experiment; animal tissue; article; circadian rhythm; controlled study; hamster; hormone release; in vitro study; light dark cycle; male; nonhuman; priority journal; retina; Animals; Cardiotonic Agents; Cells, Cultured; Circadian Rhythm; Cricetinae; Dopamine; Dopamine Agonists; Dopamine Antagonists; Male; Melatonin; Mesocricetu…		Cardiotonic Agents; Dopamine Agonists; Dopamine Antagonists; Dopamine, 51-61-6; Melatonin, 73-31-4; Receptors, Dopamine							Tosini, G.; Neuroscience Institute, Morehouse School of Medicine, 720 Westview Drive SW, Atlanta, GA 30310-1495, United States; email: tosinig@msm.edu								3043940		NELED	10825651	English	Neurosci. Lett.	Article	Final		Scopus	2-s2.0-0034595715	2000_Tosini_Dopamine	2000_Tosini_Dopamine.pdf	https://sci-hub.se/10.1016/S0304-3940(00)01117-4	Y
Lucas R.J., Freedman M.S., Lupi D., Munoz M., David-Gray Z.K., Foster R.G.	7201704107;7203068603;6603199336;22135300300;6603428153;7402462300;	Identifying the photoreceptive inputs to the mammalian circadian system using transgenic and retinally degenerate mice	2001	Behavioural Brain Research	125	2019-02-01		97	102		73	10.1016/S0166-4328(01)00274-1	https://www.scopus.com/inward/record.uri?eid=2-s2.0-0035829369&doi=10.1016%2fS0166-4328%2801%2900274-1&partnerID=40&md5=d9f28b93b5cd0413cc5eec31fa6712e6	Department of Integrative and Molecular Neuroscience, Division of Neuroscience, Faculty of Medicine, Imperial College, Charing Cross Campus, St Dunstans Road, London W6 8RF, United Kingdom	Lucas, R.J., Department of Integrative and Molecular Neuroscience, Division of Neuroscience, Faculty of Medicine, Imperial College, Charing Cross Campus, St Dunstans Road, London W6 8RF, United Kingdom; Freedman, M.S., Department of Integrative and Molecular Neuroscience, Division of Neuroscience, Faculty of Medicine, Imperial College, Charing Cross Campus, St Dunstans Road, London W6 8RF, United…	The endogenous circadian clock of mammals retains synchrony with the external light:dark cycle through ocular photoreceptors. To date the identity of the photoreceptors responsible for mediating this response is unknown. This review outlines attempts using transgenic mouse models to address this deficit. Mice bearing specific inherited lesions of both rod and cone photoreceptors retain circadian …	Circadian rhythms; Light; Mice; Photoentrainment; Photoreceptors; Pineal; Retina	melatonin; circadian rhythm; conference paper; light dark cycle; nonhuman; photoreceptor; photosensitivity; pineal body; priority journal; retina cone; retina degeneration; retina rod; transgenic mouse; Animals; Circadian Rhythm; Melatonin; Mice; Mice, Transgenic; Phenotype; Photoreceptors; Pineal Gland; Retinal Degeneration; Retinal Pigments; Suprachiasmatic Nucleus		Melatonin, 73-31-4; Retinal Pigments															1664328			11682100	English	Behav. Brain Res.	Article	Final		Scopus	2-s2.0-0035829369	2001_Lucas_Identifying	2001_Lucas_Identifying.pdf	https://sci-hub.se/10.1016/S0166-4328(01)00274-1	Y
Dauchy R.T., Blask D.E., Sauer L.A., Brainard G.C., Krause J.A.	7004364685;7006151595;7004486514;7003540124;7202955193;	Dim light during darkness stimulates tumor progression by enhancing tumor fatty acid uptake and metabolism	1999	Cancer Letters	144	2		131	136		73	10.1016/S0304-3835(99)00207-4	https://www.scopus.com/inward/record.uri?eid=2-s2.0-0032874387&doi=10.1016%2fS0304-3835%2899%2900207-4&partnerID=40&md5=5ad8dbb345e36ef3ec4ce399569d78da	Bassett Research Institute, Mary Imogene Bassett Hosp., 1 A., Cooperstown, NY 13326, United States; Department of Neurology, Jefferson Med. Coll., Thomas J., Philadelphia, PA 19107, United States	Dauchy, R.T., Bassett Research Institute, Mary Imogene Bassett Hosp., 1 A., Cooperstown, NY 13326, United States; Blask, D.E., Bassett Research Institute, Mary Imogene Bassett Hosp., 1 A., Cooperstown, NY 13326, United States; Sauer, L.A., Bassett Research Institute, Mary Imogene Bassett Hosp., 1 A., Cooperstown, NY 13326, United States; Brainard, G.C., Department of Neurology, Jefferson Med. Col…	Tumor linoleic acid uptake and metabolism, and growth are suppressed by melatonin, the synthesis of which is inhibited by light. Linoleic acid, via its mitogenic metabolite 13-hydroxyoctadecadienoic acid (13-HODE) is an important growth stimulant of rat hepatoma 7288CTC. Here we compared the effects of an alternating light:dark cycle (12L:12D), dim light (0.25 lux) present during the dark phase o…	Hepatoma; Light; Linoleic acid; Melatonin; Pineal	fatty acid; linoleic acid; melatonin; article; controlled study; darkness; fatty acid metabolism; fatty acid transport; hormone release; light; light dark cycle; liver cell carcinoma; male; metabolite; nonhuman; pineal body; priority journal; rat; tumor growth; Animals; Cell Division; Darkness; Disease Progression; Light; Linoleic Acid; Linoleic Acids; Male; Melatonin; Rats; Rats, Inbred BUF		13-hydroxy-9,11-octadecadienoic acid, 5204-88-6; Linoleic Acid, 2197-37-7; Linoleic Acids; Melatonin, 73-31-4							Blask, D.E.; Bassett Research Institute, Mary Imogene Bassett Hospital, 1 Atwell Road, Cooperstown, NY 13326, United States; email: dblask@usa.net								3043835		CALED	10529012	English	Cancer Lett.	Article	Final		Scopus	2-s2.0-0032874387	1999_Dauchy_Dim	1999_Dauchy_Dim.pdf	https://sci-hub.se/10.1016/S0304-3835(99)00207-4	Y
Wayne N.L., Malpaux B., Karsch F.J.	7003320528;7005437574;7101883690;	How does melatonin code for day length in the ewe: duration of nocturnal melatonin release or coincidence of melatonin with a light-entrained sensitive period?	1988	Biology of reproduction	39	1		66	75		73	10.1095/biolreprod39.1.66	https://www.scopus.com/inward/record.uri?eid=2-s2.0-0024066488&doi=10.1095%2fbiolreprod39.1.66&partnerID=40&md5=04def35a200bd41646159b46bbd8e77d	Department of Physiology, University of Michigan, Ann Arbor 48109., United States	Wayne, N.L., Department of Physiology, University of Michigan, Ann Arbor 48109., United States; Malpaux, B., Department of Physiology, University of Michigan, Ann Arbor 48109., United States; Karsch, F.J., Department of Physiology, University of Michigan, Ann Arbor 48109., United States	The main objective of the study was to test the hypothesis that the phase of melatonin release with respect to the light-dark cycle mediates the effects of photoperiod on the reproductive response of the ewe. To test the phase hypothesis, we eliminated endogenous melatonin secretion by pinealectomy and then restored physiological levels of serum melatonin with rises of the same duration but at di…		luteinizing hormone; melatonin; animal; article; blood; circadian rhythm; darkness; drug effect; female; light; physiology; reference value; secretion; sheep; Animals; Circadian Rhythm; Darkness; Female; Light; Luteinizing Hormone; Melatonin; Reference Values; Sheep		luteinizing hormone, 39341-83-8, 9002-67-9; melatonin, 73-31-4; Luteinizing Hormone, 9002-67-9; Melatonin, 73-31-4							Wayne, N.L.								63363			3207798	English	Biol. Reprod.	Article	Final	Open Access	Scopus	2-s2.0-0024066488	1988_Wayne_How	1988_Wayne_How.pdf	https://sci-hub.se/10.1095/biolreprod39.1.66	Y
Higuchi S., Motohashi Y., Liu Y., Ahara M., Kaneko Y.	7202930876;7102153452;57192560713;57190426079;35449481100;	Effects of VDT tasks with a bright display at night on melatonin, core temperature, heart rate, and sleepiness	2003	Journal of Applied Physiology	94	5		1773	1776		73	10.1152/japplphysiol.00616.2002	https://www.scopus.com/inward/record.uri?eid=2-s2.0-0037404452&doi=10.1152%2fjapplphysiol.00616.2002&partnerID=40&md5=5406413ae81970a868c1a38cb14cd3a2	Department of Public Health, Akita University School of Medicine, 1-1-1 Hondo, Akita City 010-8543, Japan	Higuchi, S., Department of Public Health, Akita University School of Medicine, 1-1-1 Hondo, Akita City 010-8543, Japan; Motohashi, Y., Department of Public Health, Akita University School of Medicine, 1-1-1 Hondo, Akita City 010-8543, Japan; Liu, Y., Department of Public Health, Akita University School of Medicine, 1-1-1 Hondo, Akita City 010-8543, Japan; Ahara, M., Department of Public Health, A…	The effects of performing video display terminal (VDT) tasks with a bright display (BD) at night on nocturnal salivary melatonin concentration, rectal temperature, heart rate, and sleepiness were examined. Seven healthy male adults performed exciting VDT tasks with a BD and a dark display (DD) and boring VDT tasks with a BD and a DD from 2300 to 0200. The light intensities of the BD and DD were 4…	Biological rhythm; Electroencephalogram; Internet; Light; Video display terminal; Video game	melatonin; adult; article; biological rhythm; body temperature; computer terminal; controlled study; core temperature; electroencephalogram; heart rate; human; human experiment; light intensity; male; normal human; priority journal; rectum temperature; somnolence; task performance; theta rhythm; video display terminal		melatonin, 73-31-4							Higuchi, S.; Department of Public Health, Akita University School of Medicine, 1-1-1 Hondo, Akita City 010-8543, Japan; email: higuchi@med.akita-u.ac.jp			American Physiological Society					87507587		JAPHE	12533495	English	J. Appl. Physiol.	Article	Final		Scopus	2-s2.0-0037404452	2003_Higuchi_Effects	2003_Higuchi_Effects.pdf	https://sci-hub.se/10.1152/japplphysiol.00616.2002	Y
Nelson D.E., Takahashi J.S.	35548221500;7402170545;	Comparison of visual sensitivity for suppression of pineal melatonin and circadian phase-shifting in the golden hamster	1991	Brain Research	554	2019-02-01		272	277		72	10.1016/0006-8993(91)90200-F	https://www.scopus.com/inward/record.uri?eid=2-s2.0-0025863856&doi=10.1016%2f0006-8993%2891%2990200-F&partnerID=40&md5=ae4dd0603aa8376367eefb3acb01651c	Department of Neurobiology, Physiology Northwestern University Evanston, IL 60208, United States; Institute for Neuroscience Northwestern University Evanston, IL 60208, United States	Nelson, D.E., Department of Neurobiology, Physiology Northwestern University Evanston, IL 60208, United States; Takahashi, J.S., Department of Neurobiology, Physiology Northwestern University Evanston, IL 60208, United States, Institute for Neuroscience Northwestern University Evanston, IL 60208, United States	Visual sensitivity for light suppression of pineal melatonin was measured in golden hamsters using 300 s stimuli of monochromatic light (503 nm) in constant darkness. Increasing stimulus irradiance caused a monotonic decrease in pineal-melatonin content. Irradiance greater than 3.5 × 1010 photons cm-2·s-1 caused significant reductions of melatonin in the hamster pineal. Saturation of the response…	Circadian rhythm; Melatonin; Pineal gland; Suprachiasmatic nucleus; Vision; Visual sensitivity	melatonin; animal experiment; animal tissue; article; circadian rhythm; controlled study; hamster; male; nonhuman; pineal body; priority journal; suprachiasmatic nucleus; vision; Animal; Circadian Rhythm; Comparative Study; Darkness; Hamsters; Lighting; Male; Melatonin; Mesocricetus; Photic Stimulation; Pineal Gland; Support, Non-U.S. Gov't; Support, U.S. Gov't, Non-P.H.S.; Support, U.S. Gov't, P…		melatonin, 73-31-4; Melatonin, 73-31-4							Takahashi, J.S.; Department of Neurobiology, Physiology Northwestern University Evanston, IL 60208, United States								68993		BRREA	1933309	English	Brain Res.	Article	Final		Scopus	2-s2.0-0025863856	1991_Nelson_Comparison	1991_Nelson_Comparison.pdf	https://sci-hub.se/10.1016/0006-8993(91)90200-F	Y
Lam R.W., Berkowitz A.L., Berga S.L., Clark C.M., Kripke D.F., Gillin J.C.	21742966400;7005506392;7005442795;35480697600;7006891661;7103387502;	Melatonin suppression in bipolar and unipolar mood disorders	1990	Psychiatry Research	33	2		129	134		72	10.1016/0165-1781(90)90066-E	https://www.scopus.com/inward/record.uri?eid=2-s2.0-0025075623&doi=10.1016%2f0165-1781%2890%2990066-E&partnerID=40&md5=aed2ebfe9acc2c6b571e2229af509ef2	Department of Psychiatry, University of British Columbia, Vancouver, Canada; Raymond W. Lam, M.D., F.R.C.P.(C.), is Assistant Professor and Consultant Psychiatrist, Mood Disorders Service, Department of Psychiatry, University of British Columbia, Vancouver, USA; Alan L. Berkowitz, M.D., was a Fellow in Clinical Psychopharmacology and Psychobiology at the University of California, San Diego, USA; …	Lam, R.W., Department of Psychiatry, University of British Columbia, Vancouver, Canada; Berkowitz, A.L., Department of Psychiatry, University of British Columbia, Vancouver, Canada; Berga, S.L., Department of Psychiatry, University of British Columbia, Vancouver, Canada; Clark, C.M., Department of Psychiatry, University of British Columbia, Vancouver, Canada; Kripke, D.F., Raymond W. Lam, M.D., F…	Nocturnal melatonin suppression to 500 lux light was studied during an acute episode of illness in 8 patients with bipolar disorder, 7 patients with unipolar depression, and 15 age-, sex-, and season-matched normal controls. Unipolar patients did not differ from controls in melatonin suppression. In contrast to previous studies, controls showed greater melatonin suppression than bipolar patients.…	bipolar; depression; Melatonin; unipolar	melatonin; adult; article; clinical article; depression; human; priority journal; psychological aspect; Bipolar Disorder; Circadian Rhythm; Depressive Disorder; Human; Light; Melatonin; Psychiatric Status Rating Scales; Support, Non-U.S. Gov't		melatonin, 73-31-4; Melatonin, 73-31-4			Canadian Psychiatric Research Foundation, CPRF	Acknowledgment. The researchr eported was supported, in part, by the Canadian Psychiatric Research Foundation.			Lam, R.W.; Department of Psychiatry, University of British Columbia, Vancouver, Canada								1651781		PSRSD	2243889	English	Psychiatry Res.	Article	Final		Scopus	2-s2.0-0025075623	1990_Lam_Melatonin	1990_Lam_Melatonin.pdf	https://sci-hub.se/10.1016/0165-1781(90)90066-E	Y
Sauer L.A., Dauchy R.T., Blask D.E.	7004486514;7004364685;7006151595;	Polyunsaturated fatty acids, melatonin, and cancer prevention	2001	Biochemical Pharmacology	61	12		1455	1462		72	10.1016/S0006-2952(01)00634-7	https://www.scopus.com/inward/record.uri?eid=2-s2.0-0035876962&doi=10.1016%2fS0006-2952%2801%2900634-7&partnerID=40&md5=f87e60d0513c64374f9f496a9cea36d1	Bassett Research Institute, The Mary Imogene Bassett Hospital, Cooperstown, NY 13326, United States	Sauer, L.A., Bassett Research Institute, The Mary Imogene Bassett Hospital, Cooperstown, NY 13326, United States; Dauchy, R.T., Bassett Research Institute, The Mary Imogene Bassett Hospital, Cooperstown, NY 13326, United States; Blask, D.E., Bassett Research Institute, The Mary Imogene Bassett Hospital, Cooperstown, NY 13326, United States	Many nutritional, hormonal, and environmental factors affect carcinogenesis and growth of established tumors in rodents. In some cases, these factors may either enhance or attenuate the neoplastic process. Recent experiments performed in our laboratory using tissue-isolated rat hepatoma 7288CTC in vivo or during perfusion in situ have demonstrated new interactions among four of these factors. Two…	Cancer prevention; Linoleic acid; Melatonin; N3 Fatty acids; Signal transduction; Tumor growth	8 bromo cyclic AMP; antineoplastic agent; coriolic acid; hormone receptor blocking agent; icosapentaenoic acid; inhibitory guanine nucleotide binding protein; linoleic acid; melatonin; melatonin receptor; mitogenic agent; n [2 (1 naphthyl)ethyl]cyclobutanecarboxamide; neurohormone; nordihydroguaiaretic acid; polyunsaturated fatty acid; receptor; unclassified drug; cancer prevention; cancer tissue…		8 bromo cyclic AMP, 23583-48-4; coriolic acid, 5204-88-6; icosapentaenoic acid, 10417-94-4, 1553-41-9, 25378-27-2, 32839-30-8; linoleic acid, 1509-85-9, 2197-37-7, 60-33-3, 822-17-3; melatonin, 73-31-4; nordihydroguaiaretic acid, 500-38-9	s 20928						Sauer, L.A.P.O. Box 3, Stevensville, MT 59870, United States; email: lensauer@juno.com			Elsevier Inc.					62952		BCPCA	11377374	English	Biochem. Pharmacol.	Article	Final		Scopus	2-s2.0-0035876962	2001_Sauer_Polyunsaturated	2001_Sauer_Polyunsaturated.pdf	https://sci-hub.se/10.1016/S0006-2952(01)00634-7	Y
Cronin A.J., Keifer J.C., Davies M.F., King T.S., Bixler E.O.	7006575719;35606043900;36443396000;7403270844;7006447944;	Melatonin secretion after surgery	2000	Lancet	356	9237		1244	1245		72	10.1016/S0140-6736(00)02795-1	https://www.scopus.com/inward/record.uri?eid=2-s2.0-0034619069&doi=10.1016%2fS0140-6736%2800%2902795-1&partnerID=40&md5=24f3621f351902ff7b0b191b0858cc67	Department of Anesthesiology, Milton S Hershey Medical Center, Pennsylvannia State University, PO Box 850, Hershey, PA 17033, United States; Department of Obstetrics and Gynecology, Milton S Hershey Medical Center, Pennsylvannia State University, PO Box 850, Hershey, PA 17033, United States; Department of Health Evaluation Sciences, Milton S Hershey Medical Center, Pennsylvannia State University,…	Cronin, A.J., Department of Anesthesiology, Milton S Hershey Medical Center, Pennsylvannia State University, PO Box 850, Hershey, PA 17033, United States; Keifer, J.C., Department of Anesthesiology, Duke University Medical Center, Durham, NC 27710, United States; Davies, M.F., Department of Obstetrics and Gynecology, Milton S Hershey Medical Center, Pennsylvannia State University, PO Box 850, Her…	Sleep disturbance is common postoperatively. We examined whether melatonin concentrations were related to this disturbance in seven postoperative patients. Nocturnal concentrations of melatonin were significantly (p=0.005) lower on the first than on the second or third nights after surgery. This finding raises the possibility that melatonin suppression and associated sleep disturbance might be pr…		melatonin; adult; article; circadian rhythm; clinical article; clinical trial; female; hormone blood level; hormone release; human; light exposure; postoperative complication; postoperative period; priority journal; sleep disorder		melatonin, 73-31-4							Cronin, A.J.; Departments of Anesthesiology, Milton S Hershey Medical Center, Pennsylvannia State University, PO Box 850, Hershey, PA 17033, United States; email: acronin@psghs.edu			Elsevier Limited					1406736		LANCA	11072950	English	Lancet	Article	Final		Scopus	2-s2.0-0034619069	2000_Cronin_Melatonin	2000_Cronin_Melatonin.pdf	https://sci-hub.se/10.1016/S0140-6736(00)02795-1	Y
Jung C.M., Khalsa S.B.S., Scheer F.A.J.L., Cajochen C., Lockley S.W., Czeisler C.A., Wright Jr. K.P.	36448337800;7004760420;6603581864;7003530216;56751118900;7006224092;7403324944;	Acute effects of bright light exposure on cortisol levels	2010	Journal of Biological Rhythms	25	3		208	216		72	10.1177/0748730410368413	https://www.scopus.com/inward/record.uri?eid=2-s2.0-77952656954&doi=10.1177%2f0748730410368413&partnerID=40&md5=7bce6ad34e914849029fb1c347ca108a	Department of Integrative Physiology, Center for Neuroscience, University of Colorado, Boulder, CO, United States; Department of Medicine, Brigham and Womens Hospital, Harvard Medical School, Boston, MA, United States; Centre for Chronobiology, Psychiatric University Clinic, Basel, Switzerland	Jung, C.M., Department of Integrative Physiology, Center for Neuroscience, University of Colorado, Boulder, CO, United States; Khalsa, S.B.S., Department of Medicine, Brigham and Womens Hospital, Harvard Medical School, Boston, MA, United States; Scheer, F.A.J.L., Department of Medicine, Brigham and Womens Hospital, Harvard Medical School, Boston, MA, United States; Cajochen, C., Centre for Chron…	Multisynaptic neural and endocrine pathways from the suprachiasmatic nucleus of the hypothalamus have been hypothesized to communicate circadian and photic information to the adrenal glands. In humans, light exposure has been reported to have no effect, increase, or decrease cortisol levels. These inconsistent findings in humans may be related to differences among studies including the intensity …	Adrenal gland; Biological clock; Circadian phase; Circadian rhythm; Diurnal	hydrocortisone; melatonin; adrenal gland; adult; article; biological rhythm; blood; circadian rhythm; female; human; light; male; photoperiodicity; photostimulation; radiation exposure; radiation response; Adrenal Glands; Adult; Biological Clocks; Circadian Rhythm; Dose-Response Relationship, Radiation; Female; Humans; Hydrocortisone; Light; Male; Melatonin; Photic Stimulation; Photoperiod		hydrocortisone, 50-23-7; melatonin, 73-31-4; Hydrocortisone, 50-23-7; Melatonin, 73-31-4							Wright Jr., K. P.; Sleep and Chronobiology Laboratory, Department of Integrative Physiology, University of Colorado, Boulder, CO 80309-0354, United States; email: Kenneth.wright@colorado.edu								7487304		JBRHE	20484692	English	J. Biol. Rhythms	Article	Final		Scopus	2-s2.0-77952656954	2010_Jung_Acute	2010_Jung_Acute.pdf	https://sci-hub.se/10.1177/0748730410368413	Y
Wurtman R.J.	7203087223;	The effects of light on the human body.	1975	Scientific American	233	1		69	77		72	10.1038/scientificamerican0775-68	https://www.scopus.com/inward/record.uri?eid=2-s2.0-0016524615&partnerID=40&md5=19e16f183107b2325218b0bd4a02f774		Wurtman, R.J.	This article explores the influences of light on human health and suggests that exposure to artificial light may have harmful effects. The effects of ligght on mammalian tissue are either direct or indirect, depending on whether the immediate cause is a photochemical reaction within the tissue or a neural or neuroendocrine signal generated by a photoreceptor cell. Light exerts an indirect effect …		calcium; melatonin; vitamin D; article; biology; biosynthesis; body temperature; circadian rhythm; ecology; environment; human; light; metabolism; phototherapy; physiology; pineal body; radiation exposure; radiation response; skin; spectroscopy; sunburn; Biology; Ecology; Environment; Body Temperature; Calcium; Circadian Rhythm; Dose-Response Relationship, Radiation; Human; Light; Melatonin; Phot…		calcium, 7440-70-2; melatonin, 73-31-4; Calcium, 7440-70-2; Melatonin, 73-31-4; Vitamin D, 1406-16-2							Wurtman, R.J.								368733			1145170	English	Sci Am	Article	Final		Scopus	2-s2.0-0016524615	1975_Wurtman_The	1975_Wurtman_The.pdf	https://sci-hub.se/10.1038/scientificamerican0775-68	Y
McIntyre I.M., Norman T.R., Burrows G.D., Armstrong S.M.	24379769800;7101661686;7202553584;55459530500;	Quantal melatonin suppression by exposure to low intensity light in man	1989	Life Sciences	45	4		327	332		71	10.1016/0024-3205(89)90142-2	https://www.scopus.com/inward/record.uri?eid=2-s2.0-0024344510&doi=10.1016%2f0024-3205%2889%2990142-2&partnerID=40&md5=f59acae5263c913a6c8f539ffd1fdaba	Psychoendocrine Research Unit, Department of Psychiatry, University of Melbourne, Heidelberg, Vic. 3084, Australia; Department of Psychology, Brain Behaviour Research Institute, Latrobe University, Bundoora, Vic. 3083, Australia	McIntyre, I.M., Psychoendocrine Research Unit, Department of Psychiatry, University of Melbourne, Heidelberg, Vic. 3084, Australia; Norman, T.R., Psychoendocrine Research Unit, Department of Psychiatry, University of Melbourne, Heidelberg, Vic. 3084, Australia; Burrows, G.D., Psychoendocrine Research Unit, Department of Psychiatry, University of Melbourne, Heidelberg, Vic. 3084, Australia; Armstr…	Plasma melatonin concentrations were examined following three relatively low intensities of artificial light. Six normal, healthy control subjects were all exposed to (a) 200 lux, (b) 400 lux and (c) 600 lux for a three hour duration from midnight to 0300 h. Blood was also collected on a control night where light intensity was less than 10 lux throughout. Significant suppression of melatonin was …		melatonin; adult; blood level; controlled study; dose response; female; human; human experiment; light exposure; male; normal human; priority journal; Adult; Circadian Rhythm; Human; Light; Melatonin; Radioimmunoassay; Reference Values; Support, Non-U.S. Gov't		melatonin, 73-31-4; Melatonin, 73-31-4			National Health and Medical Research Council University of Melbourne Melbourne Research, University of Melbourne	This project was approved by the University of Melbourne and Austin Hospital Ethics Committee and was performed in accordance with guidelines set out by the National Health and Medical Research Council of Australia	The authors wish to thank Ms. Michelle Featherstone for typing the manuscript. work was supported in part through a University of Melbourne Research Grant.		McIntyre, I.M.; Psychoendocrine Research Unit, Department of Psychiatry, University of Melbourne, Heidelberg, Vic. 3084, Australia								243205		LIFSA	2761346	English	Life Sci.	Article	Final		Scopus	2-s2.0-0024344510	1989_McIntyre_Quantal	1989_McIntyre_Quantal.pdf	https://sci-hub.se/10.1016/0024-3205(89)90142-2	Y
Kalsbeek A., Cutrera R.A., Van Heerikhuize J.J., Van Der Vliet J., Buijs R.M.	7003582969;55166543900;6603825982;7006830316;7005135406;	GABA release from suprachiasmatic nucleus terminals is necessary for the light-induced inhibition of nocturnal melatonin release in the rat	1999	Neuroscience	91	2		453	461		71	10.1016/S0306-4522(98)00635-6	https://www.scopus.com/inward/record.uri?eid=2-s2.0-0032907254&doi=10.1016%2fS0306-4522%2898%2900635-6&partnerID=40&md5=fe569065e01f9f9374a7438c6276cbbd	Netherlands Inst. for Brain Research, Meibergdreef 33, 1105 AZ, Amsterdam, Netherlands; Depto. de Fisiologia, Lab. Neurociencia, P., Piso, Argentina	Kalsbeek, A., Netherlands Inst. for Brain Research, Meibergdreef 33, 1105 AZ, Amsterdam, Netherlands; Cutrera, R.A., Depto. de Fisiologia, Lab. Neurociencia, P., Piso, Argentina; Van Heerikhuize, J.J., Netherlands Inst. for Brain Research, Meibergdreef 33, 1105 AZ, Amsterdam, Netherlands; Van Der Vliet, J., Netherlands Inst. for Brain Research, Meibergdreef 33, 1105 AZ, Amsterdam, Netherlands; Bu…	The daily rhythm of melatonin production in the mammalian pineal is driven by the endogenous circadian pacemaker in the suprachiasmatic nuclei. The major release period of melatonin is closely linked to the dark phase of the 24-h day/night cycle. Environmental light will affect melatonin release in two ways: (i) it entrains the rhythm of the circadian oscillator; and (ii) it causes an acute suppr…	Circadian; Hypothalamus; Microdialysis; Pineal; Suprachiasmatic	4 aminobutyric acid; glutamic acid; melatonin; animal cell; animal tissue; article; circadian rhythm; efferent nerve; hormone release; male; microdialysis; nonhuman; pineal body; priority journal; rat; suprachiasmatic nucleus; synaptic transmission; Animals; Bicuculline; Circadian Rhythm; Darkness; Functional Laterality; gamma-Aminobutyric Acid; Light; Male; Melatonin; Neurons; Presynaptic Termin…		Bicuculline, 485-49-4; gamma-Aminobutyric Acid, 56-12-2; Melatonin, 73-31-4			National Institute of Biological Resources	This work was supported by grants from the Van den Houten Fund of the NIBR and Institut de Recherches Internationales Servier (grant No. PHA-614-NLD). The authors thank Wilma Verweij for correcting the English, and Henk Stoffels for preparing the illustrations.			Kalsbeek, A.; Netherlands Inst. for Brain Research, Meibergdreef 33, 1105 AZ Amsterdam, Netherlands								3064522		NRSCD	10366002	English	Neuroscience	Article	Final		Scopus	2-s2.0-0032907254	1999_Kalsbeek_GABA	1999_Kalsbeek_GABA.pdf	https://sci-hub.se/10.1016/S0306-4522(98)00635-6	Y
Figueiro M.G., Bullough J.D., Parsons R.H., Rea M.S.	6603467729;7004105788;7202030794;57203044495;	Preliminary evidence for spectral opponency in the suppression of melatonin by light in humans	2004	NeuroReport	15	2		313	316		71	10.1097/00001756-200402090-00020	https://www.scopus.com/inward/record.uri?eid=2-s2.0-1542350308&doi=10.1097%2f00001756-200402090-00020&partnerID=40&md5=27b50bb7e9df06d8249d922b64ca380e	Lighting Research Center, Rensselaer Polytechnic Institute, 21 Union Street, Troy, NY 12180, United States; Department of Biology, Rensselaer Polytechnic Institute, 110 8th Street, Troy, NY 12180, United States	Figueiro, M.G., Lighting Research Center, Rensselaer Polytechnic Institute, 21 Union Street, Troy, NY 12180, United States; Bullough, J.D., Lighting Research Center, Rensselaer Polytechnic Institute, 21 Union Street, Troy, NY 12180, United States; Parsons, R.H., Department of Biology, Rensselaer Polytechnic Institute, 110 8th Street, Troy, NY 12180, United States; Rea, M.S., Lighting Research Cen…	Human adult males were exposed to light from blue light emitting diodes (18 lux; 29 μW/cm2) and from clear mercury vapor lamps (450 lux; 170 μW/cm2) during night-time experimental sessions. Both conditions suppressed nocturnal melatonin concentrations in blood plasma with the blue light more effective than mercury at melatonin suppression. No additive model incorporating opsin photopigments eithe…	Circadian rhythms; Melanopsin; Melatonin; Opponency; Photoreceptors	melatonin; mercury; opsin; adult; article; blue light; circadian rhythm; controlled study; female; hormone blood level; human; human experiment; light emitting diode; light exposure; male; night; photoreceptor; priority journal; spectral sensitivity; Adult; Bodily Secretions; Circadian Rhythm; Humans; Light; Lighting; Male; Melatonin; Models, Neurological; Opsin; Photoreceptors; Pineal Gland; Ret…		melatonin, 73-31-4; mercury, 14302-87-5, 7439-97-6; melanopsin; Melatonin, 73-31-4; Opsin							Rea, M.S.; Lighting Research Center, Rensselaer Polytechnic Institute, 21 Union Street, Troy, NY 12180, United States; email: ream@rpi.edu								9594965		NERPE	15076759	English	NeuroReport	Article	Final		Scopus	2-s2.0-1542350308	2004_Figueiro_Preliminary	2004_Figueiro_Preliminary.pdf	https://sci-hub.se/10.1097/00001756-200402090-00020	Y
Kumar V., Follett B.K.	57202531757;7006798560;	The circadian nature of melatonin secretion in Japanese quail (Coturnix coturnix japonica)	1993	Journal of Pineal Research	14	4		192	200		71	10.1111/j.1600-079X.1993.tb00502.x	https://www.scopus.com/inward/record.uri?eid=2-s2.0-0027186036&doi=10.1111%2fj.1600-079X.1993.tb00502.x&partnerID=40&md5=2029b1ee26973d0f664984bcd41ade29	Afrc Research Group on Photoperiodism & Reproduction, Department of Zoology, School of Biological Sciences, University of Bristol, Bristol, United Kingdom	Kumar, V., Afrc Research Group on Photoperiodism & Reproduction, Department of Zoology, School of Biological Sciences, University of Bristol, Bristol, United Kingdom; Follett, B.K., Afrc Research Group on Photoperiodism & Reproduction, Department of Zoology, School of Biological Sciences, University of Bristol, Bristol, United Kingdom	Abstract: Plasma melatonin concentrations were measured in Japanese quail held under different photoperiods and constant darkness (<1 lux). When subjected to LD6:18 (6 hr light: 18 hr darkness), levels rose ∼2 hr after lights‐off, attained a peak level 8 hr after lights off, and subsequently declined to low daytime levels before the next lights‐on signal. This generated a distinct daily rhythm in…	circadian rhythm; melatonin; photoperiod; quail	melatonin; animal experiment; article; circadian rhythm; controlled study; nonhuman; photoperiodicity; pineal body; quail; Animal; Circadian Rhythm; Coturnix; Dark Adaptation; Light; Melatonin; Photoperiod; Pineal Gland; Radioimmunoassay; Support, Non-U.S. Gov't		melatonin, 73-31-4; Melatonin, 73-31-4							Follett, B.K.; University of Warwick, Coventry, CV47AJ, United Kingdom								7423098			8345447	English	J. Pineal Res.	Article	Final		Scopus	2-s2.0-0027186036	1993_Kumar_The	1993_Kumar_The.pdf	https://sci-hub.se/10.1111/j.1600-079X.1993.tb00502.x	Y
Fischer T.W., Zbytek B., Sayre R.M., Apostolov E.O., Basnakian A.G., Sweatman T.W., Wortsman J., Elsner P., Slominski A.	7402050965;7801355626;7006406303;8321646900;6602098807;7003738387;7004946882;7103015219;7005051680;	Melatonin increases survival of HaCaT keratinocytes by suppressing UV-induced apoptosis	2006	Journal of Pineal Research	40	1		18	26		70	10.1111/j.1600-079X.2005.00273.x	https://www.scopus.com/inward/record.uri?eid=2-s2.0-33644929274&doi=10.1111%2fj.1600-079X.2005.00273.x&partnerID=40&md5=7272a3b90ba81d3b8053d72b9dfa7ea2	Department of Pathology and Laboratory Medicine, University of Tennessee Health Science Center, Memphis, TN, United States; Department of Dermatology and Allergology, Friedrich-Schiller-University, Jena, Germany; Division of Dermatology, Department of Medicine, University of Tennessee Health Science Center, Memphis, TN, United States; Division of Nephrology, Department of Internal Medicine, Unive…	Fischer, T.W., Department of Pathology and Laboratory Medicine, University of Tennessee Health Science Center, Memphis, TN, United States, Department of Dermatology and Allergology, Friedrich-Schiller-University, Jena, Germany; Zbytek, B., Department of Pathology and Laboratory Medicine, University of Tennessee Health Science Center, Memphis, TN, United States; Sayre, R.M., Division of Dermatolog…	Melatonin is a potent antioxidant and direct radical scavenger. As keratinocytes represent the major population in the skin and UV light causes damage to these cells, the possible protective effects of melatonin against UV-induced cell damage in HaCaT keratinocytes were investigated in vitro. Cells were preincubated with melatonin at graded concentrations from 10-9 to 10-3 m for 30 min prior to U…	Apoptosis; Cell viability; Clonogenicity; Keratinocytes; Melatonin; UV light	antioxidant; DNA; melatonin; scavenger; melatonin; thymidine; apoptosis; article; cell culture; cell damage; cell protection; cell survival; clonogenesis; colony formation; DNA synthesis; human; human cell; keratinocyte; nick end labeling; plating medium; radiation dose; ultraviolet radiation; apoptosis; drug effect; keratinocyte; metabolism; radiation exposure; radiation response; ultraviolet ra…		DNA, 9007-49-2; melatonin, 73-31-4; thymidine, 50-89-5; Melatonin, 73-31-4; Thymidine, 50-89-5							Slominski, A.; Department of Pathology and Laboratory Medicine, University of Tennessee Health Science Center, 930 Madison Avenue, Memphis, TN 38163, United States; email: aslominski@utmem.edu								7423098		JPRSE	16313494	English	J. Pineal Res.	Article	Final		Scopus	2-s2.0-33644929274	2006_Fischer_Melatonin	2006_Fischer_Melatonin.pdf	https://sci-hub.se/10.1111/j.1600-079X.2005.00273.x	Y
Johnston J.D., Tournier B.B., Andersson H., Masson-Pévet M., Lincoln G.A., Hazlerigg D.G.	7403398000;6602550642;7201455442;7005265863;7006590910;6701834786;	Multiple effects of melatonin on rhythmic clock gene expression in the mammalian pars tuberalis	2006	Endocrinology	147	2		959	965		70	10.1210/en.2005-1100	https://www.scopus.com/inward/record.uri?eid=2-s2.0-30944450220&doi=10.1210%2fen.2005-1100&partnerID=40&md5=87a2ac61cadb9d43f41d1635446d5857	School of Biological Sciences, University of Aberdeen, Zoology Building, Aberdeen AB24 2TZ, United Kingdom; Neurobiologie des Rhythmes Laboratory, Unité Mixte de Recherche 7518 Centre National de la Recherche Scientifique, Université Louis Pasteur, 67084 Strasbourg, France; Medical Research Council Human Reproductive Sciences Unit, Centre for Reproductive Biology, Queen's Medical Research Institu…	Johnston, J.D., School of Biological Sciences, University of Aberdeen, Zoology Building, Aberdeen AB24 2TZ, United Kingdom, School of Biomedical and Molecular Sciences, University of Surrey, Guildford GU2 7XH, United Kingdom; Tournier, B.B., Neurobiologie des Rhythmes Laboratory, Unité Mixte de Recherche 7518 Centre National de la Recherche Scientifique, Université Louis Pasteur, 67084 Strasbourg…	In mammals, changing day length modulates endocrine rhythms via nocturnal melatonin secretion. Studies of the pituitary pars tuberalis (PT) suggest that melatonin-regulated clock gene expression is critical to this process. Here, we considered whether clock gene rhythms continue in the PT in the absence of melatonin and whether the effects of melatonin on the expression of these genes are tempora…		gene product; melatonin; transcription factor CLOCK; animal cell; animal experiment; animal tissue; article; clock gene; controlled study; female; gene; gene expression; hormone action; hormone release; hypophysis pars tuberalis; in situ hybridization; infusion; nonhuman; photoperiodicity; priority journal; sheep; Analysis of Variance; Animals; Biological Clocks; Circadian Rhythm; Female; Gene Ex…		melatonin, 73-31-4; Melatonin, 73-31-4; Nuclear Proteins; RNA, Messenger							Hazlerigg, D.G.; School of Biological Sciences, University of Aberdeen, Zoology Building, Tillydrone Avenue, Aberdeen AB24 2TZ, United Kingdom; email: d.hazlerigg@abdn.ac.uk								137227		ENDOA	16269454	English	Endocrinology	Article	Final	Open Access	Scopus	2-s2.0-30944450220	2006_Johnston_Multiple	2006_Johnston_Multiple.pdf	https://sci-hub.se/10.1210/en.2005-1100	Y
Michael Iuvone P., Boatright J.H., Bloom M.M.	56002452900;7004754996;7202362970;	Dopamine mediates the light-evoked suppression of serotonin N-acetyltransferase activity in retina	1987	Brain Research	418	2		314	324		69	10.1016/0006-8993(87)90098-9	https://www.scopus.com/inward/record.uri?eid=2-s2.0-0023232109&doi=10.1016%2f0006-8993%2887%2990098-9&partnerID=40&md5=de373f71b0c4deb599d0159ead279f3a	Department of Pharmacology, Emory University School of Medicine, Atlanta, GA 30322, United States	Michael Iuvone, P., Department of Pharmacology, Emory University School of Medicine, Atlanta, GA 30322, United States; Boatright, J.H., Department of Pharmacology, Emory University School of Medicine, Atlanta, GA 30322, United States; Bloom, M.M., Department of Pharmacology, Emory University School of Medicine, Atlanta, GA 30322, United States	The possible role of dopamine in the light-induced suppression of serotonin N-acetyltransferase (NAT) activity in retinas of the African clawed frog (Xenopus laevis) was investigated using an in vitro eye cup preparation. The nocturnal increase of retinal NAT activity was significantly inhibited by either light exposure or exogenous dopamine. Spiperone, a dopamine receptor blocker, antagonized th…	Cyclic nucleotide phosphodiesterase; Dopamine; Melatonin; Retina; Serotonin N-acetyltransferase	4 (3 butoxy 4 methoxybenzyl) 2 imidazolidinone; clozapine; dopamine; flupentixol; haloperidol; isobutylmethylxanthine; melatonin; metoclopramide; papaverine; radioisotope; serotonin n acetyltransferase; spiperone; animal experiment; frog; nonhuman; retina; topical drug administration; visual system; 1-Methyl-3-isobutylxanthine; 3,4-Dihydroxyphenylacetic Acid; Acetyltransferases; Adrenergic alpha-…		4 (3 butoxy 4 methoxybenzyl) 2 imidazolidinone, 29925-17-5; clozapine, 5786-21-0; dopamine, 51-61-6, 62-31-7; flupentixol, 2413-38-9, 2709-56-0; haloperidol, 52-86-8; isobutylmethylxanthine, 28822-58-4; melatonin, 73-31-4; metoclopramide, 12707-59-4, 2576-84-3, 364-62-5, 7232-21-5; papaverine, 58-74-2, 61-25-6; spiperone, 749-02-0; 1-Methyl-3-isobutylxanthine, 28822-58-4; 3,4-Dihydroxyphenylaceti…							Michael Iuvone, P.; Department of Pharmacology, Emory University School of Medicine, Atlanta, GA 30322, United States								68993		BRREA	2445415	English	Brain Res.	Article	Final		Scopus	2-s2.0-0023232109	1987_Michael_Dopamine	1987_Michael_Dopamine.pdf	https://sci-hub.se/10.1016/0006-8993(87)90098-9	Y
Leproult R., Van Reeth O., Byrne M.M., Sturis J., Van Cauter E.	6701318493;55645430500;36460662500;7006535244;7004866563;	Sleepiness, Performance, and Neuroendocrine Function during Sleep Deprivation: Effects of Exposure to Bright Light or Exercise	1997	Journal of Biological Rhythms	12	3		245	258		69	10.1177/074873049701200306	https://www.scopus.com/inward/record.uri?eid=2-s2.0-0031154334&doi=10.1177%2f074873049701200306&partnerID=40&md5=6dba1aafd15af731f8ab855da85dfa15	Department of Medicine, University of Chicago, Chicago, IL 60637, United States; Ctr. for the Stud. of Biol. Rhythms, Université Libre de Bruxelles, B-1070 Brussels, Belgium; Department of Medicine, MC 1027, University of Chicago, 5841 South Maryland Avenue, Chicago, IL 60637, United States	Leproult, R., Department of Medicine, University of Chicago, Chicago, IL 60637, United States, Ctr. for the Stud. of Biol. Rhythms, Université Libre de Bruxelles, B-1070 Brussels, Belgium; Van Reeth, O., Ctr. for the Stud. of Biol. Rhythms, Université Libre de Bruxelles, B-1070 Brussels, Belgium; Byrne, M.M., Department of Medicine, University of Chicago, Chicago, IL 60637, United States; Sturis,…	The temporal profiles of subjective fatigue (as assessed by the Stanford Sleepiness Scale), of cognitive performance (on a digit symbol substitution test and a symbol copying task), of body temperature, and of the peripheral concentrations of melatonin, thyroid-stimulating hormone (TSH), and cortisol were obtained simultaneously at frequent intervals in 17 normal young subjects submitted to a 43-…	Circadian rhythm; Cortisol; Fatigue; Glucose use; Melatonin; Performance; Sleep deprivation; Thyroid-stimulating-hormone	glucose; adult; article; circadian rhythm; exercise; human; male; neurosecretion; photostimulation; physiology; sleep deprivation; Adult; Circadian Rhythm; Exercise; Glucose; Humans; Male; Neurosecretory Systems; Photic Stimulation; Sleep Deprivation		Glucose, 50-99-7							Van Cauter, E.; Department of Medicine, MC 1027, University of Chicago, 5841 South Maryland Avenue, Chicago, IL 60637, United States			SAGE Publications Inc.					7487304		JBRHE	9181436	English	J. Biol. Rhythms	Article	Final		Scopus	2-s2.0-0031154334	1997_Leproult_Sleepiness,	1997_Leproult_Sleepiness,.pdf	https://sci-hub.se/10.1177/074873049701200306	Y
Lockley S.W., Skene D.J., Thapan K., English J., Ribeiro D., Haimov I., Hampton S., Middleton B., Von Schantz M., Arendt J.	56751118900;21035951300;8267252200;7202807110;16939925300;6603157654;7005791881;7102750967;7003752814;7101704924;	Extraocular light exposure does not suppress plasma melatonin in humans	1998	Journal of Clinical Endocrinology and Metabolism	83	9		3369	3372		69	10.1210/jcem.83.9.5244	https://www.scopus.com/inward/record.uri?eid=2-s2.0-7844246155&doi=10.1210%2fjcem.83.9.5244&partnerID=40&md5=891b8776f1a30ed40775ff8c91fa1801	School of Biological Sciences, University of Surrey, Guildford, Surrey GU2 5XH, United Kingdom	Lockley, S.W., School of Biological Sciences, University of Surrey, Guildford, Surrey GU2 5XH, United Kingdom; Skene, D.J., School of Biological Sciences, University of Surrey, Guildford, Surrey GU2 5XH, United Kingdom; Thapan, K., School of Biological Sciences, University of Surrey, Guildford, Surrey GU2 5XH, United Kingdom; English, J., School of Biological Sciences, University of Surrey, Guild…	Light affects the circadian axis in at least two ways. It can cause the acute suppression of pineal melatonin synthesis, and/or a phase-shift of the circadian oscillator. As recent evidence has suggested that extraocular light exposure may cause phase-shifts of the circadian clock, we have investigated whether suppression of melatonin can be induced by the same type of light exposure. In the firs…		melatonin; adult; article; hormone blood level; hormone synthesis; human; human experiment; light exposure; male; neuroendocrine system; pineal body; priority journal; radioimmunoassay; supraoptic nucleus		melatonin, 73-31-4							Skene, D.J.; School of Biological Sciences, University of Surrey Guilford, Surrey GU2 5XH, United Kingdom			Endocrine Society					0021972X		JCEMA	9745457	English	J. Clin. Endocrinol. Metab.	Article	Final	Open Access	Scopus	2-s2.0-7844246155	1998_Lockley_Extraocular	1998_Lockley_Extraocular.pdf	https://sci-hub.se/10.1210/jcem.83.9.5244	Y
Myers B.L., Badia P.	14322286400;7004994249;	Immediate effects of different light intensities on body temperature and alertness	1993	Physiology and Behavior	54	1		199	202		68	10.1016/0031-9384(93)90067-P	https://www.scopus.com/inward/record.uri?eid=2-s2.0-0027300931&doi=10.1016%2f0031-9384%2893%2990067-P&partnerID=40&md5=242a78039f606313296d37080c8d25f6	Bowling Green State University, Department of Psychology, Bowling Green, OH 43403, United States	Myers, B.L., Bowling Green State University, Department of Psychology, Bowling Green, OH 43403, United States; Badia, P., Bowling Green State University, Department of Psychology, Bowling Green, OH 43403, United States	The effects of different light intensities on temperature and alertness were investigated. It was hypothesized that temperature and alertness would be affected by certain light intensities but only during the melatonin release period (after 2100 h). Fifteen subjects were tested under three levels of light known to suppress melatonin (500, 1000, and 5000 lx) and a level known not to affect melaton…	Alertness; Bright light; Chronobiology; Circadian; EEG; Melatonin; Noncircadian; Photic stimulation; Pineal; Seasonal affective disorder; Sleep; Temperature; Thermoregulation	adult; alertness; article; clinical article; controlled study; human; human experiment; light exposure; male; normal human; priority journal; thermoregulation; Adult; Arousal; Body Temperature Regulation; Circadian Rhythm; Dose-Response Relationship, Radiation; Human; Light; Male; Melatonin		Melatonin, 73-31-4							Myers, B.L.; Bowling Green State University, Department of Psychology, Bowling Green, OH 43403, United States								319384		PHBHA	8327605	English	Physiol. Behav.	Article	Final		Scopus	2-s2.0-0027300931	1993_Myers_Immediate	1993_Myers_Immediate.pdf	https://sci-hub.se/10.1016/0031-9384(93)90067-P	Y
Bonde J.P., Hansen J., Kolstad H.A., Mikkelsen S., Olsen J.H., Blask D.E., Härmä M., Kjuus H., de Koning H.J., Olsen J., Møller M., Schernhammer E.S., Stevens R.G., Åkerstedt T.	7005973020;35390834800;7003342241;7006119942;57205868284;7006151595;7005318528;56488492200;7005786691;53865355300;15765843300;7004207502;56788478400;35500389600;	Work at night and breast cancer - report on evidence-based options for preventive actions	2012	Scandinavian Journal of Work, Environment and Health	38	4		380	390		67	10.5271/sjweh.3282	https://www.scopus.com/inward/record.uri?eid=2-s2.0-84863682645&doi=10.5271%2fsjweh.3282&partnerID=40&md5=e41a24c19b2f37283e005534204ff75d	Department of Occupational and Environmental Medicine, Bispebjerg Hospital, University of Copenhagen, Bispebjerg Bakke 23, DK-2400 Copenhagen NV, Denmark; Institute of Cancer Epidemiology, Danish Cancer Society, Copenhagen, Denmark; Danish Ramazzini Centre, Department of Occupational Medicine, Aarhus University Hospital, Aarhus, Denmark; Department of Structural and Cellular Biology, School of Me…	Bonde, J.P., Department of Occupational and Environmental Medicine, Bispebjerg Hospital, University of Copenhagen, Bispebjerg Bakke 23, DK-2400 Copenhagen NV, Denmark; Hansen, J., Institute of Cancer Epidemiology, Danish Cancer Society, Copenhagen, Denmark; Kolstad, H.A., Danish Ramazzini Centre, Department of Occupational Medicine, Aarhus University Hospital, Aarhus, Denmark; Mikkelsen, S., Depa…	In 2007, the International Agency for Research on Cancer classified shift work involving circadian disruption as probably carcinogenic to humans (group 2A), primarily based on experimental and epidemiologic evidence for breast cancer. In order to examine options for evidence-based preventive actions, 16 researchers in basic, epidemiological and applied sciences convened at a workshop in Copenhage…	Circadian rhythm; Melatonin; Night work; Occupational disease; Prevention; Shift work	melatonin; biochemistry; biomarker; cancer; carcinogen; circadian rhythm; conference proceeding; disease control; epidemiology; experimental study; health impact; hormone; secretion; tumor; womens employment; womens health; working conditions; article; breast cancer; cancer prevention; cancer risk; circadian rhythm; clinical examination; evidence based medicine; human; light intensity; mammograph…		melatonin, 73-31-4							Bonde, J. P.; Department of Occupational and Environmental Medicine, Bispebjerg Hospital, University of Copenhagen, Bispebjerg Bakke 23, DK-2400 Copenhagen NV, Denmark; email: jpb@bbh.regionh.dk								3553140		SWEHD	22349009	English	Scand. J. Work Environ. Health	Article	Final	Open Access	Scopus	2-s2.0-84863682645	2012_Bonde_Work	2012_Bonde_Work.pdf	https://sci-hub.se/10.5271/sjweh.3282	?
Sletten T.L., Revell V.L., Middleton B., Lederle K.A., Skene D.J.	17339795800;8613504500;7102750967;25960829500;21035951300;	Age-related changes in acute and phase-advancing responses to monochromatic light	2009	Journal of Biological Rhythms	24	1		73	84		67	10.1177/0748730408328973	https://www.scopus.com/inward/record.uri?eid=2-s2.0-58449121954&doi=10.1177%2f0748730408328973&partnerID=40&md5=ea878cf8a3c5e532bfb293bed18776da	Centre for Chronobiology, Faculty of Health and Medical Sciences, University of Surrey, Surrey, United Kingdom; Sleep and Chronobiology Research Group, School of Psychology, Psychiatry and Psychological Medicine, Monash University, VIC 3800, Australia; Centre for Chronobiology, Faculty of Health and Medical Sciences, University of Surrey, Guildford, Surrey, GU2 7XH, United Kingdom	Sletten, T.L., Centre for Chronobiology, Faculty of Health and Medical Sciences, University of Surrey, Surrey, United Kingdom, Sleep and Chronobiology Research Group, School of Psychology, Psychiatry and Psychological Medicine, Monash University, VIC 3800, Australia; Revell, V.L., Centre for Chronobiology, Faculty of Health and Medical Sciences, University of Surrey, Surrey, United Kingdom; Middl…	Reduced sensitivity to short-wavelength (blue) light with age has been shown for light-induced melatonin suppression. The current research aimed to determine if a similar age-related reduction occurs in subjective alertness, mood, and circadian phase-advancing responses. Young (n = 11, 23.0 ± 2.9 years) and older (n = 15, 65.8 ± 5.0 years) healthy males participated in laboratory sessions that in…	Age; Alertness; Monochromatic light; Mood; Phase shifting; Short-wavelength light; Spectral sensitivity	melatonin; adult; age determination; aged; alertness; article; blue light; circadian rhythm; controlled study; human; human experiment; light exposure; light intensity; male; monochromatic light; mood change; normal human; priority journal; pupil reflex; sleep pattern; sleep waking cycle; Adult; Affect; Age Factors; Aged; Aging; Biological Clocks; Circadian Rhythm; Humans; Light; Male; Melatonin;…		melatonin, 73-31-4; Melatonin, 73-31-4							Skene, D. J.; Centre for Chronobiology, Faculty of Health and Medical Sciences, University of Surrey, Guildford, Surrey, GU2 7XH, United Kingdom; email: d.skene@surrey.ac.uk								7487304		JBRHE	19227580	English	J. Biol. Rhythms	Article	Final		Scopus	2-s2.0-58449121954	2009_Sletten_Age-related	2009_Sletten_Age-related.pdf	https://sci-hub.se/10.1177/0748730408328973	Y
Yamazaki S., Goto M., Menaker M.	7402012420;35497345100;7005336144;	No evidence for extraocular photoreceptors in the circadian system of the Syrian hamster	1999	Journal of Biological Rhythms	14	3		197	201		67	10.1177/074873099129000605	https://www.scopus.com/inward/record.uri?eid=2-s2.0-0033153702&doi=10.1177%2f074873099129000605&partnerID=40&md5=27c7dd2583f0585ba10436986b89c51a	Department of Biology, NSF Center for Biological Timing, University of Virginia, Charlottesville, VA 22903-2477, United States	Yamazaki, S., Department of Biology, NSF Center for Biological Timing, University of Virginia, Charlottesville, VA 22903-2477, United States; Goto, M., Department of Biology, NSF Center for Biological Timing, University of Virginia, Charlottesville, VA 22903-2477, United States; Menaker, M., Department of Biology, NSF Center for Biological Timing, University of Virginia, Charlottesville, VA 22903…	Campbell and Murphy reported recently that 3 h of bright light (13,000 lux) exposure to the area behind the knee caused phase shifts of the circadian rhythms of both body temperature and saliva melatonin in humans. The authors tested the hypothesis that extraocular photoreception is also involved in the circadian system of the Syrian hamster. Hamsters were bilaterally enucleated (eyes removed), a…	Circadian photoreceptor; Circadian rhythm; Extraocular photoreceptor; Jet lag; Melatonin; Pineal; Syrian hamster	Animalia; Cricetinae; Mesocricetus auratus									Yamazaki, S.; Department of Biology, NSF Center for Biological Timing, University of Virginia, Charlottesville, VA 22903-2477, United States			SAGE Publications Inc.					7487304		JBRHE	10452331	English	J. Biol. Rhythms	Article	Final		Scopus	2-s2.0-0033153702	1999_Yamazaki_No	1999_Yamazaki_No.pdf	https://sci-hub.se/10.1177/074873099129000605	Y
Hye Oh J., Ji Yang S., Rag Do Y.	56048006900;56047073800;37061856000;	Healthy, natural, efficient and tunable lighting: Four-package white LEDs for optimizing the circadian effect, color quality and vision performance	2014	Light: Science and Applications	3		e141				66	10.1038/lsa.2014.22	https://www.scopus.com/inward/record.uri?eid=2-s2.0-84894566257&doi=10.1038%2flsa.2014.22&partnerID=40&md5=e7557fcd427d310af3b815bf2edba28b	Department of Chemistry, Kookmin University, Seoul 136-702, South Korea	Hye Oh, J., Department of Chemistry, Kookmin University, Seoul 136-702, South Korea; Ji Yang, S., Department of Chemistry, Kookmin University, Seoul 136-702, South Korea; Rag Do, Y., Department of Chemistry, Kookmin University, Seoul 136-702, South Korea	To date, most current reports on the development and optimization of artificial lighting sources have focused on the energy performance levels and limited color qualities of white light-emitting diodes (LEDs). However, these properties are insufficient in terms of representing all performance levels required when adjusting white LEDs for healthy and smart lighting. Here, we introduce essential an…	circadian effect; color quality; solid-state lighting; vision performance; white LED	Color; Color vision; Energy conservation; Energy efficiency; Lighting; Artificial lighting; circadian effect; Color quality; Energy performance; Solid state lighting; Tunable lightings; White LED; White light emitting diodes; Light emitting diodes					National Research Foundation of Korea, NRF Ministry of Science ICT and Future Planning, MSIP: 2011-0017449 National Research Foundation of Korea, NRF	This work was supported by the National Research Foundation of Korea(NRF) grant funded by the Korea government(MSIP) (No. 2011-0017449).			Rag Do, Y.; Department of Chemistry, Kookmin University, Seoul 136-702, South Korea; email: yrdo@kookmin.ac.kr			Nature Publishing Group					20477538				English	Light Sci. Appl.	Article	Final	Open Access	Scopus	2-s2.0-84894566257	2014_Hye_Healthy,	2014_Hye_Healthy,.pdf	https://sci-hub.se/10.1038/lsa.2014.22	Y
Figueiro M.G., Rea M.S.	6603467729;57203044495;	The effects of red and blue lights on circadian variations in cortisol, alpha amylase, and melatonin	2010	International Journal of Endocrinology	2010		829351				66	10.1155/2010/829351	https://www.scopus.com/inward/record.uri?eid=2-s2.0-79951961380&doi=10.1155%2f2010%2f829351&partnerID=40&md5=d0e2f220b5cdc033a66dd54e592941b6	Lighting Research Center, Rensselaer Polytechnic Institute, 21 Union Street, New York, NY 12180, United States	Figueiro, M.G., Lighting Research Center, Rensselaer Polytechnic Institute, 21 Union Street, New York, NY 12180, United States; Rea, M.S., Lighting Research Center, Rensselaer Polytechnic Institute, 21 Union Street, New York, NY 12180, United States	The primary purpose of the present study was to expand our understanding of the impact of light exposures on the endocrine and autonomic systems as measured by acute cortisol, alpha amylase, and melatonin responses. We utilized exposures from narrowband long-wavelength (red) and from narrow-band short-wavelength (blue) lights to more precisely understand the role of the suprachiasmatic nuclei (SC…		amylase; hydrocortisone; melatonin; adult; article; autonomic nervous system; blue light; circadian rhythm; controlled study; cornea; endocrine system; female; human; human experiment; light exposure; male; normal human; priority journal; red light; sleep deprivation; suprachiasmatic nucleus		amylase, 9000-90-2, 9000-92-4, 9001-19-8; hydrocortisone, 50-23-7; melatonin, 73-31-4							Figueiro, M. G.; Lighting Research Center, Rensselaer Polytechnic Institute, 21 Union Street, New York, NY 12180, United States; email: figuem@rpi.edu								16878337				English	Intl. J. Endocrinol.	Article	Final	Open Access	Scopus	2-s2.0-79951961380	2010_Figueiro_The	2010_Figueiro_The.pdf	https://sci-hub.se/10.1155/2010/829351	Y
[truncated: 874 more rows]
[truncated: 13 more columns]

## Sheet: Stats
Number of subjects participated (in total) (#)	Number of female participants partcipated (in total) (#)	Number of males	Year	Proportion Female	Rounded Proportion	Year	Biased	Unbiased	Bias?		Proportion Female	Frequency
6	4	2	1980	0.666667	0.7	1980		0.6667	No		1	4
72	37	35	2001	0.513889	0.5	2001		0.5139	No		0.9	0
22	4	18	2001	0.181818	0.2	2001	0.1818		Yes		0.8	3
16	8	8	2003	0.5	0.5	2003		0.5	No		0.7	6
9	0	9	2005	0	0	2005	0		Yes		0.6	8
17	2	15	1995	0.1176	0.1	1995	0.1176		Yes		0.5	16
23	1	22	2000	0.043	0	2000	0.043		Yes		0.4	18
10	4	6	1989	0.4	0.4	1989		0.4	No		0.3	9
12	6	6	2015	0.5	0.5	2015		0.5	No		0.2	4
1	0	1	1982	0	0	1982		0	No		0.1	3
13	0	13	2011	0	0	2011	0		Yes		0	46
12	6	6	2002	0.5	0.5	2002		0.5	No
16	10	6	2003	0.625	0.6	2003		0.625	No
2	1	1	2007	0.5	0.5	2007		0.5	No
16	0	16	2011	0	0	2011	0		Yes
5	0	5	1987	0	0	1987		0	No
6	0	6	1988	0	0	1988	0		Yes
103	54	49	2000	0.5243	0.5	2000		0.5243	No
8	3	5	2004	0.375	0.4	2004		0.375	No
[truncated: 100 more rows]

## Sheet: Data 1 alphabetical
Authors	Author(s) ID	Title	Year	Examined?	Excluded?	If excluded, give reason (A=animal, R=review, C=commentary or letter to the editor, T=not about effect of light, O=other)	Country/countries of affiliation	Number of subjects participated (in total) (#)	Number of female participants partcipated (in total) (#)	Number of males	If all males, deliberate?	Proportion Female	Confidence Limits		Bias?	Control for menstrual cycle? (Y/N/Unknown)	Explicitly referred to menstrual phase?	Implicitly controlled (testing <48 hours) by within subjects design	True control?	If yes, which phase?	Control for contraceptive use? (Y/N/Unknown)	Mean age [yr]	SEM age [yr], if given	Age range [yr]	Outcome	Other comments?
[truncated: 465 more rows]

[truncated: 4 more sheets: Data 1, Inter-rater reliability, Articles, Summary]
